# Supplementary material
Source: publisher site journal article supplement (https://www.dovepress.com/article/531797)
Supplement: Supplementary file 1 [file 531797%20Revised%20_Supplementary%20Tables%20and%20Figures_2.pdf]

**Table S1. Details of platelet indices SNPs (with genome-wide significant SNPs)**

| Exposure       | SNP         | Effect allele | Other allele | P value | Beta  | Standard Error | F        | Median F | Mean F  |
|----------------|-------------|---------------|--------------|---------|-------|----------------|----------|----------|---------|
| Platelet Count | rs10048745  | A             | G            | 0.022   | 0.002 | 5.60E-19       | 79.187   | 64.228   | 132.317 |
|                | rs10074585  | G             | T            | 0.016   | 0.002 | 1.10E-11       | 46.072   |          |         |
|                | rs10090021  | T             | C            | (0.021) | 0.004 | 3.30E-08       | 30.501   |          |         |
|                | rs10116976  | C             | T            | 0.019   | 0.002 | 1.50E-17       | 72.766   |          |         |
|                | rs10135413  | G             | A            | 0.036   | 0.003 | 1.80E-35       | 154.486  |          |         |
|                | rs10139199  | T             | G            | 0.014   | 0.002 | 3.00E-08       | 30.724   |          |         |
|                | rs10140668  | T             | C            | 0.022   | 0.003 | 1.80E-14       | 58.687   |          |         |
|                | rs10174     | G             | A            | (0.017) | 0.002 | 1.00E-15       | 64.386   |          |         |
|                | rs10274404  | A             | G            | 0.013   | 0.002 | 3.50E-08       | 30.399   |          |         |
|                | rs10447226  | T             | G            | (0.016) | 0.002 | 3.50E-12       | 48.380   |          |         |
|                | rs10457632  | G             | A            | (0.079) | 0.002 | 1.00E-200      | 1008.180 |          |         |
|                | rs10458728  | C             | T            | (0.020) | 0.002 | 2.20E-17       | 71.954   |          |         |
|                | rs1047891   | A             | C            | (0.029) | 0.002 | 1.10E-37       | 164.549  |          |         |
|                | rs10510412  | A             | G            | 0.018   | 0.002 | 1.10E-13       | 55.151   |          |         |
|                | rs1059196   | T             | C            | (0.031) | 0.002 | 3.40E-36       | 157.794  |          |         |
|                | rs10758481  | C             | T            | (0.028) | 0.002 | 5.40E-39       | 170.634  |          |         |
|                | rs10766373  | A             | G            | (0.014) | 0.002 | 1.20E-10       | 41.480   |          |         |
|                | rs10774405  | A             | G            | (0.048) | 0.002 | 8.71E-114      | 513.970  |          |         |
|                | rs10817007  | G             | T            | 0.023   | 0.003 | 3.20E-13       | 53.082   |          |         |
|                | rs10820606  | C             | A            | 0.050   | 0.003 | 2.10E-87       | 392.727  |          |         |
|                | rs10821128  | C             | T            | (0.014) | 0.002 | 1.30E-10       | 41.267   |          |         |
|                | rs10864368  | C             | T            | 0.025   | 0.002 | 2.00E-33       | 145.116  |          |         |
|                | rs10876550  | A             | G            | 0.053   | 0.002 | 1.70E-139      | 632.101  |          |         |
|                | rs10876988  | A             | G            | (0.013) | 0.002 | 9.10E-10       | 37.510   |          |         |
|                | rs10886430  | G             | A            | (0.028) | 0.003 | 8.60E-18       | 73.814   |          |         |
|                | rs10940474  | T             | C            | (0.014) | 0.002 | 2.00E-10       | 40.469   |          |         |
|                | rs10974815  | T             | C            | 0.107   | 0.003 | 1.00E-200      | 1505.877 |          |         |
|                | rs10975153  | C             | G            | (0.015) | 0.002 | 1.90E-10       | 40.533   |          |         |
|                | rs10995455  | A             | G            | 0.069   | 0.002 | 1.00E-200      | 915.292  |          |         |
|                | rs11000980  | G             | A            | (0.013) | 0.002 | 1.70E-09       | 36.273   |          |         |
|                | rs11071720  | C             | T            | 0.042   | 0.002 | 2.60E-72       | 323.425  |          |         |
|                | rs11082304  | T             | G            | (0.051) | 0.002 | 1.80E-129      | 586.070  |          |         |
|                | rs11088304  | A             | G            | 0.024   | 0.002 | 1.60E-27       | 118.147  |          |         |
|                | rs11107060  | G             | A            | 0.028   | 0.003 | 5.90E-22       | 92.761   |          |         |
|                | rs11126598  | G             | A            | (0.017) | 0.002 | 3.70E-13       | 52.785   |          |         |
|                | rs11129295  | T             | C            | 0.017   | 0.002 | 1.70E-14       | 58.795   |          |         |
|                | rs11134475  | G             | A            | (0.020) | 0.002 | 8.40E-20       | 82.948   |          |         |
|                | rs11168249  | C             | T            | 0.032   | 0.002 | 7.60E-51       | 224.933  |          |         |
|                | rs111904024 | A             | G            | 0.058   | 0.006 | 4.70E-24       | 102.327  |          |         |
|                | rs11207345  | T             | C            | (0.015) | 0.003 | 4.90E-08       | 29.740   |          |         |
|                | rs112096491 | T             | C            | 0.013   | 0.002 | 8.40E-10       | 37.662   |          |         |
|                | rs11225024  | T             | A            | 0.022   | 0.004 | 5.30E-09       | 34.071   |          |         |
|                | rs11227249  | T             | C            | (0.026) | 0.002 | 1.50E-32       | 141.188  |          |         |
|                | rs11259186  | G             | T            | (0.016) | 0.002 | 1.70E-13       | 54.368   |          |         |
|                | rs112770790 | A             | G            | (0.031) | 0.003 | 6.70E-23       | 97.064   |          |         |
|                | rs113039006 | C             | T            | (0.017) | 0.003 | 3.20E-10       | 39.541   |          |         |
|                | rs113063027 | A             | C            | (0.035) | 0.004 | 3.80E-20       | 84.541   |          |         |
|                | rs113146860 | A             | G            | 0.020   | 0.003 | 3.40E-12       | 48.415   |          |         |

|             |   |   |         |       |           |          |
|-------------|---|---|---------|-------|-----------|----------|
| rs113542380 | A | G | (0.071) | 0.004 | 1.20E-68  | 306.555  |
| rs113596940 | C | T | (0.038) | 0.006 | 3.50E-10  | 39.378   |
| rs113693454 | A | T | (0.066) | 0.006 | 2.30E-28  | 121.971  |
| rs113721422 | A | G | 0.049   | 0.004 | 1.80E-35  | 154.451  |
| rs114694170 | C | T | 0.144   | 0.005 | 1.00E-200 | 1024.736 |
| rs114700498 | T | C | (0.035) | 0.005 | 2.20E-13  | 53.860   |
| rs114968084 | A | G | (0.059) | 0.006 | 5.00E-20  | 83.960   |
| rs115243514 | C | G | 0.119   | 0.008 | 5.30E-48  | 211.893  |
| rs115294879 | A | G | 0.029   | 0.005 | 4.30E-08  | 30.015   |
| rs11553699  | G | A | (0.083) | 0.003 | 4.90E-141 | 639.224  |
| rs115566353 | A | G | (0.067) | 0.011 | 4.30E-10  | 38.963   |
| rs11601507  | A | C | (0.034) | 0.004 | 3.10E-16  | 66.717   |
| rs116052829 | T | C | 0.031   | 0.003 | 3.10E-19  | 80.373   |
| rs11611855  | T | C | (0.022) | 0.002 | 1.60E-25  | 109.078  |
| rs11627485  | C | T | 0.024   | 0.002 | 1.40E-30  | 132.118  |
| rs11676298  | G | C | 0.029   | 0.003 | 4.30E-28  | 120.779  |
| rs11679328  | T | C | 0.026   | 0.004 | 3.20E-09  | 35.089   |
| rs117078929 | T | A | 0.021   | 0.003 | 8.70E-10  | 37.592   |
| rs117119759 | A | G | (0.050) | 0.006 | 1.70E-14  | 58.881   |
| rs11712335  | C | T | 0.013   | 0.002 | 1.30E-08  | 32.303   |
| rs11734099  | A | G | 0.050   | 0.003 | 4.10E-72  | 322.509  |
| rs11764390  | A | G | 0.024   | 0.002 | 1.10E-28  | 123.422  |
| rs117684519 | T | C | 0.035   | 0.006 | 8.90E-09  | 33.071   |
| rs117857686 | T | C | 0.109   | 0.007 | 1.40E-48  | 214.479  |
| rs118083884 | A | G | (0.059) | 0.009 | 1.50E-10  | 41.081   |
| rs11818463  | C | G | (0.023) | 0.002 | 5.40E-26  | 111.193  |
| rs11841319  | T | C | (0.064) | 0.004 | 3.50E-75  | 336.623  |
| rs11891555  | T | G | 0.014   | 0.002 | 3.10E-10  | 39.593   |
| rs11950562  | C | A | (0.023) | 0.002 | 4.30E-28  | 120.784  |
| rs12000252  | G | A | (0.020) | 0.002 | 5.50E-21  | 88.344   |
| rs12041331  | A | G | 0.034   | 0.004 | 4.20E-20  | 84.330   |
| rs12052715  | G | C | (0.037) | 0.002 | 2.70E-56  | 249.954  |
| rs12118065  | A | G | (0.029) | 0.002 | 2.10E-41  | 181.699  |
| rs12125200  | G | A | 0.032   | 0.002 | 5.20E-42  | 184.443  |
| rs12126199  | T | C | 0.050   | 0.006 | 5.20E-18  | 74.799   |
| rs12139095  | C | T | (0.018) | 0.002 | 2.00E-13  | 54.018   |
| rs12149168  | T | G | 0.020   | 0.002 | 9.90E-18  | 73.525   |
| rs12155039  | A | C | (0.034) | 0.002 | 2.00E-58  | 259.666  |
| rs12184308  | A | G | 0.016   | 0.002 | 2.10E-11  | 44.864   |
| rs12239737  | A | T | 0.013   | 0.002 | 2.80E-09  | 35.297   |
| rs12266852  | T | C | 0.024   | 0.003 | 5.30E-12  | 47.567   |
| rs12336065  | A | G | (0.032) | 0.005 | 5.10E-10  | 38.644   |
| rs12376511  | C | T | (0.048) | 0.003 | 6.30E-62  | 275.758  |
| rs12386849  | T | C | (0.015) | 0.002 | 4.50E-11  | 43.375   |
| rs12439144  | A | G | 0.016   | 0.002 | 2.90E-14  | 57.814   |
| rs12451471  | T | C | (0.015) | 0.002 | 5.30E-12  | 47.564   |
| rs12491785  | T | C | (0.023) | 0.002 | 1.70E-27  | 118.086  |
| rs12492695  | G | A | 0.012   | 0.002 | 2.60E-08  | 30.982   |
| rs12533403  | T | C | 0.016   | 0.002 | 1.40E-14  | 59.259   |
| rs12564806  | T | C | (0.039) | 0.002 | 1.90E-56  | 250.662  |

|             |   |   |         |       |          |         |
|-------------|---|---|---------|-------|----------|---------|
| rs1260326   | C | T | (0.041) | 0.002 | 2.30E-82 | 369.614 |
| rs1260405   | G | A | 0.020   | 0.002 | 3.30E-20 | 84.793  |
| rs12676105  | T | C | (0.018) | 0.002 | 4.30E-18 | 75.167  |
| rs12708514  | G | A | (0.023) | 0.003 | 1.50E-18 | 77.245  |
| rs12762934  | T | C | 0.019   | 0.002 | 3.20E-17 | 71.194  |
| rs12889267  | G | A | 0.016   | 0.003 | 8.80E-09 | 33.094  |
| rs12897841  | T | C | (0.013) | 0.002 | 9.50E-10 | 37.435  |
| rs12909131  | T | C | 0.017   | 0.002 | 1.00E-11 | 46.272  |
| rs12923319  | A | C | 0.016   | 0.002 | 9.60E-11 | 41.910  |
| rs12975577  | T | C | (0.016) | 0.002 | 9.10E-15 | 60.075  |
| rs12979891  | T | C | 0.015   | 0.002 | 3.80E-13 | 52.749  |
| rs12983010  | G | A | 0.048   | 0.004 | 1.40E-30 | 132.100 |
| rs13000644  | G | A | (0.013) | 0.002 | 1.20E-08 | 32.430  |
| rs13084317  | A | G | 0.017   | 0.002 | 2.50E-14 | 58.102  |
| rs13084357  | C | T | 0.045   | 0.004 | 1.10E-32 | 141.718 |
| rs13138724  | A | G | (0.016) | 0.002 | 7.80E-14 | 55.845  |
| rs13150834  | G | T | 0.022   | 0.002 | 1.60E-24 | 104.458 |
| rs13154903  | C | T | (0.024) | 0.003 | 6.70E-13 | 51.639  |
| rs13185488  | A | G | (0.021) | 0.003 | 2.90E-16 | 66.864  |
| rs13191948  | T | C | 0.024   | 0.002 | 6.10E-31 | 133.768 |
| rs13208045  | T | C | (0.030) | 0.003 | 1.80E-18 | 76.950  |
| rs13224082  | T | A | (0.034) | 0.002 | 1.00E-43 | 192.294 |
| rs13266443  | G | C | 0.026   | 0.003 | 3.40E-25 | 107.509 |
| rs13394819  | A | T | 0.017   | 0.002 | 6.40E-14 | 56.234  |
| rs138181113 | T | C | 0.032   | 0.005 | 7.50E-10 | 37.897  |
| rs138866    | A | G | 0.021   | 0.003 | 1.00E-15 | 64.379  |
| rs139974673 | C | T | 0.118   | 0.007 | 2.80E-69 | 309.492 |
| rs140436199 | A | G | (0.045) | 0.005 | 3.00E-23 | 98.655  |
| rs1408711   | G | C | 0.026   | 0.003 | 3.20E-23 | 98.546  |
| rs143822714 | G | A | 0.031   | 0.005 | 1.20E-08 | 32.458  |
| rs143900286 | A | T | (0.112) | 0.010 | 1.70E-30 | 131.732 |
| rs144075040 | C | G | (0.102) | 0.011 | 6.10E-22 | 92.682  |
| rs144317085 | T | A | 0.043   | 0.006 | 3.50E-13 | 52.914  |
| rs144663068 | G | A | (0.018) | 0.003 | 8.10E-09 | 33.256  |
| rs1472265   | C | T | (0.015) | 0.002 | 9.80E-12 | 46.360  |
| rs1476096   | C | A | 0.020   | 0.002 | 1.00E-19 | 82.558  |
| rs148383532 | A | G | (0.018) | 0.003 | 1.80E-09 | 36.188  |
| rs150950100 | T | C | (0.046) | 0.007 | 5.70E-10 | 38.428  |
| rs151234    | C | G | 0.066   | 0.003 | 7.60E-97 | 436.114 |
| rs1569419   | C | T | 0.023   | 0.003 | 1.20E-19 | 82.259  |
| rs160697    | G | A | 0.013   | 0.002 | 3.50E-09 | 34.858  |
| rs1641861   | A | G | 0.035   | 0.005 | 5.10E-12 | 47.634  |
| rs1642764   | T | C | (0.018) | 0.002 | 2.20E-17 | 71.914  |
| rs1645984   | C | T | (0.015) | 0.002 | 2.10E-09 | 35.923  |
| rs165177    | C | T | 0.017   | 0.002 | 3.40E-12 | 48.434  |
| rs1660155   | C | A | (0.013) | 0.002 | 6.20E-09 | 33.773  |
| rs167454    | T | C | (0.016) | 0.003 | 1.80E-10 | 40.723  |
| rs167924    | G | A | 0.021   | 0.002 | 4.70E-22 | 93.199  |
| rs16943595  | C | G | (0.021) | 0.003 | 2.30E-12 | 49.173  |
| rs17093381  | G | A | (0.016) | 0.003 | 5.10E-09 | 34.132  |

|            |   |   |         |       |           |         |
|------------|---|---|---------|-------|-----------|---------|
| rs17138723 | G | C | (0.031) | 0.003 | 9.50E-33  | 142.040 |
| rs1716505  | G | C | 0.042   | 0.002 | 5.30E-76  | 340.364 |
| rs17175830 | A | G | 0.036   | 0.003 | 4.90E-47  | 207.461 |
| rs1719271  | G | A | 0.052   | 0.003 | 3.10E-64  | 286.324 |
| rs1727324  | T | A | 0.029   | 0.003 | 7.30E-29  | 124.293 |
| rs17302005 | G | A | 0.018   | 0.003 | 7.00E-11  | 42.515  |
| rs17572109 | A | G | 0.038   | 0.003 | 5.90E-52  | 230.032 |
| rs1768584  | G | A | 0.048   | 0.002 | 7.60E-110 | 495.850 |
| rs17707466 | G | A | (0.019) | 0.003 | 1.60E-11  | 45.390  |
| rs17720826 | A | G | 0.030   | 0.004 | 1.40E-13  | 54.650  |
| rs17758695 | T | C | (0.067) | 0.006 | 6.70E-27  | 115.332 |
| rs178010   | T | A | 0.015   | 0.002 | 4.80E-10  | 38.742  |
| rs1865761  | C | T | (0.014) | 0.002 | 6.90E-11  | 42.550  |
| rs1895490  | A | G | 0.018   | 0.002 | 2.40E-17  | 71.814  |
| rs191378   | A | G | 0.019   | 0.003 | 7.20E-14  | 56.012  |
| rs1924930  | A | T | (0.015) | 0.003 | 8.60E-09  | 33.142  |
| rs198217   | G | T | 0.011   | 0.002 | 4.80E-08  | 29.777  |
| rs1997577  | T | A | (0.018) | 0.003 | 2.00E-09  | 35.956  |
| rs1997719  | T | C | (0.021) | 0.002 | 2.40E-23  | 99.124  |
| rs2015210  | G | T | (0.026) | 0.002 | 1.60E-26  | 113.630 |
| rs2015599  | A | G | (0.045) | 0.002 | 8.99E-101 | 454.150 |
| rs2017372  | T | C | 0.020   | 0.003 | 4.50E-10  | 38.872  |
| rs2038479  | A | C | (0.064) | 0.003 | 4.60E-130 | 588.775 |
| rs2038700  | C | T | 0.016   | 0.002 | 1.30E-13  | 54.910  |
| rs2040395  | C | T | 0.013   | 0.002 | 1.40E-09  | 36.689  |
| rs2068888  | A | G | (0.022) | 0.002 | 4.70E-26  | 111.453 |
| rs2070738  | C | T | (0.014) | 0.002 | 3.00E-10  | 39.658  |
| rs211510   | G | A | (0.014) | 0.002 | 5.30E-11  | 43.059  |
| rs2122403  | A | G | (0.023) | 0.004 | 3.30E-09  | 34.983  |
| rs2133886  | G | T | 0.067   | 0.002 | 1.00E-200 | 956.423 |
| rs218265   | C | T | 0.020   | 0.003 | 1.50E-11  | 45.537  |
| rs2243103  | G | C | 0.074   | 0.004 | 9.60E-75  | 334.590 |
| rs2255531  | A | G | (0.024) | 0.002 | 3.00E-28  | 121.478 |
| rs2274319  | C | T | (0.027) | 0.002 | 3.80E-35  | 153.042 |
| rs2281232  | A | C | (0.024) | 0.004 | 2.10E-08  | 31.443  |
| rs2294921  | T | C | (0.028) | 0.003 | 3.00E-22  | 94.091  |
| rs2295205  | G | C | 0.015   | 0.002 | 9.00E-10  | 37.541  |
| rs2297066  | G | C | 0.052   | 0.002 | 7.20E-98  | 440.817 |
| rs2305769  | C | G | 0.015   | 0.003 | 1.30E-09  | 36.769  |
| rs2321536  | T | C | 0.019   | 0.002 | 4.20E-18  | 75.210  |
| rs2351772  | T | C | 0.016   | 0.002 | 7.90E-14  | 55.833  |
| rs2353701  | C | T | 0.012   | 0.002 | 2.40E-08  | 31.116  |
| rs238911   | A | G | (0.017) | 0.002 | 1.80E-15  | 63.236  |
| rs2389874  | G | A | 0.020   | 0.002 | 9.10E-20  | 82.792  |
| rs2417966  | G | C | 0.017   | 0.002 | 1.50E-12  | 50.088  |
| rs2455425  | C | T | (0.021) | 0.004 | 2.30E-08  | 31.224  |
| rs2475218  | T | C | (0.026) | 0.004 | 9.40E-13  | 50.969  |
| rs2494663  | A | C | (0.021) | 0.002 | 5.90E-24  | 101.865 |
| rs2498244  | C | A | 0.013   | 0.002 | 1.30E-08  | 32.364  |
| rs2520096  | G | A | 0.034   | 0.002 | 1.10E-45  | 201.205 |

|             |   |   |         |       |           |          |
|-------------|---|---|---------|-------|-----------|----------|
| rs2613522   | G | A | (0.015) | 0.002 | 1.30E-10  | 41.243   |
| rs2641443   | A | G | (0.030) | 0.002 | 1.10E-36  | 160.090  |
| rs2689216   | A | G | 0.019   | 0.002 | 7.30E-17  | 69.596   |
| rs2700936   | G | T | 0.017   | 0.002 | 1.50E-15  | 63.677   |
| rs2708421   | T | C | (0.013) | 0.002 | 6.10E-10  | 38.287   |
| rs2724564   | T | G | 0.025   | 0.002 | 2.30E-32  | 140.278  |
| rs2744963   | A | G | (0.028) | 0.003 | 4.30E-27  | 116.202  |
| rs2755214   | G | T | 0.024   | 0.002 | 5.60E-25  | 106.540  |
| rs2758994   | T | C | (0.019) | 0.002 | 2.10E-15  | 62.941   |
| rs2786802   | T | G | (0.018) | 0.003 | 4.90E-11  | 43.221   |
| rs2788500   | G | A | (0.042) | 0.004 | 2.00E-20  | 85.775   |
| rs2797688   | C | T | 0.020   | 0.002 | 9.40E-22  | 91.842   |
| rs2836425   | T | C | 0.038   | 0.003 | 6.90E-34  | 147.257  |
| rs28456     | G | A | 0.040   | 0.002 | 4.20E-68  | 304.100  |
| rs28505677  | G | C | (0.035) | 0.003 | 1.00E-44  | 196.887  |
| rs2900177   | T | C | 0.017   | 0.002 | 3.30E-14  | 57.547   |
| rs2925033   | T | C | (0.015) | 0.002 | 1.70E-12  | 49.838   |
| rs296887    | T | C | 0.015   | 0.002 | 8.60E-10  | 37.616   |
| rs2999157   | A | G | (0.030) | 0.002 | 6.40E-47  | 206.948  |
| rs303968    | C | T | (0.019) | 0.002 | 1.10E-18  | 77.887   |
| rs3122414   | A | G | (0.016) | 0.002 | 9.70E-13  | 50.897   |
| rs34143604  | A | C | 0.016   | 0.002 | 1.50E-13  | 54.582   |
| rs34152163  | C | G | (0.014) | 0.002 | 1.40E-10  | 41.144   |
| rs342299    | T | C | (0.071) | 0.002 | 1.00E-200 | 1104.568 |
| rs34329     | C | G | 0.017   | 0.002 | 1.80E-13  | 54.231   |
| rs34341922  | A | G | 0.023   | 0.002 | 3.80E-27  | 116.451  |
| rs34346558  | C | A | 0.020   | 0.003 | 5.40E-14  | 56.563   |
| rs34524896  | T | C | (0.090) | 0.005 | 1.90E-74  | 333.184  |
| rs34587839  | A | G | 0.017   | 0.003 | 3.70E-09  | 34.755   |
| rs34592828  | A | G | (0.139) | 0.005 | 5.00E-161 | 731.164  |
| rs34651     | T | C | 0.044   | 0.004 | 1.60E-29  | 127.247  |
| rs34750619  | A | G | 0.037   | 0.004 | 3.40E-19  | 80.166   |
| rs34968913  | A | G | (0.019) | 0.003 | 1.60E-14  | 59.033   |
| rs35027951  | G | A | (0.014) | 0.003 | 4.00E-08  | 30.166   |
| rs35069969  | C | G | 0.016   | 0.002 | 2.00E-13  | 54.020   |
| rs35144104  | T | C | 0.076   | 0.002 | 1.00E-200 | 1059.937 |
| rs35258120  | A | G | 0.051   | 0.003 | 1.60E-78  | 351.914  |
| rs35267052  | G | T | 0.026   | 0.003 | 1.40E-13  | 54.681   |
| rs35330522  | A | G | 0.019   | 0.002 | 4.00E-20  | 84.400   |
| rs35355140  | A | C | (0.027) | 0.004 | 1.70E-10  | 40.804   |
| rs35732917  | C | T | (0.016) | 0.002 | 2.80E-12  | 48.842   |
| rs35989952  | C | T | 0.036   | 0.004 | 3.10E-22  | 94.024   |
| rs36034566  | C | A | 0.016   | 0.002 | 6.80E-14  | 56.131   |
| rs36109901  | C | A | 0.063   | 0.002 | 5.11E-155 | 703.543  |
| rs371270656 | A | T | 0.076   | 0.010 | 3.00E-13  | 53.206   |
| rs3731211   | A | T | 0.044   | 0.002 | 1.30E-77  | 347.781  |
| rs3736313   | G | A | (0.015) | 0.002 | 1.60E-10  | 40.904   |
| rs374039502 | A | T | (0.050) | 0.008 | 1.10E-10  | 41.626   |
| rs3742028   | A | G | (0.045) | 0.002 | 1.00E-97  | 440.154  |
| rs3742271   | C | G | 0.017   | 0.002 | 8.60E-15  | 60.200   |

|            |   |   |         |       |          |         |
|------------|---|---|---------|-------|----------|---------|
| rs3742321  | C | T | (0.016) | 0.003 | 5.80E-10 | 38.393  |
| rs3760868  | G | T | (0.023) | 0.003 | 1.10E-13 | 55.204  |
| rs3764535  | A | G | 0.020   | 0.002 | 2.80E-21 | 89.678  |
| rs3767812  | A | G | 0.037   | 0.003 | 1.80E-48 | 214.050 |
| rs3771529  | A | G | (0.032) | 0.003 | 5.80E-33 | 143.042 |
| rs3804749  | T | C | (0.037) | 0.002 | 2.70E-68 | 304.983 |
| rs3806233  | A | G | 0.014   | 0.002 | 1.50E-10 | 40.980  |
| rs381500   | A | C | 0.031   | 0.002 | 2.50E-48 | 213.371 |
| rs3865444  | A | C | (0.024) | 0.002 | 1.50E-26 | 113.745 |
| rs3943516  | G | A | 0.015   | 0.002 | 9.50E-12 | 46.436  |
| rs3956381  | A | C | 0.016   | 0.002 | 6.80E-13 | 51.597  |
| rs41266821 | G | A | (0.031) | 0.003 | 1.30E-21 | 91.129  |
| rs41375145 | G | A | (0.027) | 0.004 | 4.80E-14 | 56.829  |
| rs4148445  | T | C | 0.074   | 0.004 | 6.80E-84 | 376.626 |
| rs4286082  | T | C | (0.016) | 0.002 | 3.00E-12 | 48.691  |
| rs4357501  | T | C | (0.012) | 0.002 | 1.00E-08 | 32.761  |
| rs4377525  | C | A | (0.028) | 0.002 | 5.80E-31 | 133.865 |
| rs4442541  | G | A | 0.022   | 0.002 | 2.20E-21 | 90.158  |
| rs4449748  | G | A | 0.022   | 0.002 | 1.90E-19 | 81.325  |
| rs4477285  | A | G | 0.018   | 0.002 | 5.30E-17 | 70.226  |
| rs4538653  | C | G | (0.044) | 0.002 | 5.20E-81 | 363.356 |
| rs4588     | T | G | (0.014) | 0.002 | 3.40E-09 | 34.922  |
| rs458857   | A | C | 0.015   | 0.002 | 1.60E-12 | 49.902  |
| rs4670779  | T | C | (0.019) | 0.002 | 1.10E-16 | 68.799  |
| rs4711890  | G | C | 0.029   | 0.002 | 1.60E-34 | 150.179 |
| rs4720246  | G | A | (0.018) | 0.003 | 9.90E-11 | 41.844  |
| rs4754299  | T | C | 0.021   | 0.002 | 6.20E-23 | 97.236  |
| rs4771666  | T | C | 0.015   | 0.003 | 6.20E-09 | 33.785  |
| rs4780355  | C | T | 0.021   | 0.002 | 1.20E-19 | 82.192  |
| rs4783189  | G | A | (0.043) | 0.003 | 1.00E-42 | 187.635 |
| rs4793987  | C | T | (0.013) | 0.002 | 2.20E-09 | 35.807  |
| rs4812449  | G | C | 0.014   | 0.002 | 5.60E-11 | 42.963  |
| rs4815915  | A | G | (0.018) | 0.002 | 1.30E-15 | 63.978  |
| rs4818033  | C | T | (0.020) | 0.002 | 8.40E-18 | 73.847  |
| rs4820013  | C | T | 0.016   | 0.002 | 6.50E-12 | 47.188  |
| rs482246   | G | A | 0.015   | 0.002 | 6.50E-12 | 47.171  |
| rs4846082  | T | C | (0.039) | 0.002 | 4.40E-77 | 345.343 |
| rs4846914  | A | G | 0.028   | 0.002 | 1.20E-37 | 164.474 |
| rs4849845  | A | G | (0.035) | 0.002 | 2.80E-53 | 236.099 |
| rs4858819  | T | C | (0.016) | 0.002 | 7.70E-11 | 42.326  |
| rs4883519  | C | T | 0.012   | 0.002 | 4.90E-09 | 34.221  |
| rs4896117  | C | T | (0.032) | 0.002 | 2.00E-50 | 222.991 |
| rs4902244  | G | A | 0.017   | 0.003 | 6.50E-09 | 33.668  |
| rs4913405  | A | G | 0.018   | 0.002 | 2.00E-13 | 53.989  |
| rs4924839  | G | A | 0.013   | 0.002 | 2.40E-09 | 35.616  |
| rs4937127  | G | A | (0.027) | 0.002 | 5.90E-38 | 165.875 |
| rs4946366  | T | C | (0.017) | 0.003 | 5.00E-09 | 34.186  |
| rs4947490  | G | A | 0.017   | 0.002 | 1.50E-13 | 54.607  |
| rs4965426  | A | G | (0.041) | 0.003 | 3.50E-42 | 185.235 |
| rs4972760  | G | A | 0.020   | 0.003 | 4.00E-10 | 39.132  |

|            |   |   |         |       |           |         |
|------------|---|---|---------|-------|-----------|---------|
| rs4979859  | T | G | 0.019   | 0.002 | 1.90E-15  | 63.191  |
| rs55664157 | A | T | (0.031) | 0.003 | 6.70E-22  | 92.505  |
| rs55708816 | A | G | 0.032   | 0.003 | 9.70E-21  | 87.228  |
| rs55773542 | T | C | (0.027) | 0.003 | 6.50E-15  | 60.730  |
| rs55794721 | A | G | (0.036) | 0.002 | 2.10E-64  | 287.170 |
| rs55879786 | A | G | (0.028) | 0.003 | 4.60E-25  | 106.926 |
| rs56088754 | G | A | 0.017   | 0.002 | 5.50E-14  | 56.543  |
| rs57273488 | A | G | 0.041   | 0.006 | 1.40E-10  | 41.207  |
| rs57486725 | G | T | (0.050) | 0.004 | 9.60E-37  | 160.327 |
| rs57843631 | T | C | (0.235) | 0.008 | 3.30E-189 | 860.800 |
| rs58241613 | A | T | 0.051   | 0.007 | 1.60E-13  | 54.394  |
| rs583306   | T | C | 0.022   | 0.002 | 1.00E-19  | 82.564  |
| rs58722186 | T | C | 0.023   | 0.002 | 8.10E-24  | 101.248 |
| rs58954593 | T | C | (0.021) | 0.003 | 1.90E-14  | 58.634  |
| rs594942   | C | T | 0.018   | 0.002 | 1.50E-16  | 68.136  |
| rs60188612 | A | G | 0.015   | 0.003 | 1.70E-08  | 31.754  |
| rs60232238 | C | G | (0.017) | 0.002 | 5.20E-12  | 47.593  |
| rs6031907  | A | G | (0.013) | 0.002 | 5.90E-10  | 38.357  |
| rs6035274  | C | T | (0.014) | 0.002 | 2.30E-11  | 44.729  |
| rs60384564 | C | A | (0.054) | 0.005 | 8.30E-23  | 96.633  |
| rs6044953  | A | G | (0.013) | 0.002 | 3.20E-09  | 35.077  |
| rs6045612  | T | C | (0.043) | 0.002 | 7.60E-71  | 316.694 |
| rs6060976  | A | G | (0.034) | 0.002 | 2.00E-47  | 209.248 |
| rs6066390  | T | C | 0.016   | 0.003 | 3.10E-10  | 39.589  |
| rs60757417 | G | C | (0.080) | 0.004 | 1.70E-70  | 315.143 |
| rs61025394 | A | G | (0.017) | 0.003 | 3.90E-11  | 43.666  |
| rs6103669  | A | G | (0.018) | 0.002 | 5.30E-14  | 56.598  |
| rs6140670  | A | G | (0.016) | 0.002 | 8.00E-12  | 46.777  |
| rs6141     | T | C | 0.060   | 0.002 | 1.30E-181 | 825.916 |
| rs61608280 | G | A | 0.014   | 0.002 | 6.90E-11  | 42.555  |
| rs61781290 | G | A | 0.027   | 0.002 | 5.80E-30  | 129.307 |
| rs619011   | G | A | 0.015   | 0.002 | 9.60E-11  | 41.903  |
| rs61966631 | C | T | 0.027   | 0.002 | 1.30E-35  | 155.184 |
| rs61986599 | A | G | (0.020) | 0.002 | 1.50E-18  | 77.198  |
| rs62002318 | G | A | 0.014   | 0.002 | 2.10E-11  | 44.848  |
| rs62022865 | C | A | (0.021) | 0.003 | 6.20E-12  | 47.259  |
| rs62113963 | T | C | (0.015) | 0.002 | 1.90E-09  | 36.043  |
| rs62217799 | T | G | 0.018   | 0.002 | 5.60E-16  | 65.577  |
| rs62241230 | T | C | (0.017) | 0.002 | 3.40E-14  | 57.477  |
| rs62397627 | G | A | 0.030   | 0.003 | 4.40E-32  | 138.991 |
| rs62491380 | G | A | (0.028) | 0.004 | 4.60E-15  | 61.410  |
| rs62523770 | T | G | 0.025   | 0.003 | 8.90E-21  | 87.397  |
| rs635887   | G | T | (0.017) | 0.002 | 4.40E-14  | 56.962  |
| rs6420998  | A | G | 0.038   | 0.004 | 1.00E-25  | 109.900 |
| rs6439675  | A | G | 0.018   | 0.002 | 5.00E-17  | 70.346  |
| rs6444571  | C | T | 0.022   | 0.002 | 8.20E-20  | 83.012  |
| rs645901   | C | T | 0.037   | 0.003 | 1.70E-32  | 140.850 |
| rs646809   | T | C | 0.018   | 0.003 | 2.20E-12  | 49.298  |
| rs648103   | C | T | 0.017   | 0.002 | 2.50E-14  | 58.097  |
| rs6533483  | A | G | (0.026) | 0.002 | 2.10E-33  | 145.027 |

|            |   |   |         |       |           |         |
|------------|---|---|---------|-------|-----------|---------|
| rs6537255  | C | T | 0.018   | 0.002 | 4.10E-17  | 70.748  |
| rs6546909  | T | A | 0.024   | 0.003 | 2.20E-16  | 67.426  |
| rs655029   | A | G | 0.069   | 0.002 | 8.49E-192 | 872.701 |
| rs6554595  | T | C | 0.014   | 0.002 | 1.80E-11  | 45.192  |
| rs6556405  | C | T | (0.027) | 0.002 | 5.40E-29  | 124.866 |
| rs656163   | G | A | (0.012) | 0.002 | 4.90E-08  | 29.737  |
| rs6572992  | G | C | 0.014   | 0.002 | 1.70E-10  | 40.821  |
| rs6588634  | T | C | 0.023   | 0.003 | 2.60E-11  | 44.429  |
| rs658974   | T | C | (0.032) | 0.004 | 5.30E-14  | 56.623  |
| rs6592965  | A | G | 0.016   | 0.002 | 1.70E-14  | 58.844  |
| rs6593513  | C | T | (0.013) | 0.002 | 5.70E-09  | 33.944  |
| rs6664992  | G | A | 0.012   | 0.002 | 3.50E-08  | 30.417  |
| rs669556   | T | C | 0.021   | 0.003 | 8.00E-16  | 64.877  |
| rs6696074  | T | C | 0.015   | 0.002 | 8.40E-12  | 46.662  |
| rs6706095  | G | T | 0.023   | 0.002 | 1.10E-20  | 87.006  |
| rs67149561 | C | G | 0.025   | 0.003 | 3.90E-18  | 75.362  |
| rs6786088  | C | T | (0.032) | 0.002 | 1.00E-46  | 205.977 |
| rs6793096  | G | A | (0.017) | 0.003 | 1.00E-10  | 41.806  |
| rs6815294  | A | G | 0.022   | 0.002 | 6.70E-24  | 101.631 |
| rs6863275  | C | A | (0.024) | 0.004 | 2.10E-10  | 40.367  |
| rs6880286  | T | C | 0.019   | 0.002 | 3.50E-19  | 80.131  |
| rs6883116  | C | T | (0.012) | 0.002 | 8.80E-09  | 33.090  |
| rs6883827  | G | A | 0.028   | 0.002 | 3.00E-39  | 171.804 |
| rs6916257  | A | C | (0.031) | 0.005 | 8.40E-10  | 37.665  |
| rs6985149  | G | A | (0.019) | 0.002 | 1.00E-16  | 68.909  |
| rs6993770  | T | A | (0.070) | 0.002 | 1.60E-196 | 894.394 |
| rs7000170  | A | G | (0.021) | 0.002 | 4.30E-19  | 79.727  |
| rs7010394  | C | T | 0.018   | 0.002 | 2.10E-17  | 72.026  |
| rs706025   | A | C | 0.012   | 0.002 | 6.00E-09  | 33.846  |
| rs7096937  | C | T | (0.013) | 0.002 | 1.70E-08  | 31.759  |
| rs7111926  | A | C | (0.027) | 0.002 | 8.60E-33  | 142.244 |
| rs7113149  | T | C | (0.021) | 0.004 | 3.20E-09  | 35.076  |
| rs7115672  | C | T | 0.023   | 0.004 | 2.20E-10  | 40.238  |
| rs7117878  | A | C | 0.016   | 0.002 | 8.10E-13  | 51.266  |
| rs7124681  | A | C | (0.025) | 0.002 | 3.10E-31  | 135.135 |
| rs71265190 | A | G | (0.016) | 0.003 | 6.90E-11  | 42.556  |
| rs7213617  | G | A | (0.020) | 0.002 | 7.40E-20  | 83.204  |
| rs7223589  | C | T | 0.017   | 0.002 | 6.50E-15  | 60.747  |
| rs7233932  | G | C | 0.015   | 0.002 | 1.20E-10  | 41.390  |
| rs7249692  | C | T | (0.029) | 0.002 | 2.20E-39  | 172.445 |
| rs7252328  | G | A | 0.025   | 0.003 | 2.90E-17  | 71.434  |
| rs7253820  | G | A | 0.022   | 0.002 | 3.90E-25  | 107.240 |
| rs7254827  | T | A | (0.027) | 0.003 | 6.50E-27  | 115.390 |
| rs72627500 | G | A | (0.020) | 0.003 | 1.00E-10  | 41.757  |
| rs72687006 | C | T | 0.062   | 0.008 | 2.60E-13  | 53.527  |
| rs72725158 | C | T | (0.048) | 0.003 | 3.30E-62  | 277.025 |
| rs72760940 | T | C | (0.027) | 0.004 | 4.50E-11  | 43.393  |
| rs72917118 | T | C | (0.018) | 0.003 | 7.00E-10  | 38.011  |
| rs7294800  | A | C | 0.019   | 0.003 | 8.70E-09  | 33.107  |
| rs72969820 | T | C | (0.030) | 0.003 | 5.70E-19  | 79.167  |

|            |   |   |         |       |           |          |
|------------|---|---|---------|-------|-----------|----------|
| rs72996108 | A | C | (0.026) | 0.004 | 1.10E-13  | 55.098   |
| rs73036520 | C | G | (0.049) | 0.002 | 2.30E-88  | 397.148  |
| rs73037185 | T | C | 0.024   | 0.004 | 3.50E-09  | 34.870   |
| rs7309426  | A | G | 0.018   | 0.003 | 7.40E-11  | 42.412   |
| rs73140125 | G | A | 0.017   | 0.003 | 4.30E-08  | 29.996   |
| rs73226473 | C | T | 0.018   | 0.003 | 3.20E-10  | 39.571   |
| rs7332115  | G | T | 0.026   | 0.002 | 8.50E-32  | 137.700  |
| rs73617438 | A | G | (0.017) | 0.003 | 4.90E-08  | 29.742   |
| rs7385804  | A | C | 0.027   | 0.002 | 2.80E-34  | 149.065  |
| rs74227709 | A | G | (0.136) | 0.004 | 1.00E-200 | 1111.476 |
| rs74403919 | A | T | 0.016   | 0.003 | 8.50E-09  | 33.162   |
| rs74519049 | T | C | 0.032   | 0.004 | 3.50E-14  | 57.417   |
| rs74528993 | A | G | 0.025   | 0.004 | 1.10E-08  | 32.635   |
| rs75065607 | C | T | (0.043) | 0.008 | 3.00E-08  | 30.727   |
| rs75107793 | A | G | 0.114   | 0.004 | 6.61E-169 | 767.392  |
| rs7516301  | C | T | 0.017   | 0.002 | 1.20E-15  | 64.077   |
| rs7532552  | G | A | (0.013) | 0.002 | 1.30E-08  | 32.284   |
| rs75511465 | A | G | (0.067) | 0.008 | 1.60E-15  | 63.487   |
| rs75659987 | A | T | 0.038   | 0.006 | 1.40E-10  | 41.224   |
| rs7571154  | T | C | 0.015   | 0.002 | 2.70E-10  | 39.896   |
| rs7577057  | C | T | 0.019   | 0.002 | 2.20E-19  | 81.064   |
| rs7585866  | G | A | 0.018   | 0.002 | 4.00E-17  | 70.762   |
| rs7630419  | A | G | (0.015) | 0.002 | 5.80E-13  | 51.909   |
| rs7641325  | A | G | (0.036) | 0.002 | 3.40E-65  | 290.754  |
| rs76445378 | T | C | 0.100   | 0.008 | 9.80E-33  | 141.991  |
| rs76452111 | T | A | (0.057) | 0.005 | 5.30E-27  | 115.766  |
| rs76496105 | G | C | (0.028) | 0.004 | 1.30E-14  | 59.320   |
| rs7652441  | G | A | 0.016   | 0.003 | 8.10E-10  | 37.732   |
| rs7655560  | A | G | (0.030) | 0.005 | 2.80E-10  | 39.829   |
| rs7658679  | T | C | (0.015) | 0.002 | 1.90E-12  | 49.575   |
| rs7660913  | C | G | 0.028   | 0.004 | 2.80E-10  | 39.816   |
| rs7671752  | T | C | (0.015) | 0.002 | 1.20E-12  | 50.425   |
| rs76840964 | G | A | (0.024) | 0.003 | 8.30E-14  | 55.726   |
| rs76859665 | T | G | (0.034) | 0.005 | 9.80E-10  | 37.368   |
| rs7705526  | A | C | 0.044   | 0.002 | 3.40E-82  | 368.812  |
| rs7706078  | T | C | (0.014) | 0.002 | 1.80E-10  | 40.674   |
| rs7760090  | G | A | (0.023) | 0.003 | 1.20E-17  | 73.133   |
| rs777490   | T | C | (0.015) | 0.002 | 3.10E-10  | 39.633   |
| rs77808283 | A | G | 0.048   | 0.006 | 3.30E-18  | 75.705   |
| rs77844289 | C | T | 0.076   | 0.004 | 2.50E-84  | 378.634  |
| rs7789916  | A | G | (0.021) | 0.002 | 5.60E-19  | 79.208   |
| rs78157248 | C | T | 0.028   | 0.004 | 2.20E-11  | 44.758   |
| rs78261031 | A | G | (0.030) | 0.004 | 2.20E-11  | 44.828   |
| rs7830416  | A | T | 0.020   | 0.003 | 2.10E-10  | 40.413   |
| rs7833924  | G | A | 0.042   | 0.002 | 2.10E-85  | 383.587  |
| rs78376243 | T | C | 0.020   | 0.003 | 1.70E-11  | 45.296   |
| rs7843024  | A | G | 0.016   | 0.002 | 1.30E-13  | 54.862   |
| rs7851531  | G | A | (0.012) | 0.002 | 4.80E-08  | 29.797   |
| rs7865719  | G | A | (0.041) | 0.002 | 4.70E-85  | 381.935  |
| rs7870898  | T | C | 0.028   | 0.002 | 1.20E-35  | 155.355  |

|            |   |   |         |       |           |         |
|------------|---|---|---------|-------|-----------|---------|
| rs78909033 | A | G | 0.062   | 0.003 | 1.70E-91  | 411.494 |
| rs78973710 | G | A | 0.021   | 0.003 | 7.90E-10  | 37.787  |
| rs79007502 | C | T | 0.091   | 0.005 | 2.70E-62  | 277.459 |
| rs7912685  | C | T | 0.021   | 0.003 | 3.00E-12  | 48.666  |
| rs79541578 | A | G | (0.020) | 0.003 | 3.70E-15  | 61.837  |
| rs79716587 | A | G | (0.022) | 0.003 | 4.50E-12  | 47.877  |
| rs80012730 | C | A | (0.042) | 0.004 | 4.70E-25  | 106.903 |
| rs80054178 | C | T | 0.129   | 0.007 | 4.20E-73  | 327.057 |
| rs8049394  | A | G | (0.022) | 0.002 | 5.00E-20  | 83.985  |
| rs8050500  | C | T | 0.018   | 0.002 | 1.10E-16  | 68.776  |
| rs8072157  | A | T | (0.020) | 0.003 | 1.40E-14  | 59.260  |
| rs8081858  | T | C | (0.062) | 0.002 | 5.79E-192 | 873.450 |
| rs8098454  | T | C | 0.025   | 0.004 | 1.30E-11  | 45.824  |
| rs8106212  | T | C | (0.091) | 0.010 | 4.10E-20  | 84.380  |
| rs8128904  | T | C | (0.017) | 0.003 | 6.70E-09  | 33.613  |
| rs8129054  | G | A | 0.020   | 0.002 | 3.40E-16  | 66.581  |
| rs8178824  | T | C | 0.100   | 0.006 | 3.20E-59  | 263.358 |
| rs855791   | G | A | (0.028) | 0.002 | 7.00E-38  | 165.525 |
| rs896156   | C | T | (0.035) | 0.004 | 5.20E-21  | 88.450  |
| rs9266658  | A | G | 0.059   | 0.003 | 4.40E-96  | 432.586 |
| rs9294458  | A | G | (0.012) | 0.002 | 2.40E-08  | 31.165  |
| rs9371672  | G | C | (0.013) | 0.002 | 5.90E-09  | 33.855  |
| rs9382146  | A | G | (0.025) | 0.002 | 3.30E-32  | 139.592 |
| rs9400379  | G | A | 0.019   | 0.002 | 5.50E-19  | 79.258  |
| rs9410195  | T | C | (0.066) | 0.004 | 1.90E-50  | 223.155 |
| rs947001   | G | A | (0.017) | 0.002 | 3.10E-14  | 57.652  |
| rs950965   | G | A | 0.023   | 0.002 | 1.30E-25  | 109.382 |
| rs9535495  | T | C | (0.014) | 0.002 | 1.70E-10  | 40.733  |
| rs9704476  | C | T | (0.015) | 0.002 | 2.20E-12  | 49.316  |
| rs9809116  | G | A | 0.020   | 0.002 | 1.70E-20  | 86.136  |
| rs9828304  | A | G | 0.012   | 0.002 | 6.30E-09  | 33.733  |
| rs9829114  | A | G | (0.023) | 0.002 | 5.90E-26  | 111.022 |
| rs984796   | G | T | (0.037) | 0.002 | 7.60E-69  | 307.518 |
| rs9879207  | C | T | 0.017   | 0.003 | 7.80E-10  | 37.822  |
| rs9912392  | C | G | (0.032) | 0.002 | 3.30E-50  | 222.030 |
| rs9916458  | A | G | 0.024   | 0.003 | 5.40E-20  | 83.838  |
| rs9919955  | C | G | (0.029) | 0.003 | 8.90E-25  | 105.623 |
| rs9947269  | C | T | 0.031   | 0.003 | 3.00E-23  | 98.636  |
| rs9950562  | T | C | (0.015) | 0.002 | 4.60E-12  | 47.862  |
| rs9967130  | G | A | 0.014   | 0.002 | 1.20E-09  | 36.912  |
| rs10048745 | A | G | 0.022   | 0.002 | 5.60E-19  | 79.187  |
| rs10074585 | G | T | 0.016   | 0.002 | 1.10E-11  | 46.072  |
| rs10090021 | T | C | (0.021) | 0.004 | 3.30E-08  | 30.501  |
| rs10116976 | C | T | 0.019   | 0.002 | 1.50E-17  | 72.766  |
| rs10135413 | G | A | 0.036   | 0.003 | 1.80E-35  | 154.486 |
| rs10139199 | T | G | 0.014   | 0.002 | 3.00E-08  | 30.724  |
| rs10140668 | T | C | 0.022   | 0.003 | 1.80E-14  | 58.687  |
| rs10174    | G | A | (0.017) | 0.002 | 1.00E-15  | 64.386  |
| rs10274404 | A | G | 0.013   | 0.002 | 3.50E-08  | 30.399  |
| rs10447226 | T | G | (0.016) | 0.002 | 3.50E-12  | 48.380  |

|             |   |   |         |       |           |          |
|-------------|---|---|---------|-------|-----------|----------|
| rs10457632  | G | A | (0.079) | 0.002 | 1.00E-200 | 1008.180 |
| rs10458728  | C | T | (0.020) | 0.002 | 2.20E-17  | 71.954   |
| rs1047891   | A | C | (0.029) | 0.002 | 1.10E-37  | 164.549  |
| rs10510412  | A | G | 0.018   | 0.002 | 1.10E-13  | 55.151   |
| rs1059196   | T | C | (0.031) | 0.002 | 3.40E-36  | 157.794  |
| rs10758481  | C | T | (0.028) | 0.002 | 5.40E-39  | 170.634  |
| rs10766373  | A | G | (0.014) | 0.002 | 1.20E-10  | 41.480   |
| rs10774405  | A | G | (0.048) | 0.002 | 8.71E-114 | 513.970  |
| rs10817007  | G | T | 0.023   | 0.003 | 3.20E-13  | 53.082   |
| rs10820606  | C | A | 0.050   | 0.003 | 2.10E-87  | 392.727  |
| rs10821128  | C | T | (0.014) | 0.002 | 1.30E-10  | 41.267   |
| rs10864368  | C | T | 0.025   | 0.002 | 2.00E-33  | 145.116  |
| rs10876550  | A | G | 0.053   | 0.002 | 1.70E-139 | 632.101  |
| rs10876988  | A | G | (0.013) | 0.002 | 9.10E-10  | 37.510   |
| rs10886430  | G | A | (0.028) | 0.003 | 8.60E-18  | 73.814   |
| rs10940474  | T | C | (0.014) | 0.002 | 2.00E-10  | 40.469   |
| rs10974815  | T | C | 0.107   | 0.003 | 1.00E-200 | 1505.877 |
| rs10975153  | C | G | (0.015) | 0.002 | 1.90E-10  | 40.533   |
| rs10995455  | A | G | 0.069   | 0.002 | 1.00E-200 | 915.292  |
| rs11000980  | G | A | (0.013) | 0.002 | 1.70E-09  | 36.273   |
| rs11071720  | C | T | 0.042   | 0.002 | 2.60E-72  | 323.425  |
| rs11082304  | T | G | (0.051) | 0.002 | 1.80E-129 | 586.070  |
| rs11088304  | A | G | 0.024   | 0.002 | 1.60E-27  | 118.147  |
| rs11107060  | G | A | 0.028   | 0.003 | 5.90E-22  | 92.761   |
| rs11126598  | G | A | (0.017) | 0.002 | 3.70E-13  | 52.785   |
| rs11129295  | T | C | 0.017   | 0.002 | 1.70E-14  | 58.795   |
| rs11134475  | G | A | (0.020) | 0.002 | 8.40E-20  | 82.948   |
| rs11168249  | C | T | 0.032   | 0.002 | 7.60E-51  | 224.933  |
| rs111904024 | A | G | 0.058   | 0.006 | 4.70E-24  | 102.327  |
| rs11207345  | T | C | (0.015) | 0.003 | 4.90E-08  | 29.740   |
| rs112096491 | T | C | 0.013   | 0.002 | 8.40E-10  | 37.662   |
| rs11225024  | T | A | 0.022   | 0.004 | 5.30E-09  | 34.071   |
| rs11227249  | T | C | (0.026) | 0.002 | 1.50E-32  | 141.188  |
| rs11259186  | G | T | (0.016) | 0.002 | 1.70E-13  | 54.368   |
| rs112770790 | A | G | (0.031) | 0.003 | 6.70E-23  | 97.064   |
| rs113039006 | C | T | (0.017) | 0.003 | 3.20E-10  | 39.541   |
| rs113063027 | A | C | (0.035) | 0.004 | 3.80E-20  | 84.541   |
| rs113146860 | A | G | 0.020   | 0.003 | 3.40E-12  | 48.415   |
| rs113542380 | A | G | (0.071) | 0.004 | 1.20E-68  | 306.555  |
| rs113596940 | C | T | (0.038) | 0.006 | 3.50E-10  | 39.378   |
| rs113693454 | A | T | (0.066) | 0.006 | 2.30E-28  | 121.971  |
| rs113721422 | A | G | 0.049   | 0.004 | 1.80E-35  | 154.451  |
| rs114694170 | C | T | 0.144   | 0.005 | 1.00E-200 | 1024.736 |
| rs114700498 | T | C | (0.035) | 0.005 | 2.20E-13  | 53.860   |
| rs114968084 | A | G | (0.059) | 0.006 | 5.00E-20  | 83.960   |
| rs115243514 | C | G | 0.119   | 0.008 | 5.30E-48  | 211.893  |
| rs115294879 | A | G | 0.029   | 0.005 | 4.30E-08  | 30.015   |
| rs11553699  | G | A | (0.083) | 0.003 | 4.90E-141 | 639.224  |
| rs115566353 | A | G | (0.067) | 0.011 | 4.30E-10  | 38.963   |
| rs11601507  | A | C | (0.034) | 0.004 | 3.10E-16  | 66.717   |

|             |   |   |         |       |          |         |
|-------------|---|---|---------|-------|----------|---------|
| rs116052829 | T | C | 0.031   | 0.003 | 3.10E-19 | 80.373  |
| rs11611855  | T | C | (0.022) | 0.002 | 1.60E-25 | 109.078 |
| rs11627485  | C | T | 0.024   | 0.002 | 1.40E-30 | 132.118 |
| rs11676298  | G | C | 0.029   | 0.003 | 4.30E-28 | 120.779 |
| rs11679328  | T | C | 0.026   | 0.004 | 3.20E-09 | 35.089  |
| rs117078929 | T | A | 0.021   | 0.003 | 8.70E-10 | 37.592  |
| rs117119759 | A | G | (0.050) | 0.006 | 1.70E-14 | 58.881  |
| rs11712335  | C | T | 0.013   | 0.002 | 1.30E-08 | 32.303  |
| rs11734099  | A | G | 0.050   | 0.003 | 4.10E-72 | 322.509 |
| rs11764390  | A | G | 0.024   | 0.002 | 1.10E-28 | 123.422 |
| rs117684519 | T | C | 0.035   | 0.006 | 8.90E-09 | 33.071  |
| rs117857686 | T | C | 0.109   | 0.007 | 1.40E-48 | 214.479 |
| rs118083884 | A | G | (0.059) | 0.009 | 1.50E-10 | 41.081  |
| rs11818463  | C | G | (0.023) | 0.002 | 5.40E-26 | 111.193 |
| rs11841319  | T | C | (0.064) | 0.004 | 3.50E-75 | 336.623 |
| rs11891555  | T | G | 0.014   | 0.002 | 3.10E-10 | 39.593  |
| rs11950562  | C | A | (0.023) | 0.002 | 4.30E-28 | 120.784 |
| rs12000252  | G | A | (0.020) | 0.002 | 5.50E-21 | 88.344  |
| rs12041331  | A | G | 0.034   | 0.004 | 4.20E-20 | 84.330  |
| rs12052715  | G | C | (0.037) | 0.002 | 2.70E-56 | 249.954 |
| rs12118065  | A | G | (0.029) | 0.002 | 2.10E-41 | 181.699 |
| rs12125200  | G | A | 0.032   | 0.002 | 5.20E-42 | 184.443 |
| rs12126199  | T | C | 0.050   | 0.006 | 5.20E-18 | 74.799  |
| rs12139095  | C | T | (0.018) | 0.002 | 2.00E-13 | 54.018  |
| rs12149168  | T | G | 0.020   | 0.002 | 9.90E-18 | 73.525  |
| rs12155039  | A | C | (0.034) | 0.002 | 2.00E-58 | 259.666 |
| rs12184308  | A | G | 0.016   | 0.002 | 2.10E-11 | 44.864  |
| rs12239737  | A | T | 0.013   | 0.002 | 2.80E-09 | 35.297  |
| rs12266852  | T | C | 0.024   | 0.003 | 5.30E-12 | 47.567  |
| rs12336065  | A | G | (0.032) | 0.005 | 5.10E-10 | 38.644  |
| rs12376511  | C | T | (0.048) | 0.003 | 6.30E-62 | 275.758 |
| rs12386849  | T | C | (0.015) | 0.002 | 4.50E-11 | 43.375  |
| rs12439144  | A | G | 0.016   | 0.002 | 2.90E-14 | 57.814  |
| rs12451471  | T | C | (0.015) | 0.002 | 5.30E-12 | 47.564  |
| rs12491785  | T | C | (0.023) | 0.002 | 1.70E-27 | 118.086 |
| rs12492695  | G | A | 0.012   | 0.002 | 2.60E-08 | 30.982  |
| rs12533403  | T | C | 0.016   | 0.002 | 1.40E-14 | 59.259  |
| rs12564806  | T | C | (0.039) | 0.002 | 1.90E-56 | 250.662 |
| rs1260326   | C | T | (0.041) | 0.002 | 2.30E-82 | 369.614 |
| rs1260405   | G | A | 0.020   | 0.002 | 3.30E-20 | 84.793  |
| rs12676105  | T | C | (0.018) | 0.002 | 4.30E-18 | 75.167  |
| rs12708514  | G | A | (0.023) | 0.003 | 1.50E-18 | 77.245  |
| rs12762934  | T | C | 0.019   | 0.002 | 3.20E-17 | 71.194  |
| rs12889267  | G | A | 0.016   | 0.003 | 8.80E-09 | 33.094  |
| rs12897841  | T | C | (0.013) | 0.002 | 9.50E-10 | 37.435  |
| rs12909131  | T | C | 0.017   | 0.002 | 1.00E-11 | 46.272  |
| rs12923319  | A | C | 0.016   | 0.002 | 9.60E-11 | 41.910  |
| rs12975577  | T | C | (0.016) | 0.002 | 9.10E-15 | 60.075  |
| rs12979891  | T | C | 0.015   | 0.002 | 3.80E-13 | 52.749  |
| rs12983010  | G | A | 0.048   | 0.004 | 1.40E-30 | 132.100 |

|             |   |   |         |       |           |         |
|-------------|---|---|---------|-------|-----------|---------|
| rs13000644  | G | A | (0.013) | 0.002 | 1.20E-08  | 32.430  |
| rs13084317  | A | G | 0.017   | 0.002 | 2.50E-14  | 58.102  |
| rs13084357  | C | T | 0.045   | 0.004 | 1.10E-32  | 141.718 |
| rs13138724  | A | G | (0.016) | 0.002 | 7.80E-14  | 55.845  |
| rs13150834  | G | T | 0.022   | 0.002 | 1.60E-24  | 104.458 |
| rs13154903  | C | T | (0.024) | 0.003 | 6.70E-13  | 51.639  |
| rs13185488  | A | G | (0.021) | 0.003 | 2.90E-16  | 66.864  |
| rs13191948  | T | C | 0.024   | 0.002 | 6.10E-31  | 133.768 |
| rs13208045  | T | C | (0.030) | 0.003 | 1.80E-18  | 76.950  |
| rs13224082  | T | A | (0.034) | 0.002 | 1.00E-43  | 192.294 |
| rs13266443  | G | C | 0.026   | 0.003 | 3.40E-25  | 107.509 |
| rs13394819  | A | T | 0.017   | 0.002 | 6.40E-14  | 56.234  |
| rs138181113 | T | C | 0.032   | 0.005 | 7.50E-10  | 37.897  |
| rs138866    | A | G | 0.021   | 0.003 | 1.00E-15  | 64.379  |
| rs139974673 | C | T | 0.118   | 0.007 | 2.80E-69  | 309.492 |
| rs140436199 | A | G | (0.045) | 0.005 | 3.00E-23  | 98.655  |
| rs1408711   | G | C | 0.026   | 0.003 | 3.20E-23  | 98.546  |
| rs143822714 | G | A | 0.031   | 0.005 | 1.20E-08  | 32.458  |
| rs143900286 | A | T | (0.112) | 0.010 | 1.70E-30  | 131.732 |
| rs144075040 | C | G | (0.102) | 0.011 | 6.10E-22  | 92.682  |
| rs144317085 | T | A | 0.043   | 0.006 | 3.50E-13  | 52.914  |
| rs144663068 | G | A | (0.018) | 0.003 | 8.10E-09  | 33.256  |
| rs1472265   | C | T | (0.015) | 0.002 | 9.80E-12  | 46.360  |
| rs1476096   | C | A | 0.020   | 0.002 | 1.00E-19  | 82.558  |
| rs148383532 | A | G | (0.018) | 0.003 | 1.80E-09  | 36.188  |
| rs150950100 | T | C | (0.046) | 0.007 | 5.70E-10  | 38.428  |
| rs151234    | C | G | 0.066   | 0.003 | 7.60E-97  | 436.114 |
| rs1569419   | C | T | 0.023   | 0.003 | 1.20E-19  | 82.259  |
| rs160697    | G | A | 0.013   | 0.002 | 3.50E-09  | 34.858  |
| rs1641861   | A | G | 0.035   | 0.005 | 5.10E-12  | 47.634  |
| rs1642764   | T | C | (0.018) | 0.002 | 2.20E-17  | 71.914  |
| rs1645984   | C | T | (0.015) | 0.002 | 2.10E-09  | 35.923  |
| rs165177    | C | T | 0.017   | 0.002 | 3.40E-12  | 48.434  |
| rs1660155   | C | A | (0.013) | 0.002 | 6.20E-09  | 33.773  |
| rs167454    | T | C | (0.016) | 0.003 | 1.80E-10  | 40.723  |
| rs167924    | G | A | 0.021   | 0.002 | 4.70E-22  | 93.199  |
| rs16943595  | C | G | (0.021) | 0.003 | 2.30E-12  | 49.173  |
| rs17093381  | G | A | (0.016) | 0.003 | 5.10E-09  | 34.132  |
| rs17138723  | G | C | (0.031) | 0.003 | 9.50E-33  | 142.040 |
| rs1716505   | G | C | 0.042   | 0.002 | 5.30E-76  | 340.364 |
| rs17175830  | A | G | 0.036   | 0.003 | 4.90E-47  | 207.461 |
| rs1719271   | G | A | 0.052   | 0.003 | 3.10E-64  | 286.324 |
| rs1727324   | T | A | 0.029   | 0.003 | 7.30E-29  | 124.293 |
| rs17302005  | G | A | 0.018   | 0.003 | 7.00E-11  | 42.515  |
| rs17572109  | A | G | 0.038   | 0.003 | 5.90E-52  | 230.032 |
| rs1768584   | G | A | 0.048   | 0.002 | 7.60E-110 | 495.850 |
| rs17707466  | G | A | (0.019) | 0.003 | 1.60E-11  | 45.390  |
| rs17720826  | A | G | 0.030   | 0.004 | 1.40E-13  | 54.650  |
| rs17758695  | T | C | (0.067) | 0.006 | 6.70E-27  | 115.332 |
| rs178010    | T | A | 0.015   | 0.002 | 4.80E-10  | 38.742  |

|           |   |   |         |       |           |         |
|-----------|---|---|---------|-------|-----------|---------|
| rs1865761 | C | T | (0.014) | 0.002 | 6.90E-11  | 42.550  |
| rs1895490 | A | G | 0.018   | 0.002 | 2.40E-17  | 71.814  |
| rs191378  | A | G | 0.019   | 0.003 | 7.20E-14  | 56.012  |
| rs1924930 | A | T | (0.015) | 0.003 | 8.60E-09  | 33.142  |
| rs198217  | G | T | 0.011   | 0.002 | 4.80E-08  | 29.777  |
| rs1997577 | T | A | (0.018) | 0.003 | 2.00E-09  | 35.956  |
| rs1997719 | T | C | (0.021) | 0.002 | 2.40E-23  | 99.124  |
| rs2015210 | G | T | (0.026) | 0.002 | 1.60E-26  | 113.630 |
| rs2015599 | A | G | (0.045) | 0.002 | 8.99E-101 | 454.150 |
| rs2017372 | T | C | 0.020   | 0.003 | 4.50E-10  | 38.872  |
| rs2038479 | A | C | (0.064) | 0.003 | 4.60E-130 | 588.775 |
| rs2038700 | C | T | 0.016   | 0.002 | 1.30E-13  | 54.910  |
| rs2040395 | C | T | 0.013   | 0.002 | 1.40E-09  | 36.689  |
| rs2068888 | A | G | (0.022) | 0.002 | 4.70E-26  | 111.453 |
| rs2070738 | C | T | (0.014) | 0.002 | 3.00E-10  | 39.658  |
| rs211510  | G | A | (0.014) | 0.002 | 5.30E-11  | 43.059  |
| rs2122403 | A | G | (0.023) | 0.004 | 3.30E-09  | 34.983  |
| rs2133886 | G | T | 0.067   | 0.002 | 1.00E-200 | 956.423 |
| rs218265  | C | T | 0.020   | 0.003 | 1.50E-11  | 45.537  |
| rs2243103 | G | C | 0.074   | 0.004 | 9.60E-75  | 334.590 |
| rs2255531 | A | G | (0.024) | 0.002 | 3.00E-28  | 121.478 |
| rs2274319 | C | T | (0.027) | 0.002 | 3.80E-35  | 153.042 |
| rs2281232 | A | C | (0.024) | 0.004 | 2.10E-08  | 31.443  |
| rs2294921 | T | C | (0.028) | 0.003 | 3.00E-22  | 94.091  |
| rs2295205 | G | C | 0.015   | 0.002 | 9.00E-10  | 37.541  |
| rs2297066 | G | C | 0.052   | 0.002 | 7.20E-98  | 440.817 |
| rs2305769 | C | G | 0.015   | 0.003 | 1.30E-09  | 36.769  |
| rs2321536 | T | C | 0.019   | 0.002 | 4.20E-18  | 75.210  |
| rs2351772 | T | C | 0.016   | 0.002 | 7.90E-14  | 55.833  |
| rs2353701 | C | T | 0.012   | 0.002 | 2.40E-08  | 31.116  |
| rs238911  | A | G | (0.017) | 0.002 | 1.80E-15  | 63.236  |
| rs2389874 | G | A | 0.020   | 0.002 | 9.10E-20  | 82.792  |
| rs2417966 | G | C | 0.017   | 0.002 | 1.50E-12  | 50.088  |
| rs2455425 | C | T | (0.021) | 0.004 | 2.30E-08  | 31.224  |
| rs2475218 | T | C | (0.026) | 0.004 | 9.40E-13  | 50.969  |
| rs2494663 | A | C | (0.021) | 0.002 | 5.90E-24  | 101.865 |
| rs2498244 | C | A | 0.013   | 0.002 | 1.30E-08  | 32.364  |
| rs2520096 | G | A | 0.034   | 0.002 | 1.10E-45  | 201.205 |
| rs2613522 | G | A | (0.015) | 0.002 | 1.30E-10  | 41.243  |
| rs2641443 | A | G | (0.030) | 0.002 | 1.10E-36  | 160.090 |
| rs2689216 | A | G | 0.019   | 0.002 | 7.30E-17  | 69.596  |
| rs2700936 | G | T | 0.017   | 0.002 | 1.50E-15  | 63.677  |
| rs2708421 | T | C | (0.013) | 0.002 | 6.10E-10  | 38.287  |
| rs2724564 | T | G | 0.025   | 0.002 | 2.30E-32  | 140.278 |
| rs2744963 | A | G | (0.028) | 0.003 | 4.30E-27  | 116.202 |
| rs2755214 | G | T | 0.024   | 0.002 | 5.60E-25  | 106.540 |
| rs2758994 | T | C | (0.019) | 0.002 | 2.10E-15  | 62.941  |
| rs2786802 | T | G | (0.018) | 0.003 | 4.90E-11  | 43.221  |
| rs2788500 | G | A | (0.042) | 0.004 | 2.00E-20  | 85.775  |
| rs2797688 | C | T | 0.020   | 0.002 | 9.40E-22  | 91.842  |

|             |   |   |         |       |           |          |
|-------------|---|---|---------|-------|-----------|----------|
| rs2836425   | T | C | 0.038   | 0.003 | 6.90E-34  | 147.257  |
| rs28456     | G | A | 0.040   | 0.002 | 4.20E-68  | 304.100  |
| rs28505677  | G | C | (0.035) | 0.003 | 1.00E-44  | 196.887  |
| rs2900177   | T | C | 0.017   | 0.002 | 3.30E-14  | 57.547   |
| rs2925033   | T | C | (0.015) | 0.002 | 1.70E-12  | 49.838   |
| rs296887    | T | C | 0.015   | 0.002 | 8.60E-10  | 37.616   |
| rs2999157   | A | G | (0.030) | 0.002 | 6.40E-47  | 206.948  |
| rs303968    | C | T | (0.019) | 0.002 | 1.10E-18  | 77.887   |
| rs3122414   | A | G | (0.016) | 0.002 | 9.70E-13  | 50.897   |
| rs34143604  | A | C | 0.016   | 0.002 | 1.50E-13  | 54.582   |
| rs34152163  | C | G | (0.014) | 0.002 | 1.40E-10  | 41.144   |
| rs342299    | T | C | (0.071) | 0.002 | 1.00E-200 | 1104.568 |
| rs34329     | C | G | 0.017   | 0.002 | 1.80E-13  | 54.231   |
| rs34341922  | A | G | 0.023   | 0.002 | 3.80E-27  | 116.451  |
| rs34346558  | C | A | 0.020   | 0.003 | 5.40E-14  | 56.563   |
| rs34524896  | T | C | (0.090) | 0.005 | 1.90E-74  | 333.184  |
| rs34587839  | A | G | 0.017   | 0.003 | 3.70E-09  | 34.755   |
| rs34592828  | A | G | (0.139) | 0.005 | 5.00E-161 | 731.164  |
| rs34651     | T | C | 0.044   | 0.004 | 1.60E-29  | 127.247  |
| rs34750619  | A | G | 0.037   | 0.004 | 3.40E-19  | 80.166   |
| rs34968913  | A | G | (0.019) | 0.003 | 1.60E-14  | 59.033   |
| rs35027951  | G | A | (0.014) | 0.003 | 4.00E-08  | 30.166   |
| rs35069969  | C | G | 0.016   | 0.002 | 2.00E-13  | 54.020   |
| rs35144104  | T | C | 0.076   | 0.002 | 1.00E-200 | 1059.937 |
| rs35258120  | A | G | 0.051   | 0.003 | 1.60E-78  | 351.914  |
| rs35267052  | G | T | 0.026   | 0.003 | 1.40E-13  | 54.681   |
| rs35330522  | A | G | 0.019   | 0.002 | 4.00E-20  | 84.400   |
| rs35355140  | A | C | (0.027) | 0.004 | 1.70E-10  | 40.804   |
| rs35732917  | C | T | (0.016) | 0.002 | 2.80E-12  | 48.842   |
| rs35989952  | C | T | 0.036   | 0.004 | 3.10E-22  | 94.024   |
| rs36034566  | C | A | 0.016   | 0.002 | 6.80E-14  | 56.131   |
| rs36109901  | C | A | 0.063   | 0.002 | 5.11E-155 | 703.543  |
| rs371270656 | A | T | 0.076   | 0.010 | 3.00E-13  | 53.206   |
| rs3731211   | A | T | 0.044   | 0.002 | 1.30E-77  | 347.781  |
| rs3736313   | G | A | (0.015) | 0.002 | 1.60E-10  | 40.904   |
| rs374039502 | A | T | (0.050) | 0.008 | 1.10E-10  | 41.626   |
| rs3742028   | A | G | (0.045) | 0.002 | 1.00E-97  | 440.154  |
| rs3742271   | C | G | 0.017   | 0.002 | 8.60E-15  | 60.200   |
| rs3742321   | C | T | (0.016) | 0.003 | 5.80E-10  | 38.393   |
| rs3760868   | G | T | (0.023) | 0.003 | 1.10E-13  | 55.204   |
| rs3764535   | A | G | 0.020   | 0.002 | 2.80E-21  | 89.678   |
| rs3767812   | A | G | 0.037   | 0.003 | 1.80E-48  | 214.050  |
| rs3771529   | A | G | (0.032) | 0.003 | 5.80E-33  | 143.042  |
| rs3804749   | T | C | (0.037) | 0.002 | 2.70E-68  | 304.983  |
| rs3806233   | A | G | 0.014   | 0.002 | 1.50E-10  | 40.980   |
| rs381500    | A | C | 0.031   | 0.002 | 2.50E-48  | 213.371  |
| rs3865444   | A | C | (0.024) | 0.002 | 1.50E-26  | 113.745  |
| rs3943516   | G | A | 0.015   | 0.002 | 9.50E-12  | 46.436   |
| rs3956381   | A | C | 0.016   | 0.002 | 6.80E-13  | 51.597   |
| rs41266821  | G | A | (0.031) | 0.003 | 1.30E-21  | 91.129   |

|            |   |   |         |       |           |         |
|------------|---|---|---------|-------|-----------|---------|
| rs41375145 | G | A | (0.027) | 0.004 | 4.80E-14  | 56.829  |
| rs4148445  | T | C | 0.074   | 0.004 | 6.80E-84  | 376.626 |
| rs4286082  | T | C | (0.016) | 0.002 | 3.00E-12  | 48.691  |
| rs4357501  | T | C | (0.012) | 0.002 | 1.00E-08  | 32.761  |
| rs4377525  | C | A | (0.028) | 0.002 | 5.80E-31  | 133.865 |
| rs4442541  | G | A | 0.022   | 0.002 | 2.20E-21  | 90.158  |
| rs4449748  | G | A | 0.022   | 0.002 | 1.90E-19  | 81.325  |
| rs4477285  | A | G | 0.018   | 0.002 | 5.30E-17  | 70.226  |
| rs4538653  | C | G | (0.044) | 0.002 | 5.20E-81  | 363.356 |
| rs4588     | T | G | (0.014) | 0.002 | 3.40E-09  | 34.922  |
| rs458857   | A | C | 0.015   | 0.002 | 1.60E-12  | 49.902  |
| rs4670779  | T | C | (0.019) | 0.002 | 1.10E-16  | 68.799  |
| rs4711890  | G | C | 0.029   | 0.002 | 1.60E-34  | 150.179 |
| rs4720246  | G | A | (0.018) | 0.003 | 9.90E-11  | 41.844  |
| rs4754299  | T | C | 0.021   | 0.002 | 6.20E-23  | 97.236  |
| rs4771666  | T | C | 0.015   | 0.003 | 6.20E-09  | 33.785  |
| rs4780355  | C | T | 0.021   | 0.002 | 1.20E-19  | 82.192  |
| rs4783189  | G | A | (0.043) | 0.003 | 1.00E-42  | 187.635 |
| rs4793987  | C | T | (0.013) | 0.002 | 2.20E-09  | 35.807  |
| rs4812449  | G | C | 0.014   | 0.002 | 5.60E-11  | 42.963  |
| rs4815915  | A | G | (0.018) | 0.002 | 1.30E-15  | 63.978  |
| rs4818033  | C | T | (0.020) | 0.002 | 8.40E-18  | 73.847  |
| rs4820013  | C | T | 0.016   | 0.002 | 6.50E-12  | 47.188  |
| rs482246   | G | A | 0.015   | 0.002 | 6.50E-12  | 47.171  |
| rs4846082  | T | C | (0.039) | 0.002 | 4.40E-77  | 345.343 |
| rs4846914  | A | G | 0.028   | 0.002 | 1.20E-37  | 164.474 |
| rs4849845  | A | G | (0.035) | 0.002 | 2.80E-53  | 236.099 |
| rs4858819  | T | C | (0.016) | 0.002 | 7.70E-11  | 42.326  |
| rs4883519  | C | T | 0.012   | 0.002 | 4.90E-09  | 34.221  |
| rs4896117  | C | T | (0.032) | 0.002 | 2.00E-50  | 222.991 |
| rs4902244  | G | A | 0.017   | 0.003 | 6.50E-09  | 33.668  |
| rs4913405  | A | G | 0.018   | 0.002 | 2.00E-13  | 53.989  |
| rs4924839  | G | A | 0.013   | 0.002 | 2.40E-09  | 35.616  |
| rs4937127  | G | A | (0.027) | 0.002 | 5.90E-38  | 165.875 |
| rs4946366  | T | C | (0.017) | 0.003 | 5.00E-09  | 34.186  |
| rs4947490  | G | A | 0.017   | 0.002 | 1.50E-13  | 54.607  |
| rs4965426  | A | G | (0.041) | 0.003 | 3.50E-42  | 185.235 |
| rs4972760  | G | A | 0.020   | 0.003 | 4.00E-10  | 39.132  |
| rs4979859  | T | G | 0.019   | 0.002 | 1.90E-15  | 63.191  |
| rs55664157 | A | T | (0.031) | 0.003 | 6.70E-22  | 92.505  |
| rs55708816 | A | G | 0.032   | 0.003 | 9.70E-21  | 87.228  |
| rs55773542 | T | C | (0.027) | 0.003 | 6.50E-15  | 60.730  |
| rs55794721 | A | G | (0.036) | 0.002 | 2.10E-64  | 287.170 |
| rs55879786 | A | G | (0.028) | 0.003 | 4.60E-25  | 106.926 |
| rs56088754 | G | A | 0.017   | 0.002 | 5.50E-14  | 56.543  |
| rs57273488 | A | G | 0.041   | 0.006 | 1.40E-10  | 41.207  |
| rs57486725 | G | T | (0.050) | 0.004 | 9.60E-37  | 160.327 |
| rs57843631 | T | C | (0.235) | 0.008 | 3.30E-189 | 860.800 |
| rs58241613 | A | T | 0.051   | 0.007 | 1.60E-13  | 54.394  |
| rs583306   | T | C | 0.022   | 0.002 | 1.00E-19  | 82.564  |

|            |   |   |         |       |           |         |
|------------|---|---|---------|-------|-----------|---------|
| rs58722186 | T | C | 0.023   | 0.002 | 8.10E-24  | 101.248 |
| rs58954593 | T | C | (0.021) | 0.003 | 1.90E-14  | 58.634  |
| rs594942   | C | T | 0.018   | 0.002 | 1.50E-16  | 68.136  |
| rs60188612 | A | G | 0.015   | 0.003 | 1.70E-08  | 31.754  |
| rs60232238 | C | G | (0.017) | 0.002 | 5.20E-12  | 47.593  |
| rs6031907  | A | G | (0.013) | 0.002 | 5.90E-10  | 38.357  |
| rs6035274  | C | T | (0.014) | 0.002 | 2.30E-11  | 44.729  |
| rs60384564 | C | A | (0.054) | 0.005 | 8.30E-23  | 96.633  |
| rs6044953  | A | G | (0.013) | 0.002 | 3.20E-09  | 35.077  |
| rs6045612  | T | C | (0.043) | 0.002 | 7.60E-71  | 316.694 |
| rs6060976  | A | G | (0.034) | 0.002 | 2.00E-47  | 209.248 |
| rs6066390  | T | C | 0.016   | 0.003 | 3.10E-10  | 39.589  |
| rs60757417 | G | C | (0.080) | 0.004 | 1.70E-70  | 315.143 |
| rs61025394 | A | G | (0.017) | 0.003 | 3.90E-11  | 43.666  |
| rs6103669  | A | G | (0.018) | 0.002 | 5.30E-14  | 56.598  |
| rs6140670  | A | G | (0.016) | 0.002 | 8.00E-12  | 46.777  |
| rs6141     | T | C | 0.060   | 0.002 | 1.30E-181 | 825.916 |
| rs61608280 | G | A | 0.014   | 0.002 | 6.90E-11  | 42.555  |
| rs61781290 | G | A | 0.027   | 0.002 | 5.80E-30  | 129.307 |
| rs619011   | G | A | 0.015   | 0.002 | 9.60E-11  | 41.903  |
| rs61966631 | C | T | 0.027   | 0.002 | 1.30E-35  | 155.184 |
| rs61986599 | A | G | (0.020) | 0.002 | 1.50E-18  | 77.198  |
| rs62002318 | G | A | 0.014   | 0.002 | 2.10E-11  | 44.848  |
| rs62022865 | C | A | (0.021) | 0.003 | 6.20E-12  | 47.259  |
| rs62113963 | T | C | (0.015) | 0.002 | 1.90E-09  | 36.043  |
| rs62217799 | T | G | 0.018   | 0.002 | 5.60E-16  | 65.577  |
| rs62241230 | T | C | (0.017) | 0.002 | 3.40E-14  | 57.477  |
| rs62397627 | G | A | 0.030   | 0.003 | 4.40E-32  | 138.991 |
| rs62491380 | G | A | (0.028) | 0.004 | 4.60E-15  | 61.410  |
| rs62523770 | T | G | 0.025   | 0.003 | 8.90E-21  | 87.397  |
| rs635887   | G | T | (0.017) | 0.002 | 4.40E-14  | 56.962  |
| rs6420998  | A | G | 0.038   | 0.004 | 1.00E-25  | 109.900 |
| rs6439675  | A | G | 0.018   | 0.002 | 5.00E-17  | 70.346  |
| rs6444571  | C | T | 0.022   | 0.002 | 8.20E-20  | 83.012  |
| rs645901   | C | T | 0.037   | 0.003 | 1.70E-32  | 140.850 |
| rs646809   | T | C | 0.018   | 0.003 | 2.20E-12  | 49.298  |
| rs648103   | C | T | 0.017   | 0.002 | 2.50E-14  | 58.097  |
| rs6533483  | A | G | (0.026) | 0.002 | 2.10E-33  | 145.027 |
| rs6537255  | C | T | 0.018   | 0.002 | 4.10E-17  | 70.748  |
| rs6546909  | T | A | 0.024   | 0.003 | 2.20E-16  | 67.426  |
| rs655029   | A | G | 0.069   | 0.002 | 8.49E-192 | 872.701 |
| rs6554595  | T | C | 0.014   | 0.002 | 1.80E-11  | 45.192  |
| rs6556405  | C | T | (0.027) | 0.002 | 5.40E-29  | 124.866 |
| rs656163   | G | A | (0.012) | 0.002 | 4.90E-08  | 29.737  |
| rs6572992  | G | C | 0.014   | 0.002 | 1.70E-10  | 40.821  |
| rs6588634  | T | C | 0.023   | 0.003 | 2.60E-11  | 44.429  |
| rs658974   | T | C | (0.032) | 0.004 | 5.30E-14  | 56.623  |
| rs6592965  | A | G | 0.016   | 0.002 | 1.70E-14  | 58.844  |
| rs6593513  | C | T | (0.013) | 0.002 | 5.70E-09  | 33.944  |
| rs6664992  | G | A | 0.012   | 0.002 | 3.50E-08  | 30.417  |

|            |   |   |         |       |           |          |
|------------|---|---|---------|-------|-----------|----------|
| rs669556   | T | C | 0.021   | 0.003 | 8.00E-16  | 64.877   |
| rs6696074  | T | C | 0.015   | 0.002 | 8.40E-12  | 46.662   |
| rs6706095  | G | T | 0.023   | 0.002 | 1.10E-20  | 87.006   |
| rs67149561 | C | G | 0.025   | 0.003 | 3.90E-18  | 75.362   |
| rs6786088  | C | T | (0.032) | 0.002 | 1.00E-46  | 205.977  |
| rs6793096  | G | A | (0.017) | 0.003 | 1.00E-10  | 41.806   |
| rs6815294  | A | G | 0.022   | 0.002 | 6.70E-24  | 101.631  |
| rs6863275  | C | A | (0.024) | 0.004 | 2.10E-10  | 40.367   |
| rs6880286  | T | C | 0.019   | 0.002 | 3.50E-19  | 80.131   |
| rs6883116  | C | T | (0.012) | 0.002 | 8.80E-09  | 33.090   |
| rs6883827  | G | A | 0.028   | 0.002 | 3.00E-39  | 171.804  |
| rs6916257  | A | C | (0.031) | 0.005 | 8.40E-10  | 37.665   |
| rs6985149  | G | A | (0.019) | 0.002 | 1.00E-16  | 68.909   |
| rs6993770  | T | A | (0.070) | 0.002 | 1.60E-196 | 894.394  |
| rs7000170  | A | G | (0.021) | 0.002 | 4.30E-19  | 79.727   |
| rs7010394  | C | T | 0.018   | 0.002 | 2.10E-17  | 72.026   |
| rs706025   | A | C | 0.012   | 0.002 | 6.00E-09  | 33.846   |
| rs7096937  | C | T | (0.013) | 0.002 | 1.70E-08  | 31.759   |
| rs7111926  | A | C | (0.027) | 0.002 | 8.60E-33  | 142.244  |
| rs7113149  | T | C | (0.021) | 0.004 | 3.20E-09  | 35.076   |
| rs7115672  | C | T | 0.023   | 0.004 | 2.20E-10  | 40.238   |
| rs7117878  | A | C | 0.016   | 0.002 | 8.10E-13  | 51.266   |
| rs7124681  | A | C | (0.025) | 0.002 | 3.10E-31  | 135.135  |
| rs71265190 | A | G | (0.016) | 0.003 | 6.90E-11  | 42.556   |
| rs7213617  | G | A | (0.020) | 0.002 | 7.40E-20  | 83.204   |
| rs7223589  | C | T | 0.017   | 0.002 | 6.50E-15  | 60.747   |
| rs7233932  | G | C | 0.015   | 0.002 | 1.20E-10  | 41.390   |
| rs7249692  | C | T | (0.029) | 0.002 | 2.20E-39  | 172.445  |
| rs7252328  | G | A | 0.025   | 0.003 | 2.90E-17  | 71.434   |
| rs7253820  | G | A | 0.022   | 0.002 | 3.90E-25  | 107.240  |
| rs7254827  | T | A | (0.027) | 0.003 | 6.50E-27  | 115.390  |
| rs72627500 | G | A | (0.020) | 0.003 | 1.00E-10  | 41.757   |
| rs72687006 | C | T | 0.062   | 0.008 | 2.60E-13  | 53.527   |
| rs72725158 | C | T | (0.048) | 0.003 | 3.30E-62  | 277.025  |
| rs72760940 | T | C | (0.027) | 0.004 | 4.50E-11  | 43.393   |
| rs72917118 | T | C | (0.018) | 0.003 | 7.00E-10  | 38.011   |
| rs7294800  | A | C | 0.019   | 0.003 | 8.70E-09  | 33.107   |
| rs72969820 | T | C | (0.030) | 0.003 | 5.70E-19  | 79.167   |
| rs72996108 | A | C | (0.026) | 0.004 | 1.10E-13  | 55.098   |
| rs73036520 | C | G | (0.049) | 0.002 | 2.30E-88  | 397.148  |
| rs73037185 | T | C | 0.024   | 0.004 | 3.50E-09  | 34.870   |
| rs7309426  | A | G | 0.018   | 0.003 | 7.40E-11  | 42.412   |
| rs73140125 | G | A | 0.017   | 0.003 | 4.30E-08  | 29.996   |
| rs73226473 | C | T | 0.018   | 0.003 | 3.20E-10  | 39.571   |
| rs7332115  | G | T | 0.026   | 0.002 | 8.50E-32  | 137.700  |
| rs73617438 | A | G | (0.017) | 0.003 | 4.90E-08  | 29.742   |
| rs7385804  | A | C | 0.027   | 0.002 | 2.80E-34  | 149.065  |
| rs74227709 | A | G | (0.136) | 0.004 | 1.00E-200 | 1111.476 |
| rs74403919 | A | T | 0.016   | 0.003 | 8.50E-09  | 33.162   |
| rs74519049 | T | C | 0.032   | 0.004 | 3.50E-14  | 57.417   |

|            |   |   |         |       |           |         |
|------------|---|---|---------|-------|-----------|---------|
| rs74528993 | A | G | 0.025   | 0.004 | 1.10E-08  | 32.635  |
| rs75065607 | C | T | (0.043) | 0.008 | 3.00E-08  | 30.727  |
| rs75107793 | A | G | 0.114   | 0.004 | 6.61E-169 | 767.392 |
| rs7516301  | C | T | 0.017   | 0.002 | 1.20E-15  | 64.077  |
| rs7532552  | G | A | (0.013) | 0.002 | 1.30E-08  | 32.284  |
| rs75511465 | A | G | (0.067) | 0.008 | 1.60E-15  | 63.487  |
| rs75659987 | A | T | 0.038   | 0.006 | 1.40E-10  | 41.224  |
| rs7571154  | T | C | 0.015   | 0.002 | 2.70E-10  | 39.896  |
| rs7577057  | C | T | 0.019   | 0.002 | 2.20E-19  | 81.064  |
| rs7585866  | G | A | 0.018   | 0.002 | 4.00E-17  | 70.762  |
| rs7630419  | A | G | (0.015) | 0.002 | 5.80E-13  | 51.909  |
| rs7641325  | A | G | (0.036) | 0.002 | 3.40E-65  | 290.754 |
| rs76445378 | T | C | 0.100   | 0.008 | 9.80E-33  | 141.991 |
| rs76452111 | T | A | (0.057) | 0.005 | 5.30E-27  | 115.766 |
| rs76496105 | G | C | (0.028) | 0.004 | 1.30E-14  | 59.320  |
| rs7652441  | G | A | 0.016   | 0.003 | 8.10E-10  | 37.732  |
| rs7655560  | A | G | (0.030) | 0.005 | 2.80E-10  | 39.829  |
| rs7658679  | T | C | (0.015) | 0.002 | 1.90E-12  | 49.575  |
| rs7660913  | C | G | 0.028   | 0.004 | 2.80E-10  | 39.816  |
| rs7671752  | T | C | (0.015) | 0.002 | 1.20E-12  | 50.425  |
| rs76840964 | G | A | (0.024) | 0.003 | 8.30E-14  | 55.726  |
| rs76859665 | T | G | (0.034) | 0.005 | 9.80E-10  | 37.368  |
| rs7705526  | A | C | 0.044   | 0.002 | 3.40E-82  | 368.812 |
| rs7706078  | T | C | (0.014) | 0.002 | 1.80E-10  | 40.674  |
| rs7760090  | G | A | (0.023) | 0.003 | 1.20E-17  | 73.133  |
| rs777490   | T | C | (0.015) | 0.002 | 3.10E-10  | 39.633  |
| rs77808283 | A | G | 0.048   | 0.006 | 3.30E-18  | 75.705  |
| rs77844289 | C | T | 0.076   | 0.004 | 2.50E-84  | 378.634 |
| rs7789916  | A | G | (0.021) | 0.002 | 5.60E-19  | 79.208  |
| rs78157248 | C | T | 0.028   | 0.004 | 2.20E-11  | 44.758  |
| rs78261031 | A | G | (0.030) | 0.004 | 2.20E-11  | 44.828  |
| rs7830416  | A | T | 0.020   | 0.003 | 2.10E-10  | 40.413  |
| rs7833924  | G | A | 0.042   | 0.002 | 2.10E-85  | 383.587 |
| rs78376243 | T | C | 0.020   | 0.003 | 1.70E-11  | 45.296  |
| rs7843024  | A | G | 0.016   | 0.002 | 1.30E-13  | 54.862  |
| rs7851531  | G | A | (0.012) | 0.002 | 4.80E-08  | 29.797  |
| rs7865719  | G | A | (0.041) | 0.002 | 4.70E-85  | 381.935 |
| rs7870898  | T | C | 0.028   | 0.002 | 1.20E-35  | 155.355 |
| rs78909033 | A | G | 0.062   | 0.003 | 1.70E-91  | 411.494 |
| rs78973710 | G | A | 0.021   | 0.003 | 7.90E-10  | 37.787  |
| rs79007502 | C | T | 0.091   | 0.005 | 2.70E-62  | 277.459 |
| rs7912685  | C | T | 0.021   | 0.003 | 3.00E-12  | 48.666  |
| rs79541578 | A | G | (0.020) | 0.003 | 3.70E-15  | 61.837  |
| rs79716587 | A | G | (0.022) | 0.003 | 4.50E-12  | 47.877  |
| rs80012730 | C | A | (0.042) | 0.004 | 4.70E-25  | 106.903 |
| rs80054178 | C | T | 0.129   | 0.007 | 4.20E-73  | 327.057 |
| rs8049394  | A | G | (0.022) | 0.002 | 5.00E-20  | 83.985  |
| rs8050500  | C | T | 0.018   | 0.002 | 1.10E-16  | 68.776  |
| rs8072157  | A | T | (0.020) | 0.003 | 1.40E-14  | 59.260  |
| rs8081858  | T | C | (0.062) | 0.002 | 5.79E-192 | 873.450 |

|            |   |   |         |       |          |         |        |         |
|------------|---|---|---------|-------|----------|---------|--------|---------|
| rs8098454  | T | C | 0.025   | 0.004 | 1.30E-11 | 45.824  |        |         |
| rs8106212  | T | C | (0.091) | 0.010 | 4.10E-20 | 84.380  |        |         |
| rs8128904  | T | C | (0.017) | 0.003 | 6.70E-09 | 33.613  |        |         |
| rs8129054  | G | A | 0.020   | 0.002 | 3.40E-16 | 66.581  |        |         |
| rs8178824  | T | C | 0.100   | 0.006 | 3.20E-59 | 263.358 |        |         |
| rs855791   | G | A | (0.028) | 0.002 | 7.00E-38 | 165.525 |        |         |
| rs896156   | C | T | (0.035) | 0.004 | 5.20E-21 | 88.450  |        |         |
| rs9266658  | A | G | 0.059   | 0.003 | 4.40E-96 | 432.586 |        |         |
| rs9294458  | A | G | (0.012) | 0.002 | 2.40E-08 | 31.165  |        |         |
| rs9371672  | G | C | (0.013) | 0.002 | 5.90E-09 | 33.855  |        |         |
| rs9382146  | A | G | (0.025) | 0.002 | 3.30E-32 | 139.592 |        |         |
| rs9400379  | G | A | 0.019   | 0.002 | 5.50E-19 | 79.258  |        |         |
| rs9410195  | T | C | (0.066) | 0.004 | 1.90E-50 | 223.155 |        |         |
| rs947001   | G | A | (0.017) | 0.002 | 3.10E-14 | 57.652  |        |         |
| rs950965   | G | A | 0.023   | 0.002 | 1.30E-25 | 109.382 |        |         |
| rs9535495  | T | C | (0.014) | 0.002 | 1.70E-10 | 40.733  |        |         |
| rs9704476  | C | T | (0.015) | 0.002 | 2.20E-12 | 49.316  |        |         |
| rs9809116  | G | A | 0.020   | 0.002 | 1.70E-20 | 86.136  |        |         |
| rs9828304  | A | G | 0.012   | 0.002 | 6.30E-09 | 33.733  |        |         |
| rs9829114  | A | G | (0.023) | 0.002 | 5.90E-26 | 111.022 |        |         |
| rs984796   | G | T | (0.037) | 0.002 | 7.60E-69 | 307.518 |        |         |
| rs9879207  | C | T | 0.017   | 0.003 | 7.80E-10 | 37.822  |        |         |
| rs9912392  | C | G | (0.032) | 0.002 | 3.30E-50 | 222.030 |        |         |
| rs9916458  | A | G | 0.024   | 0.003 | 5.40E-20 | 83.838  |        |         |
| rs9919955  | C | G | (0.029) | 0.003 | 8.90E-25 | 105.623 |        |         |
| rs9947269  | C | T | 0.031   | 0.003 | 3.00E-23 | 98.636  |        |         |
| rs9950562  | T | C | (0.015) | 0.002 | 4.60E-12 | 47.862  |        |         |
| rs9967130  | G | A | 0.014   | 0.002 | 1.20E-09 | 36.912  |        |         |
| rs1002707  | T | C | (0.028) | 0.002 | 4.20E-30 | 129.947 | 66.661 | 129.169 |
| rs10048745 | A | G | 0.032   | 0.002 | 3.20E-39 | 171.689 |        |         |
| rs10064543 | A | G | 0.018   | 0.002 | 2.60E-15 | 62.553  |        |         |
| rs10112386 | C | T | (0.016) | 0.003 | 9.90E-09 | 32.859  |        |         |
| rs10174    | G | A | (0.018) | 0.002 | 1.40E-16 | 68.319  |        |         |
| rs10180658 | T | C | 0.024   | 0.002 | 2.10E-28 | 122.161 |        |         |
| rs10188795 | T | G | 0.028   | 0.005 | 4.20E-09 | 34.542  |        |         |
| rs10240931 | C | G | (0.029) | 0.003 | 5.40E-18 | 74.747  |        |         |
| rs1033686  | A | G | (0.038) | 0.003 | 1.30E-37 | 164.353 |        |         |
| rs1034491  | A | G | (0.020) | 0.003 | 5.80E-14 | 56.423  |        |         |
| rs1034564  | T | C | 0.025   | 0.002 | 5.90E-27 | 115.565 |        |         |
| rs10400322 | T | C | (0.013) | 0.002 | 2.80E-09 | 35.326  |        |         |
| rs10447226 | T | G | (0.016) | 0.002 | 5.20E-12 | 47.618  |        |         |
| rs10456113 | G | T | 0.027   | 0.003 | 6.00E-18 | 74.508  |        |         |
| rs1048155  | G | C | (0.013) | 0.002 | 4.50E-09 | 34.389  |        |         |
| rs10505545 | T | C | 0.018   | 0.002 | 7.30E-17 | 69.578  |        |         |
| rs10510412 | A | G | 0.022   | 0.002 | 1.10E-18 | 77.946  |        |         |
| rs10512472 | C | T | 0.042   | 0.003 | 1.10E-50 | 224.169 |        |         |
| rs1074958  | T | C | (0.029) | 0.004 | 1.50E-15 | 63.606  |        |         |
| rs1079227  | G | C | (0.027) | 0.002 | 8.30E-28 | 119.461 |        |         |
| rs10818963 | A | T | (0.021) | 0.002 | 5.90E-21 | 88.201  |        |         |
| rs10849819 | T | C | (0.019) | 0.002 | 1.30E-17 | 72.986  |        |         |

Plateletcrit

|             |   |   |         |       |           |          |
|-------------|---|---|---------|-------|-----------|----------|
| rs10864368  | C | T | 0.034   | 0.002 | 6.60E-58  | 257.303  |
| rs10875730  | T | A | 0.018   | 0.003 | 1.60E-12  | 49.901   |
| rs10882179  | T | C | (0.013) | 0.002 | 5.40E-10  | 38.545   |
| rs10888263  | G | T | (0.014) | 0.002 | 4.10E-11  | 43.569   |
| rs10893871  | C | T | (0.026) | 0.002 | 2.50E-30  | 130.978  |
| rs10940072  | A | G | (0.015) | 0.002 | 1.40E-11  | 45.615   |
| rs10940474  | T | C | (0.015) | 0.002 | 6.90E-12  | 47.049   |
| rs10974874  | T | A | 0.032   | 0.003 | 1.90E-30  | 131.513  |
| rs10992746  | C | T | (0.013) | 0.002 | 6.60E-09  | 33.662   |
| rs1105314   | G | A | 0.015   | 0.002 | 1.90E-11  | 45.026   |
| rs11064156  | C | T | (0.018) | 0.002 | 3.30E-17  | 71.130   |
| rs11076515  | A | G | 0.018   | 0.002 | 1.80E-13  | 54.170   |
| rs11082304  | T | G | (0.033) | 0.002 | 3.50E-55  | 244.792  |
| rs11107039  | A | G | 0.024   | 0.003 | 4.80E-17  | 70.419   |
| rs11126249  | G | T | (0.016) | 0.003 | 2.40E-09  | 35.612   |
| rs11168249  | C | T | 0.026   | 0.002 | 4.70E-35  | 152.591  |
| rs111938639 | C | T | 0.017   | 0.003 | 1.20E-08  | 32.432   |
| rs11225024  | T | A | 0.027   | 0.004 | 3.90E-12  | 48.176   |
| rs112326923 | C | T | 0.085   | 0.009 | 4.00E-22  | 93.517   |
| rs11240572  | A | C | 0.037   | 0.006 | 9.50E-09  | 32.939   |
| rs112423577 | T | C | 0.040   | 0.007 | 5.80E-09  | 33.893   |
| rs112969588 | C | T | (0.037) | 0.004 | 2.40E-23  | 99.082   |
| rs113542380 | A | G | (0.070) | 0.004 | 3.00E-67  | 300.201  |
| rs114694170 | C | T | 0.090   | 0.005 | 4.70E-87  | 391.111  |
| rs11504523  | G | A | 0.034   | 0.004 | 5.00E-16  | 65.813   |
| rs115446347 | C | T | 0.080   | 0.004 | 2.00E-70  | 314.717  |
| rs11553699  | G | A | 0.118   | 0.003 | 1.00E-200 | 1273.999 |
| rs115566353 | A | G | (0.065) | 0.011 | 2.90E-09  | 35.233   |
| rs116052829 | T | C | 0.031   | 0.003 | 7.80E-19  | 78.539   |
| rs11615482  | A | C | 0.021   | 0.003 | 1.90E-15  | 63.117   |
| rs11655709  | C | T | 0.028   | 0.003 | 3.80E-16  | 66.346   |
| rs11676298  | G | C | 0.038   | 0.003 | 1.30E-44  | 196.312  |
| rs11679328  | T | C | 0.029   | 0.004 | 3.00E-11  | 44.207   |
| rs11715288  | C | T | 0.027   | 0.002 | 1.80E-36  | 159.036  |
| rs11745324  | A | G | 0.017   | 0.003 | 5.60E-11  | 42.951   |
| rs11757155  | T | C | (0.015) | 0.002 | 5.40E-12  | 47.525   |
| rs117857686 | T | C | 0.118   | 0.008 | 1.30E-55  | 246.836  |
| rs11794772  | A | G | 0.034   | 0.002 | 1.30E-45  | 200.921  |
| rs11818463  | C | G | (0.029) | 0.002 | 2.30E-38  | 167.784  |
| rs11841319  | T | C | (0.059) | 0.004 | 8.20E-64  | 284.425  |
| rs1185670   | T | C | (0.022) | 0.003 | 2.60E-18  | 76.205   |
| rs11876150  | C | T | (0.037) | 0.005 | 9.60E-15  | 59.977   |
| rs12050628  | A | G | 0.015   | 0.002 | 6.70E-10  | 38.116   |
| rs12052715  | G | C | (0.052) | 0.002 | 4.80E-108 | 487.571  |
| rs12155039  | A | C | (0.050) | 0.002 | 2.30E-120 | 544.171  |
| rs12220411  | A | G | 0.016   | 0.003 | 1.90E-09  | 36.055   |
| rs12223381  | T | C | 0.031   | 0.002 | 8.50E-48  | 210.963  |
| rs12223916  | G | C | (0.039) | 0.004 | 5.70E-28  | 120.210  |
| rs12371562  | T | C | 0.028   | 0.005 | 5.10E-09  | 34.137   |
| rs12376511  | C | T | (0.056) | 0.003 | 1.20E-85  | 384.597  |

|             |   |   |         |       |          |         |
|-------------|---|---|---------|-------|----------|---------|
| rs12448829  | A | G | 0.022   | 0.002 | 1.90E-23 | 99.611  |
| rs12484795  | C | A | (0.024) | 0.003 | 9.70E-17 | 69.028  |
| rs12491937  | G | A | (0.042) | 0.002 | 7.70E-87 | 390.135 |
| rs12523094  | C | T | 0.018   | 0.002 | 9.10E-17 | 69.150  |
| rs12536349  | A | G | 0.027   | 0.004 | 3.60E-10 | 39.304  |
| rs12564806  | T | C | (0.034) | 0.002 | 1.50E-41 | 182.344 |
| rs12565181  | A | G | 0.019   | 0.003 | 2.60E-09 | 35.435  |
| rs12574844  | A | G | (0.026) | 0.004 | 8.70E-10 | 37.594  |
| rs1260326   | C | T | (0.038) | 0.002 | 2.20E-67 | 300.763 |
| rs12635205  | G | A | 0.022   | 0.002 | 3.90E-24 | 102.705 |
| rs12668458  | C | T | (0.012) | 0.002 | 3.40E-08 | 30.473  |
| rs12680058  | T | C | (0.017) | 0.003 | 2.30E-09 | 35.698  |
| rs12712068  | G | A | 0.023   | 0.002 | 3.80E-25 | 107.334 |
| rs12721051  | G | C | (0.034) | 0.003 | 8.30E-37 | 160.605 |
| rs12885460  | C | T | (0.015) | 0.002 | 4.00E-12 | 48.101  |
| rs12889267  | G | A | 0.021   | 0.003 | 4.30E-13 | 52.510  |
| rs12898998  | A | C | 0.012   | 0.002 | 8.30E-09 | 33.204  |
| rs12910114  | T | C | 0.020   | 0.002 | 1.70E-17 | 72.502  |
| rs1297257   | G | A | (0.023) | 0.002 | 5.20E-26 | 111.271 |
| rs12977252  | G | A | 0.024   | 0.004 | 2.30E-10 | 40.170  |
| rs13084317  | A | G | 0.017   | 0.002 | 7.30E-14 | 55.995  |
| rs13118519  | T | C | (0.023) | 0.002 | 3.40E-26 | 112.094 |
| rs13224082  | T | A | (0.023) | 0.002 | 1.30E-20 | 86.715  |
| rs13260832  | G | A | 0.019   | 0.003 | 1.10E-12 | 50.634  |
| rs13274496  | A | G | 0.024   | 0.003 | 1.90E-21 | 90.421  |
| rs1334577   | A | G | (0.021) | 0.002 | 7.70E-17 | 69.496  |
| rs1354034   | C | T | 0.025   | 0.002 | 7.30E-31 | 133.425 |
| rs1364076   | G | A | 0.021   | 0.002 | 1.10E-19 | 82.462  |
| rs138901672 | A | G | (0.054) | 0.006 | 1.40E-18 | 77.381  |
| rs139963228 | A | G | 0.045   | 0.008 | 3.60E-08 | 30.329  |
| rs139974673 | C | T | 0.123   | 0.007 | 3.10E-74 | 332.240 |
| rs140255439 | T | C | 0.056   | 0.010 | 3.00E-08 | 30.681  |
| rs140294987 | A | T | 0.023   | 0.003 | 8.80E-13 | 51.096  |
| rs140436199 | A | G | (0.054) | 0.005 | 4.80E-32 | 138.815 |
| rs140709290 | T | A | 0.030   | 0.005 | 1.10E-09 | 37.135  |
| rs1434282   | T | C | 0.049   | 0.002 | 1.40E-96 | 434.827 |
| rs143705965 | T | C | 0.040   | 0.006 | 7.60E-10 | 37.865  |
| rs144317085 | T | A | 0.057   | 0.006 | 4.80E-22 | 93.178  |
| rs1461102   | C | T | 0.015   | 0.003 | 4.20E-08 | 30.038  |
| rs146207734 | T | A | (0.088) | 0.009 | 3.10E-22 | 94.031  |
| rs146940154 | A | G | (0.067) | 0.008 | 6.80E-19 | 78.836  |
| rs1472265   | C | T | (0.013) | 0.002 | 1.90E-09 | 36.064  |
| rs147412694 | A | G | (0.020) | 0.003 | 1.40E-11 | 45.609  |
| rs150156796 | C | T | 0.039   | 0.006 | 2.00E-11 | 44.988  |
| rs150568286 | A | G | (0.114) | 0.010 | 3.10E-31 | 135.103 |
| rs150665764 | C | G | 0.047   | 0.008 | 1.10E-08 | 32.710  |
| rs150897705 | A | T | 0.029   | 0.005 | 1.30E-09 | 36.806  |
| rs151165225 | T | C | (0.039) | 0.002 | 3.60E-56 | 249.334 |
| rs151234    | C | G | 0.041   | 0.003 | 2.70E-38 | 167.419 |
| rs1539019   | C | A | 0.019   | 0.002 | 6.20E-18 | 74.449  |

|             |   |   |         |       |           |          |
|-------------|---|---|---------|-------|-----------|----------|
| rs1547247   | A | G | 0.080   | 0.002 | 1.00E-200 | 1207.781 |
| rs1555405   | A | G | (0.067) | 0.002 | 2.70E-163 | 741.559  |
| rs1556739   | T | G | 0.017   | 0.003 | 7.20E-09  | 33.480   |
| rs156355    | C | T | 0.044   | 0.002 | 4.80E-91  | 409.443  |
| rs1569419   | C | T | 0.042   | 0.003 | 1.90E-61  | 273.600  |
| rs158638    | A | G | (0.012) | 0.002 | 5.80E-09  | 33.914   |
| rs160697    | G | A | 0.017   | 0.002 | 1.30E-14  | 59.377   |
| rs1642764   | T | C | (0.017) | 0.002 | 8.70E-15  | 60.174   |
| rs165177    | C | T | 0.020   | 0.002 | 2.00E-16  | 67.613   |
| rs16858720  | G | A | 0.046   | 0.003 | 2.10E-45  | 199.984  |
| rs16928078  | T | C | (0.019) | 0.003 | 3.40E-08  | 30.460   |
| rs1702840   | T | C | (0.029) | 0.004 | 3.60E-11  | 43.845   |
| rs17094148  | G | A | (0.030) | 0.002 | 2.60E-36  | 158.320  |
| rs17135209  | T | C | (0.015) | 0.003 | 2.30E-08  | 31.220   |
| rs17138744  | T | G | (0.037) | 0.003 | 2.30E-45  | 199.781  |
| rs17175830  | A | G | 0.037   | 0.003 | 3.10E-48  | 212.958  |
| rs1719271   | G | A | 0.032   | 0.003 | 7.80E-25  | 105.885  |
| rs1720607   | A | T | 0.016   | 0.002 | 2.70E-12  | 48.879   |
| rs17302005  | G | A | 0.020   | 0.003 | 7.80E-13  | 51.344   |
| rs174574    | C | A | (0.020) | 0.002 | 3.20E-20  | 84.840   |
| rs17464824  | C | A | 0.014   | 0.002 | 1.70E-10  | 40.763   |
| rs17572109  | A | G | 0.023   | 0.003 | 4.50E-20  | 84.208   |
| rs17604937  | G | T | (0.015) | 0.003 | 2.60E-08  | 31.003   |
| rs17689024  | C | G | 0.028   | 0.002 | 5.50E-34  | 147.706  |
| rs17758695  | T | C | (0.121) | 0.006 | 1.50E-82  | 370.464  |
| rs178010    | T | A | 0.019   | 0.002 | 5.80E-15  | 60.957   |
| rs17828045  | G | T | 0.012   | 0.002 | 2.60E-08  | 30.952   |
| rs1783596   | T | C | 0.019   | 0.002 | 2.10E-18  | 76.595   |
| rs17843793  | A | C | (0.029) | 0.002 | 5.00E-33  | 143.308  |
| rs1790133   | G | T | 0.030   | 0.003 | 9.40E-32  | 137.488  |
| rs1797076   | G | A | (0.017) | 0.002 | 6.90E-15  | 60.625   |
| rs1800692   | G | A | (0.027) | 0.002 | 5.30E-36  | 156.931  |
| rs1820578   | G | A | (0.015) | 0.003 | 5.20E-09  | 34.130   |
| rs1836234   | G | T | 0.013   | 0.002 | 9.40E-09  | 32.958   |
| rs183811190 | T | A | (0.045) | 0.006 | 2.00E-15  | 63.053   |
| rs184221031 | C | T | (0.031) | 0.003 | 7.80E-29  | 124.163  |
| rs191549504 | C | T | (0.098) | 0.008 | 1.60E-31  | 136.449  |
| rs1924930   | A | T | (0.017) | 0.003 | 5.50E-11  | 42.975   |
| rs1938485   | G | A | (0.022) | 0.002 | 1.40E-23  | 100.152  |
| rs1965029   | G | A | (0.015) | 0.003 | 6.80E-09  | 33.583   |
| rs1967822   | G | A | (0.091) | 0.003 | 1.00E-200 | 1276.403 |
| rs1976046   | G | A | (0.013) | 0.002 | 2.40E-09  | 35.603   |
| rs1985109   | T | G | (0.035) | 0.003 | 2.10E-37  | 163.305  |
| rs201010256 | C | A | (0.025) | 0.004 | 1.40E-12  | 50.176   |
| rs202534    | G | A | 0.017   | 0.002 | 3.80E-16  | 66.337   |
| rs2038700   | C | T | 0.019   | 0.002 | 2.80E-18  | 76.021   |
| rs2064723   | A | T | (0.018) | 0.003 | 1.30E-09  | 36.828   |
| rs2077218   | A | G | 0.022   | 0.003 | 1.60E-18  | 77.109   |
| rs2084312   | T | C | 0.025   | 0.003 | 1.50E-21  | 90.858   |
| rs2089979   | G | A | (0.031) | 0.002 | 7.00E-48  | 211.344  |

|            |   |   |         |       |          |         |
|------------|---|---|---------|-------|----------|---------|
| rs2109960  | G | A | (0.017) | 0.003 | 5.00E-09 | 34.205  |
| rs2117205  | A | G | (0.021) | 0.002 | 2.90E-22 | 94.149  |
| rs214054   | G | A | (0.027) | 0.002 | 7.20E-37 | 160.886 |
| rs2152240  | G | T | 0.013   | 0.002 | 5.80E-10 | 38.380  |
| rs2174954  | A | G | 0.014   | 0.002 | 3.40E-11 | 43.927  |
| rs218265   | C | T | 0.025   | 0.003 | 6.80E-17 | 69.718  |
| rs2229357  | A | G | (0.019) | 0.002 | 2.90E-14 | 57.785  |
| rs224082   | T | C | (0.019) | 0.002 | 3.20E-18 | 75.745  |
| rs2243103  | G | C | 0.056   | 0.004 | 8.60E-44 | 192.606 |
| rs2249250  | T | G | (0.015) | 0.002 | 2.60E-11 | 44.485  |
| rs2273215  | A | G | (0.018) | 0.002 | 1.20E-16 | 68.563  |
| rs2283228  | C | A | 0.026   | 0.004 | 2.60E-10 | 39.969  |
| rs2290395  | G | T | (0.026) | 0.004 | 3.10E-12 | 48.632  |
| rs2312304  | T | C | (0.018) | 0.002 | 1.50E-15 | 63.628  |
| rs231353   | G | A | (0.024) | 0.002 | 3.70E-27 | 116.494 |
| rs2321536  | T | C | 0.018   | 0.002 | 8.70E-16 | 64.715  |
| rs2353701  | C | T | 0.015   | 0.002 | 3.00E-12 | 48.665  |
| rs2403070  | C | T | 0.035   | 0.002 | 2.90E-51 | 226.854 |
| rs2407778  | C | T | 0.012   | 0.002 | 1.30E-08 | 32.382  |
| rs2417966  | G | C | 0.017   | 0.002 | 4.70E-12 | 47.812  |
| rs2431726  | A | G | (0.028) | 0.005 | 7.30E-09 | 33.455  |
| rs2438150  | T | C | 0.024   | 0.002 | 1.70E-28 | 122.634 |
| rs247826   | T | C | 0.019   | 0.003 | 7.50E-14 | 55.930  |
| rs2489151  | A | G | (0.017) | 0.002 | 2.00E-13 | 53.982  |
| rs2503704  | C | T | (0.018) | 0.002 | 3.20E-16 | 66.661  |
| rs2546965  | C | G | (0.024) | 0.002 | 3.30E-26 | 112.143 |
| rs26056    | C | A | 0.014   | 0.002 | 1.20E-10 | 41.482  |
| rs2613522  | G | A | (0.022) | 0.002 | 1.50E-19 | 81.745  |
| rs2694653  | C | T | 0.013   | 0.002 | 9.00E-09 | 33.056  |
| rs2700936  | G | T | 0.016   | 0.002 | 1.90E-14 | 58.664  |
| rs273508   | G | A | (0.012) | 0.002 | 1.80E-08 | 31.660  |
| rs2823025  | G | A | 0.028   | 0.004 | 4.60E-14 | 56.900  |
| rs2834319  | C | T | 0.024   | 0.003 | 1.80E-16 | 67.800  |
| rs2836427  | A | G | 0.051   | 0.003 | 2.00E-59 | 264.286 |
| rs28490018 | T | C | (0.021) | 0.003 | 1.20E-11 | 45.950  |
| rs28505677 | G | C | (0.040) | 0.003 | 5.80E-56 | 248.387 |
| rs28526780 | C | T | (0.015) | 0.002 | 7.00E-12 | 47.031  |
| rs28622913 | A | G | (0.022) | 0.002 | 5.10E-23 | 97.592  |
| rs28760466 | G | A | 0.013   | 0.002 | 7.00E-10 | 38.011  |
| rs28833829 | C | G | (0.017) | 0.002 | 1.50E-11 | 45.497  |
| rs28904873 | G | A | (0.021) | 0.003 | 5.60E-10 | 38.463  |
| rs2915607  | C | T | 0.031   | 0.002 | 6.80E-37 | 160.998 |
| rs2999157  | A | G | (0.021) | 0.002 | 1.60E-23 | 99.845  |
| rs3016775  | G | A | (0.018) | 0.002 | 8.80E-13 | 51.088  |
| rs303968   | C | T | (0.023) | 0.002 | 2.10E-26 | 113.044 |
| rs310233   | G | A | (0.016) | 0.003 | 5.50E-10 | 38.485  |
| rs3134617  | C | A | 0.017   | 0.002 | 6.80E-12 | 47.080  |
| rs34544325 | G | A | 0.020   | 0.002 | 4.80E-21 | 88.594  |
| rs34654942 | A | T | (0.018) | 0.003 | 1.30E-12 | 50.350  |
| rs34866937 | A | G | 0.019   | 0.002 | 2.50E-17 | 71.728  |

|             |   |   |         |       |           |          |
|-------------|---|---|---------|-------|-----------|----------|
| rs35069969  | C | G | 0.014   | 0.002 | 1.60E-10  | 40.885   |
| rs35150201  | G | T | (0.030) | 0.002 | 1.50E-44  | 196.088  |
| rs35176054  | A | T | 0.019   | 0.003 | 4.50E-09  | 34.414   |
| rs35355140  | A | C | (0.032) | 0.004 | 3.50E-14  | 57.419   |
| rs35399547  | C | A | (0.025) | 0.003 | 1.30E-16  | 68.486   |
| rs35981402  | T | C | 0.052   | 0.006 | 6.40E-16  | 65.307   |
| rs360142    | A | G | (0.020) | 0.004 | 9.10E-09  | 33.026   |
| rs3731211   | A | T | 0.051   | 0.002 | 1.20E-103 | 467.405  |
| rs3738487   | T | C | 0.022   | 0.002 | 1.40E-25  | 109.239  |
| rs374039502 | A | T | (0.068) | 0.008 | 9.80E-18  | 73.547   |
| rs3743896   | T | C | 0.041   | 0.004 | 5.20E-25  | 106.686  |
| rs375314312 | T | G | (0.014) | 0.002 | 1.10E-10  | 41.677   |
| rs3759217   | T | C | (0.026) | 0.003 | 8.10E-16  | 64.835   |
| rs3786877   | C | T | 0.016   | 0.002 | 2.00E-14  | 58.488   |
| rs3795503   | T | C | (0.014) | 0.002 | 2.10E-10  | 40.344   |
| rs3804749   | T | C | (0.019) | 0.002 | 3.50E-18  | 75.562   |
| rs3807135   | C | T | (0.017) | 0.002 | 5.80E-15  | 60.975   |
| rs3808937   | T | C | 0.024   | 0.003 | 1.50E-19  | 81.803   |
| rs3809272   | A | G | (0.097) | 0.002 | 1.00E-200 | 1770.168 |
| rs381500    | A | C | 0.040   | 0.002 | 2.00E-80  | 360.656  |
| rs3816257   | C | A | (0.017) | 0.002 | 1.10E-15  | 64.208   |
| rs3827554   | C | A | 0.013   | 0.002 | 7.50E-09  | 33.391   |
| rs3912392   | A | G | (0.015) | 0.002 | 1.20E-12  | 50.468   |
| rs3956381   | A | C | 0.017   | 0.002 | 3.70E-15  | 61.871   |
| rs4003412   | G | A | 0.027   | 0.002 | 1.90E-36  | 158.963  |
| rs404876    | G | A | 0.063   | 0.003 | 4.60E-134 | 607.165  |
| rs4121508   | A | G | 0.016   | 0.002 | 5.50E-12  | 47.497   |
| rs41297163  | G | A | 0.022   | 0.003 | 2.50E-10  | 40.061   |
| rs4147915   | A | C | (0.022) | 0.003 | 1.30E-12  | 50.373   |
| rs4148445   | T | C | 0.076   | 0.004 | 9.90E-88  | 394.227  |
| rs415064    | C | G | (0.170) | 0.005 | 1.00E-200 | 1169.474 |
| rs42039     | T | C | (0.016) | 0.002 | 8.70E-11  | 42.098   |
| rs4284303   | C | T | (0.026) | 0.002 | 1.20E-27  | 118.716  |
| rs4286082   | T | C | (0.015) | 0.002 | 3.10E-10  | 39.586   |
| rs4296389   | T | C | 0.014   | 0.002 | 4.40E-09  | 34.446   |
| rs4377525   | C | A | (0.022) | 0.002 | 8.10E-19  | 78.468   |
| rs4388979   | T | G | (0.052) | 0.002 | 2.60E-127 | 576.112  |
| rs4441076   | T | C | (0.012) | 0.002 | 8.40E-09  | 33.173   |
| rs4506581   | G | A | 0.013   | 0.002 | 7.50E-09  | 33.413   |
| rs4520576   | A | G | 0.014   | 0.002 | 5.60E-11  | 42.959   |
| rs4535826   | G | A | 0.016   | 0.003 | 9.30E-10  | 37.462   |
| rs458699    | A | T | 0.022   | 0.002 | 3.50E-19  | 80.150   |
| rs4588      | T | G | (0.016) | 0.002 | 4.50E-12  | 47.913   |
| rs458857    | A | C | 0.013   | 0.002 | 1.80E-09  | 36.192   |
| rs4602501   | C | A | (0.014) | 0.003 | 2.10E-08  | 31.355   |
| rs4630833   | C | T | (0.080) | 0.002 | 1.00E-200 | 1094.480 |
| rs465983    | G | A | 0.014   | 0.002 | 6.30E-09  | 33.747   |
| rs4669879   | C | A | 0.021   | 0.002 | 1.40E-22  | 95.587   |
| rs4672564   | C | A | (0.012) | 0.002 | 2.50E-08  | 31.096   |
| rs4683724   | G | A | (0.013) | 0.002 | 1.40E-09  | 36.630   |

|             |   |   |         |       |           |         |
|-------------|---|---|---------|-------|-----------|---------|
| rs4686388   | A | G | (0.016) | 0.002 | 2.80E-13  | 53.333  |
| rs4704826   | A | C | (0.018) | 0.002 | 4.70E-17  | 70.443  |
| rs4715332   | A | C | (0.026) | 0.002 | 4.80E-33  | 143.421 |
| rs4727976   | G | A | 0.063   | 0.004 | 2.30E-58  | 259.396 |
| rs4731601   | G | A | (0.023) | 0.004 | 8.00E-09  | 33.285  |
| rs4782451   | C | A | (0.014) | 0.002 | 1.10E-11  | 46.066  |
| rs4783994   | A | G | (0.016) | 0.002 | 7.50E-12  | 46.900  |
| rs4806469   | A | G | (0.026) | 0.003 | 3.60E-21  | 89.184  |
| rs4846082   | T | C | (0.048) | 0.002 | 3.40E-113 | 511.220 |
| rs4846914   | A | G | 0.023   | 0.002 | 4.30E-26  | 111.638 |
| rs4902750   | A | G | (0.020) | 0.003 | 8.30E-12  | 46.684  |
| rs4910442   | C | T | (0.022) | 0.002 | 1.90E-25  | 108.692 |
| rs4913405   | A | G | 0.022   | 0.002 | 2.30E-18  | 76.450  |
| rs4915153   | C | T | 0.018   | 0.003 | 1.40E-09  | 36.702  |
| rs4924839   | G | A | 0.014   | 0.002 | 2.90E-10  | 39.772  |
| rs4930028   | C | A | (0.014) | 0.002 | 1.20E-09  | 36.901  |
| rs4936043   | C | G | (0.021) | 0.002 | 1.10E-21  | 91.570  |
| rs4947490   | G | A | 0.021   | 0.002 | 1.20E-19  | 82.217  |
| rs4961348   | T | C | (0.024) | 0.002 | 6.70E-25  | 106.186 |
| rs4965426   | A | G | (0.038) | 0.003 | 1.90E-36  | 158.956 |
| rs4973769   | C | T | (0.023) | 0.002 | 2.00E-22  | 94.897  |
| rs4978874   | C | T | (0.014) | 0.002 | 5.30E-11  | 43.064  |
| rs5130      | T | C | 0.026   | 0.003 | 5.30E-17  | 70.226  |
| rs525092    | G | T | (0.016) | 0.002 | 6.80E-13  | 51.596  |
| rs544400026 | A | G | (0.083) | 0.010 | 5.00E-16  | 65.811  |
| rs55657233  | T | A | 0.015   | 0.003 | 6.00E-09  | 33.842  |
| rs55664157  | A | T | (0.038) | 0.003 | 2.90E-31  | 135.248 |
| rs55708816  | A | G | 0.035   | 0.003 | 3.00E-23  | 98.679  |
| rs55794721  | A | G | (0.044) | 0.002 | 5.00E-92  | 413.988 |
| rs55879786  | A | G | (0.018) | 0.003 | 6.80E-11  | 42.565  |
| rs55881168  | G | T | (0.024) | 0.003 | 2.90E-20  | 85.023  |
| rs55921103  | T | G | (0.017) | 0.002 | 1.20E-14  | 59.547  |
| rs559355    | T | A | (0.017) | 0.003 | 7.30E-09  | 33.456  |
| rs55966801  | C | T | 0.042   | 0.003 | 4.40E-61  | 271.872 |
| rs56043070  | A | G | (0.092) | 0.004 | 3.80E-111 | 501.845 |
| rs56204645  | C | T | (0.016) | 0.003 | 2.40E-10  | 40.097  |
| rs56373295  | A | C | (0.037) | 0.002 | 7.20E-52  | 229.623 |
| rs568971993 | A | G | (0.036) | 0.005 | 4.50E-12  | 47.905  |
| rs56912706  | G | A | 0.014   | 0.002 | 1.60E-10  | 40.850  |
| rs57088429  | A | G | 0.078   | 0.003 | 1.00E-200 | 914.284 |
| rs57201028  | T | C | (0.073) | 0.004 | 5.30E-74  | 331.188 |
| rs5745576   | G | C | 0.082   | 0.007 | 1.60E-31  | 136.426 |
| rs5745687   | T | C | 0.025   | 0.004 | 8.40E-09  | 33.174  |
| rs5763079   | C | A | (0.020) | 0.002 | 1.90E-21  | 90.400  |
| rs58434384  | G | A | 0.068   | 0.004 | 3.30E-71  | 318.345 |
| rs59934550  | C | T | (0.013) | 0.002 | 2.40E-09  | 35.629  |
| rs6005843   | C | T | 0.030   | 0.005 | 2.70E-09  | 35.387  |
| rs60232238  | C | G | (0.018) | 0.003 | 4.20E-13  | 52.570  |
| rs60246644  | T | A | 0.048   | 0.006 | 6.20E-14  | 56.302  |
| rs6044052   | G | T | 0.016   | 0.002 | 2.20E-12  | 49.342  |

|            |   |   |         |       |           |         |
|------------|---|---|---------|-------|-----------|---------|
| rs6060976  | A | G | (0.040) | 0.002 | 6.00E-65  | 289.621 |
| rs6066390  | T | C | 0.014   | 0.003 | 1.30E-08  | 32.304  |
| rs6103669  | A | G | (0.017) | 0.002 | 2.30E-12  | 49.181  |
| rs6142109  | G | A | (0.013) | 0.002 | 4.50E-08  | 29.912  |
| rs61596100 | A | G | (0.019) | 0.002 | 1.40E-17  | 72.781  |
| rs61709988 | C | T | (0.022) | 0.002 | 1.80E-22  | 95.085  |
| rs61750929 | T | C | (0.095) | 0.005 | 1.30E-93  | 421.233 |
| rs61897432 | G | A | 0.037   | 0.003 | 3.20E-35  | 153.336 |
| rs61986597 | C | T | (0.017) | 0.002 | 9.00E-14  | 55.567  |
| rs62002318 | G | A | 0.014   | 0.002 | 7.80E-11  | 42.305  |
| rs62160676 | C | T | 0.033   | 0.002 | 2.00E-45  | 200.130 |
| rs62217799 | T | G | 0.021   | 0.002 | 5.20E-21  | 88.469  |
| rs62340877 | A | G | (0.023) | 0.003 | 1.30E-17  | 73.066  |
| rs62491369 | T | G | (0.025) | 0.003 | 1.10E-16  | 68.739  |
| rs62503282 | T | C | (0.025) | 0.003 | 3.70E-16  | 66.383  |
| rs6469890  | T | C | 0.014   | 0.002 | 5.70E-11  | 42.930  |
| rs6533483  | A | G | (0.030) | 0.002 | 2.60E-43  | 190.404 |
| rs6546096  | G | A | 0.015   | 0.002 | 2.10E-10  | 40.373  |
| rs6546909  | T | A | 0.022   | 0.003 | 1.60E-13  | 54.487  |
| rs655029   | A | G | 0.033   | 0.002 | 1.50E-45  | 200.622 |
| rs6585256  | C | A | (0.015) | 0.002 | 2.80E-10  | 39.834  |
| rs6591177  | A | T | 0.022   | 0.003 | 1.00E-15  | 64.351  |
| rs6592965  | A | G | 0.022   | 0.002 | 2.90E-24  | 103.282 |
| rs6593513  | C | T | (0.016) | 0.002 | 7.80E-13  | 51.327  |
| rs661403   | G | A | (0.023) | 0.002 | 2.20E-24  | 103.831 |
| rs6664992  | G | A | 0.013   | 0.002 | 2.00E-09  | 36.021  |
| rs6685530  | T | C | (0.014) | 0.002 | 5.80E-09  | 33.898  |
| rs669556   | T | C | 0.015   | 0.003 | 4.90E-08  | 29.774  |
| rs6696074  | T | C | 0.018   | 0.002 | 5.30E-17  | 70.204  |
| rs6699095  | C | T | 0.014   | 0.002 | 5.00E-11  | 43.161  |
| rs6706095  | G | T | 0.021   | 0.002 | 1.10E-16  | 68.795  |
| rs67224956 | C | T | 0.018   | 0.003 | 1.30E-10  | 41.357  |
| rs6734238  | G | A | 0.014   | 0.002 | 2.90E-11  | 44.229  |
| rs6742904  | G | T | 0.016   | 0.002 | 1.10E-12  | 50.632  |
| rs6786088  | C | T | (0.025) | 0.002 | 7.90E-28  | 119.551 |
| rs68116612 | A | G | 0.032   | 0.003 | 1.30E-33  | 145.977 |
| rs6815294  | A | G | 0.030   | 0.002 | 6.20E-45  | 197.822 |
| rs6845648  | T | C | 0.024   | 0.002 | 2.20E-29  | 126.656 |
| rs6862111  | C | G | (0.018) | 0.002 | 2.30E-14  | 58.231  |
| rs6883116  | C | T | (0.014) | 0.002 | 6.50E-11  | 42.678  |
| rs6883827  | G | A | 0.037   | 0.002 | 1.30E-64  | 288.122 |
| rs6993770  | T | A | (0.056) | 0.002 | 7.69E-125 | 564.775 |
| rs6997505  | A | C | (0.017) | 0.003 | 1.40E-08  | 32.133  |
| rs7040705  | A | G | (0.014) | 0.002 | 1.30E-10  | 41.253  |
| rs706819   | C | T | 0.022   | 0.002 | 1.20E-19  | 82.253  |
| rs7080386  | A | C | 0.020   | 0.002 | 2.00E-20  | 85.768  |
| rs7104210  | G | T | 0.066   | 0.002 | 1.60E-170 | 774.843 |
| rs7146395  | C | A | (0.015) | 0.002 | 6.60E-11  | 42.634  |
| rs715      | C | T | (0.017) | 0.002 | 7.10E-14  | 56.044  |
| rs7204146  | G | A | 0.024   | 0.003 | 3.90E-17  | 70.837  |

|            |   |   |         |       |           |         |
|------------|---|---|---------|-------|-----------|---------|
| rs7213347  | C | G | (0.042) | 0.002 | 3.40E-75  | 336.677 |
| rs7244202  | C | T | (0.032) | 0.002 | 1.00E-49  | 219.747 |
| rs7252328  | G | A | 0.019   | 0.003 | 4.50E-10  | 38.899  |
| rs72806507 | A | G | (0.022) | 0.004 | 9.40E-09  | 32.960  |
| rs72917226 | A | G | 0.027   | 0.004 | 4.60E-10  | 38.857  |
| rs72952310 | T | G | (0.062) | 0.006 | 1.80E-24  | 104.286 |
| rs73167967 | G | T | 0.066   | 0.004 | 2.90E-58  | 258.954 |
| rs73168819 | A | G | 0.016   | 0.002 | 1.10E-13  | 55.259  |
| rs73202036 | G | A | (0.015) | 0.003 | 5.80E-09  | 33.892  |
| rs73307474 | G | T | 0.029   | 0.004 | 4.00E-12  | 48.131  |
| rs73884852 | G | A | (0.025) | 0.004 | 2.80E-09  | 35.351  |
| rs73928486 | A | G | 0.027   | 0.003 | 4.90E-24  | 102.230 |
| rs7413585  | C | T | (0.018) | 0.002 | 3.90E-17  | 70.826  |
| rs74528993 | A | G | 0.024   | 0.004 | 4.00E-08  | 30.147  |
| rs7500731  | A | G | (0.012) | 0.002 | 3.50E-08  | 30.385  |
| rs75107793 | A | G | 0.115   | 0.004 | 1.00E-170 | 775.708 |
| rs75139539 | T | C | 0.052   | 0.006 | 1.20E-18  | 77.765  |
| rs7516366  | C | T | 0.015   | 0.002 | 6.70E-11  | 42.606  |
| rs754388   | C | G | 0.029   | 0.003 | 4.60E-26  | 111.479 |
| rs75612655 | T | C | 0.143   | 0.012 | 3.30E-34  | 148.735 |
| rs7634359  | C | T | (0.015) | 0.002 | 3.70E-12  | 48.273  |
| rs7655560  | A | G | (0.038) | 0.005 | 5.10E-15  | 61.210  |
| rs7671752  | T | C | (0.013) | 0.002 | 1.30E-09  | 36.769  |
| rs76840964 | G | A | (0.033) | 0.003 | 4.70E-24  | 102.341 |
| rs7686818  | G | A | 0.016   | 0.003 | 7.70E-09  | 33.344  |
| rs7705526  | A | C | 0.059   | 0.002 | 3.60E-148 | 672.051 |
| rs7730720  | G | T | 0.014   | 0.002 | 2.00E-11  | 44.988  |
| rs77338166 | G | A | (0.025) | 0.004 | 1.00E-08  | 32.839  |
| rs77427278 | C | T | 0.055   | 0.008 | 8.50E-11  | 42.148  |
| rs7765042  | T | C | 0.014   | 0.002 | 3.90E-10  | 39.169  |
| rs7779873  | A | G | 0.015   | 0.002 | 9.30E-12  | 46.470  |
| rs7789916  | A | G | (0.017) | 0.002 | 8.40E-14  | 55.716  |
| rs77962418 | A | C | 0.142   | 0.007 | 9.50E-88  | 394.327 |
| rs7803075  | G | A | (0.033) | 0.002 | 2.60E-41  | 181.271 |
| rs78261031 | A | G | (0.029) | 0.004 | 9.50E-11  | 41.922  |
| rs7833924  | G | A | 0.031   | 0.002 | 3.00E-47  | 208.431 |
| rs7843131  | T | C | 0.013   | 0.002 | 3.00E-08  | 30.709  |
| rs7855088  | T | C | 0.022   | 0.002 | 6.80E-26  | 110.724 |
| rs78565404 | T | C | 0.150   | 0.005 | 1.00E-200 | 986.490 |
| rs78584627 | T | G | (0.033) | 0.005 | 4.40E-12  | 47.917  |
| rs7865719  | G | A | (0.042) | 0.002 | 2.70E-89  | 401.389 |
| rs78744187 | T | C | (0.037) | 0.004 | 5.50E-22  | 92.882  |
| rs78909033 | A | G | (0.026) | 0.003 | 1.50E-16  | 68.203  |
| rs79010100 | C | T | 0.056   | 0.003 | 1.30E-70  | 315.685 |
| rs79287178 | A | G | 0.062   | 0.006 | 3.30E-22  | 93.906  |
| rs79716074 | G | A | 0.014   | 0.002 | 2.00E-10  | 40.447  |
| rs79755767 | A | G | 0.068   | 0.004 | 1.70E-82  | 370.145 |
| rs7989654  | A | G | 0.016   | 0.002 | 1.20E-12  | 50.447  |
| rs8012145  | T | C | 0.013   | 0.002 | 4.10E-08  | 30.118  |
| rs8037902  | T | C | (0.016) | 0.002 | 8.50E-13  | 51.165  |

|            |   |   |         |       |           |         |
|------------|---|---|---------|-------|-----------|---------|
| rs804327   | C | T | 0.012   | 0.002 | 4.60E-08  | 29.872  |
| rs8052629  | G | A | (0.017) | 0.002 | 8.40E-16  | 64.779  |
| rs8065615  | C | T | (0.021) | 0.002 | 3.10E-19  | 80.378  |
| rs8066620  | T | C | (0.018) | 0.002 | 1.40E-15  | 63.825  |
| rs8069999  | A | G | (0.022) | 0.003 | 7.10E-17  | 69.635  |
| rs8072157  | A | T | (0.017) | 0.003 | 9.10E-11  | 42.009  |
| rs8093990  | C | A | 0.020   | 0.002 | 2.90E-20  | 85.052  |
| rs8098454  | T | C | 0.027   | 0.004 | 7.20E-13  | 51.498  |
| rs8107139  | C | T | (0.021) | 0.002 | 5.60E-21  | 88.305  |
| rs8176746  | T | G | (0.050) | 0.004 | 3.20E-30  | 130.481 |
| rs8178824  | T | C | 0.122   | 0.006 | 2.80E-85  | 382.943 |
| rs833058   | T | C | 0.016   | 0.002 | 1.00E-12  | 50.826  |
| rs855791   | G | A | (0.027) | 0.002 | 5.30E-37  | 161.493 |
| rs865483   | C | A | (0.022) | 0.002 | 1.30E-22  | 95.690  |
| rs873093   | C | T | 0.020   | 0.002 | 2.10E-19  | 81.142  |
| rs901481   | G | T | 0.014   | 0.002 | 2.50E-10  | 40.016  |
| rs928391   | C | T | (0.024) | 0.002 | 8.90E-24  | 101.067 |
| rs9384844  | T | C | (0.012) | 0.002 | 6.00E-09  | 33.820  |
| rs9386793  | A | C | 0.021   | 0.002 | 3.30E-23  | 98.446  |
| rs9394220  | G | T | 0.017   | 0.003 | 9.20E-11  | 41.976  |
| rs9399141  | C | T | (0.066) | 0.002 | 8.49E-157 | 711.718 |
| rs941407   | G | A | 0.018   | 0.002 | 1.00E-14  | 59.814  |
| rs9429767  | A | G | 0.020   | 0.003 | 4.10E-14  | 57.111  |
| rs947001   | G | A | (0.017) | 0.002 | 2.70E-13  | 53.425  |
| rs9472113  | C | A | (0.015) | 0.002 | 1.80E-09  | 36.212  |
| rs9555695  | T | C | (0.019) | 0.002 | 2.80E-18  | 76.020  |
| rs9635249  | G | A | 0.034   | 0.003 | 2.20E-39  | 172.384 |
| rs9636888  | T | C | 0.023   | 0.002 | 8.40E-24  | 101.190 |
| rs9661787  | G | C | 0.017   | 0.003 | 5.60E-10  | 38.440  |
| rs9730749  | G | A | 0.016   | 0.002 | 5.00E-11  | 43.185  |
| rs9793310  | C | T | 0.018   | 0.002 | 2.40E-17  | 71.801  |
| rs9809116  | G | A | 0.017   | 0.002 | 1.20E-14  | 59.615  |
| rs9904395  | G | A | (0.087) | 0.005 | 3.70E-57  | 253.885 |
| rs9926463  | C | A | (0.021) | 0.002 | 1.90E-18  | 76.785  |
| rs9983374  | T | C | 0.022   | 0.002 | 1.10E-19  | 82.397  |
| rs1002707  | T | C | (0.028) | 0.002 | 4.20E-30  | 129.947 |
| rs10048745 | A | G | 0.032   | 0.002 | 3.20E-39  | 171.689 |
| rs10064543 | A | G | 0.018   | 0.002 | 2.60E-15  | 62.553  |
| rs10112386 | C | T | (0.016) | 0.003 | 9.90E-09  | 32.859  |
| rs10174    | G | A | (0.018) | 0.002 | 1.40E-16  | 68.319  |
| rs10180658 | T | C | 0.024   | 0.002 | 2.10E-28  | 122.161 |
| rs10188795 | T | G | 0.028   | 0.005 | 4.20E-09  | 34.542  |
| rs10240931 | C | G | (0.029) | 0.003 | 5.40E-18  | 74.747  |
| rs1033686  | A | G | (0.038) | 0.003 | 1.30E-37  | 164.353 |
| rs1034491  | A | G | (0.020) | 0.003 | 5.80E-14  | 56.423  |
| rs1034564  | T | C | 0.025   | 0.002 | 5.90E-27  | 115.565 |
| rs10400322 | T | C | (0.013) | 0.002 | 2.80E-09  | 35.326  |
| rs10447226 | T | G | (0.016) | 0.002 | 5.20E-12  | 47.618  |
| rs10456113 | G | T | 0.027   | 0.003 | 6.00E-18  | 74.508  |
| rs1048155  | G | C | (0.013) | 0.002 | 4.50E-09  | 34.389  |

|             |   |   |         |       |           |          |
|-------------|---|---|---------|-------|-----------|----------|
| rs10505545  | T | C | 0.018   | 0.002 | 7.30E-17  | 69.578   |
| rs10510412  | A | G | 0.022   | 0.002 | 1.10E-18  | 77.946   |
| rs10512472  | C | T | 0.042   | 0.003 | 1.10E-50  | 224.169  |
| rs1074958   | T | C | (0.029) | 0.004 | 1.50E-15  | 63.606   |
| rs1079227   | G | C | (0.027) | 0.002 | 8.30E-28  | 119.461  |
| rs10818963  | A | T | (0.021) | 0.002 | 5.90E-21  | 88.201   |
| rs10849819  | T | C | (0.019) | 0.002 | 1.30E-17  | 72.986   |
| rs10864368  | C | T | 0.034   | 0.002 | 6.60E-58  | 257.303  |
| rs10875730  | T | A | 0.018   | 0.003 | 1.60E-12  | 49.901   |
| rs10882179  | T | C | (0.013) | 0.002 | 5.40E-10  | 38.545   |
| rs10888263  | G | T | (0.014) | 0.002 | 4.10E-11  | 43.569   |
| rs10893871  | C | T | (0.026) | 0.002 | 2.50E-30  | 130.978  |
| rs10940072  | A | G | (0.015) | 0.002 | 1.40E-11  | 45.615   |
| rs10940474  | T | C | (0.015) | 0.002 | 6.90E-12  | 47.049   |
| rs10974874  | T | A | 0.032   | 0.003 | 1.90E-30  | 131.513  |
| rs10992746  | C | T | (0.013) | 0.002 | 6.60E-09  | 33.662   |
| rs1105314   | G | A | 0.015   | 0.002 | 1.90E-11  | 45.026   |
| rs11064156  | C | T | (0.018) | 0.002 | 3.30E-17  | 71.130   |
| rs11076515  | A | G | 0.018   | 0.002 | 1.80E-13  | 54.170   |
| rs11082304  | T | G | (0.033) | 0.002 | 3.50E-55  | 244.792  |
| rs11107039  | A | G | 0.024   | 0.003 | 4.80E-17  | 70.419   |
| rs11126249  | G | T | (0.016) | 0.003 | 2.40E-09  | 35.612   |
| rs11168249  | C | T | 0.026   | 0.002 | 4.70E-35  | 152.591  |
| rs111938639 | C | T | 0.017   | 0.003 | 1.20E-08  | 32.432   |
| rs11225024  | T | A | 0.027   | 0.004 | 3.90E-12  | 48.176   |
| rs112326923 | C | T | 0.085   | 0.009 | 4.00E-22  | 93.517   |
| rs11240572  | A | C | 0.037   | 0.006 | 9.50E-09  | 32.939   |
| rs112423577 | T | C | 0.040   | 0.007 | 5.80E-09  | 33.893   |
| rs112969588 | C | T | (0.037) | 0.004 | 2.40E-23  | 99.082   |
| rs113542380 | A | G | (0.070) | 0.004 | 3.00E-67  | 300.201  |
| rs114694170 | C | T | 0.090   | 0.005 | 4.70E-87  | 391.111  |
| rs11504523  | G | A | 0.034   | 0.004 | 5.00E-16  | 65.813   |
| rs115446347 | C | T | 0.080   | 0.004 | 2.00E-70  | 314.717  |
| rs11553699  | G | A | 0.118   | 0.003 | 1.00E-200 | 1273.999 |
| rs115566353 | A | G | (0.065) | 0.011 | 2.90E-09  | 35.233   |
| rs116052829 | T | C | 0.031   | 0.003 | 7.80E-19  | 78.539   |
| rs11615482  | A | C | 0.021   | 0.003 | 1.90E-15  | 63.117   |
| rs11655709  | C | T | 0.028   | 0.003 | 3.80E-16  | 66.346   |
| rs11676298  | G | C | 0.038   | 0.003 | 1.30E-44  | 196.312  |
| rs11679328  | T | C | 0.029   | 0.004 | 3.00E-11  | 44.207   |
| rs11715288  | C | T | 0.027   | 0.002 | 1.80E-36  | 159.036  |
| rs11745324  | A | G | 0.017   | 0.003 | 5.60E-11  | 42.951   |
| rs11757155  | T | C | (0.015) | 0.002 | 5.40E-12  | 47.525   |
| rs117857686 | T | C | 0.118   | 0.008 | 1.30E-55  | 246.836  |
| rs11794772  | A | G | 0.034   | 0.002 | 1.30E-45  | 200.921  |
| rs11818463  | C | G | (0.029) | 0.002 | 2.30E-38  | 167.784  |
| rs11841319  | T | C | (0.059) | 0.004 | 8.20E-64  | 284.425  |
| rs1185670   | T | C | (0.022) | 0.003 | 2.60E-18  | 76.205   |
| rs11876150  | C | T | (0.037) | 0.005 | 9.60E-15  | 59.977   |
| rs12050628  | A | G | 0.015   | 0.002 | 6.70E-10  | 38.116   |

|             |   |   |         |       |           |         |
|-------------|---|---|---------|-------|-----------|---------|
| rs12052715  | G | C | (0.052) | 0.002 | 4.80E-108 | 487.571 |
| rs12155039  | A | C | (0.050) | 0.002 | 2.30E-120 | 544.171 |
| rs12220411  | A | G | 0.016   | 0.003 | 1.90E-09  | 36.055  |
| rs12223381  | T | C | 0.031   | 0.002 | 8.50E-48  | 210.963 |
| rs12223916  | G | C | (0.039) | 0.004 | 5.70E-28  | 120.210 |
| rs12371562  | T | C | 0.028   | 0.005 | 5.10E-09  | 34.137  |
| rs12376511  | C | T | (0.056) | 0.003 | 1.20E-85  | 384.597 |
| rs12448829  | A | G | 0.022   | 0.002 | 1.90E-23  | 99.611  |
| rs12484795  | C | A | (0.024) | 0.003 | 9.70E-17  | 69.028  |
| rs12491937  | G | A | (0.042) | 0.002 | 7.70E-87  | 390.135 |
| rs12523094  | C | T | 0.018   | 0.002 | 9.10E-17  | 69.150  |
| rs12536349  | A | G | 0.027   | 0.004 | 3.60E-10  | 39.304  |
| rs12564806  | T | C | (0.034) | 0.002 | 1.50E-41  | 182.344 |
| rs12565181  | A | G | 0.019   | 0.003 | 2.60E-09  | 35.435  |
| rs12574844  | A | G | (0.026) | 0.004 | 8.70E-10  | 37.594  |
| rs1260326   | C | T | (0.038) | 0.002 | 2.20E-67  | 300.763 |
| rs12635205  | G | A | 0.022   | 0.002 | 3.90E-24  | 102.705 |
| rs12668458  | C | T | (0.012) | 0.002 | 3.40E-08  | 30.473  |
| rs12680058  | T | C | (0.017) | 0.003 | 2.30E-09  | 35.698  |
| rs12712068  | G | A | 0.023   | 0.002 | 3.80E-25  | 107.334 |
| rs12721051  | G | C | (0.034) | 0.003 | 8.30E-37  | 160.605 |
| rs12885460  | C | T | (0.015) | 0.002 | 4.00E-12  | 48.101  |
| rs12889267  | G | A | 0.021   | 0.003 | 4.30E-13  | 52.510  |
| rs12898998  | A | C | 0.012   | 0.002 | 8.30E-09  | 33.204  |
| rs12910114  | T | C | 0.020   | 0.002 | 1.70E-17  | 72.502  |
| rs1297257   | G | A | (0.023) | 0.002 | 5.20E-26  | 111.271 |
| rs12977252  | G | A | 0.024   | 0.004 | 2.30E-10  | 40.170  |
| rs13084317  | A | G | 0.017   | 0.002 | 7.30E-14  | 55.995  |
| rs13118519  | T | C | (0.023) | 0.002 | 3.40E-26  | 112.094 |
| rs13224082  | T | A | (0.023) | 0.002 | 1.30E-20  | 86.715  |
| rs13260832  | G | A | 0.019   | 0.003 | 1.10E-12  | 50.634  |
| rs13274496  | A | G | 0.024   | 0.003 | 1.90E-21  | 90.421  |
| rs1334577   | A | G | (0.021) | 0.002 | 7.70E-17  | 69.496  |
| rs1354034   | C | T | 0.025   | 0.002 | 7.30E-31  | 133.425 |
| rs1364076   | G | A | 0.021   | 0.002 | 1.10E-19  | 82.462  |
| rs138901672 | A | G | (0.054) | 0.006 | 1.40E-18  | 77.381  |
| rs139963228 | A | G | 0.045   | 0.008 | 3.60E-08  | 30.329  |
| rs139974673 | C | T | 0.123   | 0.007 | 3.10E-74  | 332.240 |
| rs140255439 | T | C | 0.056   | 0.010 | 3.00E-08  | 30.681  |
| rs140294987 | A | T | 0.023   | 0.003 | 8.80E-13  | 51.096  |
| rs140436199 | A | G | (0.054) | 0.005 | 4.80E-32  | 138.815 |
| rs140709290 | T | A | 0.030   | 0.005 | 1.10E-09  | 37.135  |
| rs1434282   | T | C | 0.049   | 0.002 | 1.40E-96  | 434.827 |
| rs143705965 | T | C | 0.040   | 0.006 | 7.60E-10  | 37.865  |
| rs144317085 | T | A | 0.057   | 0.006 | 4.80E-22  | 93.178  |
| rs1461102   | C | T | 0.015   | 0.003 | 4.20E-08  | 30.038  |
| rs146207734 | T | A | (0.088) | 0.009 | 3.10E-22  | 94.031  |
| rs146940154 | A | G | (0.067) | 0.008 | 6.80E-19  | 78.836  |
| rs1472265   | C | T | (0.013) | 0.002 | 1.90E-09  | 36.064  |
| rs147412694 | A | G | (0.020) | 0.003 | 1.40E-11  | 45.609  |

|             |   |   |         |       |           |          |
|-------------|---|---|---------|-------|-----------|----------|
| rs150156796 | C | T | 0.039   | 0.006 | 2.00E-11  | 44.988   |
| rs150568286 | A | G | (0.114) | 0.010 | 3.10E-31  | 135.103  |
| rs150665764 | C | G | 0.047   | 0.008 | 1.10E-08  | 32.710   |
| rs150897705 | A | T | 0.029   | 0.005 | 1.30E-09  | 36.806   |
| rs151165225 | T | C | (0.039) | 0.002 | 3.60E-56  | 249.334  |
| rs151234    | C | G | 0.041   | 0.003 | 2.70E-38  | 167.419  |
| rs1539019   | C | A | 0.019   | 0.002 | 6.20E-18  | 74.449   |
| rs1547247   | A | G | 0.080   | 0.002 | 1.00E-200 | 1207.781 |
| rs1555405   | A | G | (0.067) | 0.002 | 2.70E-163 | 741.559  |
| rs1556739   | T | G | 0.017   | 0.003 | 7.20E-09  | 33.480   |
| rs156355    | C | T | 0.044   | 0.002 | 4.80E-91  | 409.443  |
| rs1569419   | C | T | 0.042   | 0.003 | 1.90E-61  | 273.600  |
| rs158638    | A | G | (0.012) | 0.002 | 5.80E-09  | 33.914   |
| rs160697    | G | A | 0.017   | 0.002 | 1.30E-14  | 59.377   |
| rs1642764   | T | C | (0.017) | 0.002 | 8.70E-15  | 60.174   |
| rs165177    | C | T | 0.020   | 0.002 | 2.00E-16  | 67.613   |
| rs16858720  | G | A | 0.046   | 0.003 | 2.10E-45  | 199.984  |
| rs16928078  | T | C | (0.019) | 0.003 | 3.40E-08  | 30.460   |
| rs1702840   | T | C | (0.029) | 0.004 | 3.60E-11  | 43.845   |
| rs17094148  | G | A | (0.030) | 0.002 | 2.60E-36  | 158.320  |
| rs17135209  | T | C | (0.015) | 0.003 | 2.30E-08  | 31.220   |
| rs17138744  | T | G | (0.037) | 0.003 | 2.30E-45  | 199.781  |
| rs17175830  | A | G | 0.037   | 0.003 | 3.10E-48  | 212.958  |
| rs1719271   | G | A | 0.032   | 0.003 | 7.80E-25  | 105.885  |
| rs1720607   | A | T | 0.016   | 0.002 | 2.70E-12  | 48.879   |
| rs17302005  | G | A | 0.020   | 0.003 | 7.80E-13  | 51.344   |
| rs174574    | C | A | (0.020) | 0.002 | 3.20E-20  | 84.840   |
| rs17464824  | C | A | 0.014   | 0.002 | 1.70E-10  | 40.763   |
| rs17572109  | A | G | 0.023   | 0.003 | 4.50E-20  | 84.208   |
| rs17604937  | G | T | (0.015) | 0.003 | 2.60E-08  | 31.003   |
| rs17689024  | C | G | 0.028   | 0.002 | 5.50E-34  | 147.706  |
| rs17758695  | T | C | (0.121) | 0.006 | 1.50E-82  | 370.464  |
| rs178010    | T | A | 0.019   | 0.002 | 5.80E-15  | 60.957   |
| rs17828045  | G | T | 0.012   | 0.002 | 2.60E-08  | 30.952   |
| rs1783596   | T | C | 0.019   | 0.002 | 2.10E-18  | 76.595   |
| rs17843793  | A | C | (0.029) | 0.002 | 5.00E-33  | 143.308  |
| rs1790133   | G | T | 0.030   | 0.003 | 9.40E-32  | 137.488  |
| rs1797076   | G | A | (0.017) | 0.002 | 6.90E-15  | 60.625   |
| rs1800692   | G | A | (0.027) | 0.002 | 5.30E-36  | 156.931  |
| rs1820578   | G | A | (0.015) | 0.003 | 5.20E-09  | 34.130   |
| rs1836234   | G | T | 0.013   | 0.002 | 9.40E-09  | 32.958   |
| rs183811190 | T | A | (0.045) | 0.006 | 2.00E-15  | 63.053   |
| rs184221031 | C | T | (0.031) | 0.003 | 7.80E-29  | 124.163  |
| rs191549504 | C | T | (0.098) | 0.008 | 1.60E-31  | 136.449  |
| rs1924930   | A | T | (0.017) | 0.003 | 5.50E-11  | 42.975   |
| rs1938485   | G | A | (0.022) | 0.002 | 1.40E-23  | 100.152  |
| rs1965029   | G | A | (0.015) | 0.003 | 6.80E-09  | 33.583   |
| rs1967822   | G | A | (0.091) | 0.003 | 1.00E-200 | 1276.403 |
| rs1976046   | G | A | (0.013) | 0.002 | 2.40E-09  | 35.603   |
| rs1985109   | T | G | (0.035) | 0.003 | 2.10E-37  | 163.305  |

|             |   |   |         |       |          |         |
|-------------|---|---|---------|-------|----------|---------|
| rs201010256 | C | A | (0.025) | 0.004 | 1.40E-12 | 50.176  |
| rs202534    | G | A | 0.017   | 0.002 | 3.80E-16 | 66.337  |
| rs2038700   | C | T | 0.019   | 0.002 | 2.80E-18 | 76.021  |
| rs2064723   | A | T | (0.018) | 0.003 | 1.30E-09 | 36.828  |
| rs2077218   | A | G | 0.022   | 0.003 | 1.60E-18 | 77.109  |
| rs2084312   | T | C | 0.025   | 0.003 | 1.50E-21 | 90.858  |
| rs2089979   | G | A | (0.031) | 0.002 | 7.00E-48 | 211.344 |
| rs2109960   | G | A | (0.017) | 0.003 | 5.00E-09 | 34.205  |
| rs2117205   | A | G | (0.021) | 0.002 | 2.90E-22 | 94.149  |
| rs214054    | G | A | (0.027) | 0.002 | 7.20E-37 | 160.886 |
| rs2152240   | G | T | 0.013   | 0.002 | 5.80E-10 | 38.380  |
| rs2174954   | A | G | 0.014   | 0.002 | 3.40E-11 | 43.927  |
| rs218265    | C | T | 0.025   | 0.003 | 6.80E-17 | 69.718  |
| rs2229357   | A | G | (0.019) | 0.002 | 2.90E-14 | 57.785  |
| rs224082    | T | C | (0.019) | 0.002 | 3.20E-18 | 75.745  |
| rs2243103   | G | C | 0.056   | 0.004 | 8.60E-44 | 192.606 |
| rs2249250   | T | G | (0.015) | 0.002 | 2.60E-11 | 44.485  |
| rs2273215   | A | G | (0.018) | 0.002 | 1.20E-16 | 68.563  |
| rs2283228   | C | A | 0.026   | 0.004 | 2.60E-10 | 39.969  |
| rs2290395   | G | T | (0.026) | 0.004 | 3.10E-12 | 48.632  |
| rs2312304   | T | C | (0.018) | 0.002 | 1.50E-15 | 63.628  |
| rs231353    | G | A | (0.024) | 0.002 | 3.70E-27 | 116.494 |
| rs2321536   | T | C | 0.018   | 0.002 | 8.70E-16 | 64.715  |
| rs2353701   | C | T | 0.015   | 0.002 | 3.00E-12 | 48.665  |
| rs2403070   | C | T | 0.035   | 0.002 | 2.90E-51 | 226.854 |
| rs2407778   | C | T | 0.012   | 0.002 | 1.30E-08 | 32.382  |
| rs2417966   | G | C | 0.017   | 0.002 | 4.70E-12 | 47.812  |
| rs2431726   | A | G | (0.028) | 0.005 | 7.30E-09 | 33.455  |
| rs2438150   | T | C | 0.024   | 0.002 | 1.70E-28 | 122.634 |
| rs247826    | T | C | 0.019   | 0.003 | 7.50E-14 | 55.930  |
| rs2489151   | A | G | (0.017) | 0.002 | 2.00E-13 | 53.982  |
| rs2503704   | C | T | (0.018) | 0.002 | 3.20E-16 | 66.661  |
| rs2546965   | C | G | (0.024) | 0.002 | 3.30E-26 | 112.143 |
| rs26056     | C | A | 0.014   | 0.002 | 1.20E-10 | 41.482  |
| rs2613522   | G | A | (0.022) | 0.002 | 1.50E-19 | 81.745  |
| rs2694653   | C | T | 0.013   | 0.002 | 9.00E-09 | 33.056  |
| rs2700936   | G | T | 0.016   | 0.002 | 1.90E-14 | 58.664  |
| rs273508    | G | A | (0.012) | 0.002 | 1.80E-08 | 31.660  |
| rs2823025   | G | A | 0.028   | 0.004 | 4.60E-14 | 56.900  |
| rs2834319   | C | T | 0.024   | 0.003 | 1.80E-16 | 67.800  |
| rs2836427   | A | G | 0.051   | 0.003 | 2.00E-59 | 264.286 |
| rs28490018  | T | C | (0.021) | 0.003 | 1.20E-11 | 45.950  |
| rs28505677  | G | C | (0.040) | 0.003 | 5.80E-56 | 248.387 |
| rs28526780  | C | T | (0.015) | 0.002 | 7.00E-12 | 47.031  |
| rs28622913  | A | G | (0.022) | 0.002 | 5.10E-23 | 97.592  |
| rs28760466  | G | A | 0.013   | 0.002 | 7.00E-10 | 38.011  |
| rs28833829  | C | G | (0.017) | 0.002 | 1.50E-11 | 45.497  |
| rs28904873  | G | A | (0.021) | 0.003 | 5.60E-10 | 38.463  |
| rs2915607   | C | T | 0.031   | 0.002 | 6.80E-37 | 160.998 |
| rs2999157   | A | G | (0.021) | 0.002 | 1.60E-23 | 99.845  |

|             |   |   |         |       |           |          |
|-------------|---|---|---------|-------|-----------|----------|
| rs3016775   | G | A | (0.018) | 0.002 | 8.80E-13  | 51.088   |
| rs303968    | C | T | (0.023) | 0.002 | 2.10E-26  | 113.044  |
| rs310233    | G | A | (0.016) | 0.003 | 5.50E-10  | 38.485   |
| rs3134617   | C | A | 0.017   | 0.002 | 6.80E-12  | 47.080   |
| rs34544325  | G | A | 0.020   | 0.002 | 4.80E-21  | 88.594   |
| rs34654942  | A | T | (0.018) | 0.003 | 1.30E-12  | 50.350   |
| rs34866937  | A | G | 0.019   | 0.002 | 2.50E-17  | 71.728   |
| rs35069969  | C | G | 0.014   | 0.002 | 1.60E-10  | 40.885   |
| rs35150201  | G | T | (0.030) | 0.002 | 1.50E-44  | 196.088  |
| rs35176054  | A | T | 0.019   | 0.003 | 4.50E-09  | 34.414   |
| rs35355140  | A | C | (0.032) | 0.004 | 3.50E-14  | 57.419   |
| rs35399547  | C | A | (0.025) | 0.003 | 1.30E-16  | 68.486   |
| rs35981402  | T | C | 0.052   | 0.006 | 6.40E-16  | 65.307   |
| rs360142    | A | G | (0.020) | 0.004 | 9.10E-09  | 33.026   |
| rs3731211   | A | T | 0.051   | 0.002 | 1.20E-103 | 467.405  |
| rs3738487   | T | C | 0.022   | 0.002 | 1.40E-25  | 109.239  |
| rs374039502 | A | T | (0.068) | 0.008 | 9.80E-18  | 73.547   |
| rs3743896   | T | C | 0.041   | 0.004 | 5.20E-25  | 106.686  |
| rs375314312 | T | G | (0.014) | 0.002 | 1.10E-10  | 41.677   |
| rs3759217   | T | C | (0.026) | 0.003 | 8.10E-16  | 64.835   |
| rs3786877   | C | T | 0.016   | 0.002 | 2.00E-14  | 58.488   |
| rs3795503   | T | C | (0.014) | 0.002 | 2.10E-10  | 40.344   |
| rs3804749   | T | C | (0.019) | 0.002 | 3.50E-18  | 75.562   |
| rs3807135   | C | T | (0.017) | 0.002 | 5.80E-15  | 60.975   |
| rs3808937   | T | C | 0.024   | 0.003 | 1.50E-19  | 81.803   |
| rs3809272   | A | G | (0.097) | 0.002 | 1.00E-200 | 1770.168 |
| rs381500    | A | C | 0.040   | 0.002 | 2.00E-80  | 360.656  |
| rs3816257   | C | A | (0.017) | 0.002 | 1.10E-15  | 64.208   |
| rs3827554   | C | A | 0.013   | 0.002 | 7.50E-09  | 33.391   |
| rs3912392   | A | G | (0.015) | 0.002 | 1.20E-12  | 50.468   |
| rs3956381   | A | C | 0.017   | 0.002 | 3.70E-15  | 61.871   |
| rs4003412   | G | A | 0.027   | 0.002 | 1.90E-36  | 158.963  |
| rs404876    | G | A | 0.063   | 0.003 | 4.60E-134 | 607.165  |
| rs4121508   | A | G | 0.016   | 0.002 | 5.50E-12  | 47.497   |
| rs41297163  | G | A | 0.022   | 0.003 | 2.50E-10  | 40.061   |
| rs4147915   | A | C | (0.022) | 0.003 | 1.30E-12  | 50.373   |
| rs4148445   | T | C | 0.076   | 0.004 | 9.90E-88  | 394.227  |
| rs415064    | C | G | (0.170) | 0.005 | 1.00E-200 | 1169.474 |
| rs42039     | T | C | (0.016) | 0.002 | 8.70E-11  | 42.098   |
| rs4284303   | C | T | (0.026) | 0.002 | 1.20E-27  | 118.716  |
| rs4286082   | T | C | (0.015) | 0.002 | 3.10E-10  | 39.586   |
| rs4296389   | T | C | 0.014   | 0.002 | 4.40E-09  | 34.446   |
| rs4377525   | C | A | (0.022) | 0.002 | 8.10E-19  | 78.468   |
| rs4388979   | T | G | (0.052) | 0.002 | 2.60E-127 | 576.112  |
| rs4441076   | T | C | (0.012) | 0.002 | 8.40E-09  | 33.173   |
| rs4506581   | G | A | 0.013   | 0.002 | 7.50E-09  | 33.413   |
| rs4520576   | A | G | 0.014   | 0.002 | 5.60E-11  | 42.959   |
| rs4535826   | G | A | 0.016   | 0.003 | 9.30E-10  | 37.462   |
| rs458699    | A | T | 0.022   | 0.002 | 3.50E-19  | 80.150   |
| rs4588      | T | G | (0.016) | 0.002 | 4.50E-12  | 47.913   |

|             |   |   |         |       |           |          |
|-------------|---|---|---------|-------|-----------|----------|
| rs458857    | A | C | 0.013   | 0.002 | 1.80E-09  | 36.192   |
| rs4602501   | C | A | (0.014) | 0.003 | 2.10E-08  | 31.355   |
| rs4630833   | C | T | (0.080) | 0.002 | 1.00E-200 | 1094.480 |
| rs465983    | G | A | 0.014   | 0.002 | 6.30E-09  | 33.747   |
| rs4669879   | C | A | 0.021   | 0.002 | 1.40E-22  | 95.587   |
| rs4672564   | C | A | (0.012) | 0.002 | 2.50E-08  | 31.096   |
| rs4683724   | G | A | (0.013) | 0.002 | 1.40E-09  | 36.630   |
| rs4686388   | A | G | (0.016) | 0.002 | 2.80E-13  | 53.333   |
| rs4704826   | A | C | (0.018) | 0.002 | 4.70E-17  | 70.443   |
| rs4715332   | A | C | (0.026) | 0.002 | 4.80E-33  | 143.421  |
| rs4727976   | G | A | 0.063   | 0.004 | 2.30E-58  | 259.396  |
| rs4731601   | G | A | (0.023) | 0.004 | 8.00E-09  | 33.285   |
| rs4782451   | C | A | (0.014) | 0.002 | 1.10E-11  | 46.066   |
| rs4783994   | A | G | (0.016) | 0.002 | 7.50E-12  | 46.900   |
| rs4806469   | A | G | (0.026) | 0.003 | 3.60E-21  | 89.184   |
| rs4846082   | T | C | (0.048) | 0.002 | 3.40E-113 | 511.220  |
| rs4846914   | A | G | 0.023   | 0.002 | 4.30E-26  | 111.638  |
| rs4902750   | A | G | (0.020) | 0.003 | 8.30E-12  | 46.684   |
| rs4910442   | C | T | (0.022) | 0.002 | 1.90E-25  | 108.692  |
| rs4913405   | A | G | 0.022   | 0.002 | 2.30E-18  | 76.450   |
| rs4915153   | C | T | 0.018   | 0.003 | 1.40E-09  | 36.702   |
| rs4924839   | G | A | 0.014   | 0.002 | 2.90E-10  | 39.772   |
| rs4930028   | C | A | (0.014) | 0.002 | 1.20E-09  | 36.901   |
| rs4936043   | C | G | (0.021) | 0.002 | 1.10E-21  | 91.570   |
| rs4947490   | G | A | 0.021   | 0.002 | 1.20E-19  | 82.217   |
| rs4961348   | T | C | (0.024) | 0.002 | 6.70E-25  | 106.186  |
| rs4965426   | A | G | (0.038) | 0.003 | 1.90E-36  | 158.956  |
| rs4973769   | C | T | (0.023) | 0.002 | 2.00E-22  | 94.897   |
| rs4978874   | C | T | (0.014) | 0.002 | 5.30E-11  | 43.064   |
| rs5130      | T | C | 0.026   | 0.003 | 5.30E-17  | 70.226   |
| rs525092    | G | T | (0.016) | 0.002 | 6.80E-13  | 51.596   |
| rs544400026 | A | G | (0.083) | 0.010 | 5.00E-16  | 65.811   |
| rs55657233  | T | A | 0.015   | 0.003 | 6.00E-09  | 33.842   |
| rs55664157  | A | T | (0.038) | 0.003 | 2.90E-31  | 135.248  |
| rs55708816  | A | G | 0.035   | 0.003 | 3.00E-23  | 98.679   |
| rs55794721  | A | G | (0.044) | 0.002 | 5.00E-92  | 413.988  |
| rs55879786  | A | G | (0.018) | 0.003 | 6.80E-11  | 42.565   |
| rs55881168  | G | T | (0.024) | 0.003 | 2.90E-20  | 85.023   |
| rs55921103  | T | G | (0.017) | 0.002 | 1.20E-14  | 59.547   |
| rs559355    | T | A | (0.017) | 0.003 | 7.30E-09  | 33.456   |
| rs55966801  | C | T | 0.042   | 0.003 | 4.40E-61  | 271.872  |
| rs56043070  | A | G | (0.092) | 0.004 | 3.80E-111 | 501.845  |
| rs56204645  | C | T | (0.016) | 0.003 | 2.40E-10  | 40.097   |
| rs56373295  | A | C | (0.037) | 0.002 | 7.20E-52  | 229.623  |
| rs568971993 | A | G | (0.036) | 0.005 | 4.50E-12  | 47.905   |
| rs56912706  | G | A | 0.014   | 0.002 | 1.60E-10  | 40.850   |
| rs57088429  | A | G | 0.078   | 0.003 | 1.00E-200 | 914.284  |
| rs57201028  | T | C | (0.073) | 0.004 | 5.30E-74  | 331.188  |
| rs5745576   | G | C | 0.082   | 0.007 | 1.60E-31  | 136.426  |
| rs5745687   | T | C | 0.025   | 0.004 | 8.40E-09  | 33.174   |

|            |   |   |         |       |           |         |
|------------|---|---|---------|-------|-----------|---------|
| rs5763079  | C | A | (0.020) | 0.002 | 1.90E-21  | 90.400  |
| rs58434384 | G | A | 0.068   | 0.004 | 3.30E-71  | 318.345 |
| rs59934550 | C | T | (0.013) | 0.002 | 2.40E-09  | 35.629  |
| rs6005843  | C | T | 0.030   | 0.005 | 2.70E-09  | 35.387  |
| rs60232238 | C | G | (0.018) | 0.003 | 4.20E-13  | 52.570  |
| rs60246644 | T | A | 0.048   | 0.006 | 6.20E-14  | 56.302  |
| rs6044052  | G | T | 0.016   | 0.002 | 2.20E-12  | 49.342  |
| rs6060976  | A | G | (0.040) | 0.002 | 6.00E-65  | 289.621 |
| rs6066390  | T | C | 0.014   | 0.003 | 1.30E-08  | 32.304  |
| rs6103669  | A | G | (0.017) | 0.002 | 2.30E-12  | 49.181  |
| rs6142109  | G | A | (0.013) | 0.002 | 4.50E-08  | 29.912  |
| rs61596100 | A | G | (0.019) | 0.002 | 1.40E-17  | 72.781  |
| rs61709988 | C | T | (0.022) | 0.002 | 1.80E-22  | 95.085  |
| rs61750929 | T | C | (0.095) | 0.005 | 1.30E-93  | 421.233 |
| rs61897432 | G | A | 0.037   | 0.003 | 3.20E-35  | 153.336 |
| rs61986597 | C | T | (0.017) | 0.002 | 9.00E-14  | 55.567  |
| rs62002318 | G | A | 0.014   | 0.002 | 7.80E-11  | 42.305  |
| rs62160676 | C | T | 0.033   | 0.002 | 2.00E-45  | 200.130 |
| rs62217799 | T | G | 0.021   | 0.002 | 5.20E-21  | 88.469  |
| rs62340877 | A | G | (0.023) | 0.003 | 1.30E-17  | 73.066  |
| rs62491369 | T | G | (0.025) | 0.003 | 1.10E-16  | 68.739  |
| rs62503282 | T | C | (0.025) | 0.003 | 3.70E-16  | 66.383  |
| rs6469890  | T | C | 0.014   | 0.002 | 5.70E-11  | 42.930  |
| rs6533483  | A | G | (0.030) | 0.002 | 2.60E-43  | 190.404 |
| rs6546096  | G | A | 0.015   | 0.002 | 2.10E-10  | 40.373  |
| rs6546909  | T | A | 0.022   | 0.003 | 1.60E-13  | 54.487  |
| rs655029   | A | G | 0.033   | 0.002 | 1.50E-45  | 200.622 |
| rs6585256  | C | A | (0.015) | 0.002 | 2.80E-10  | 39.834  |
| rs6591177  | A | T | 0.022   | 0.003 | 1.00E-15  | 64.351  |
| rs6592965  | A | G | 0.022   | 0.002 | 2.90E-24  | 103.282 |
| rs6593513  | C | T | (0.016) | 0.002 | 7.80E-13  | 51.327  |
| rs661403   | G | A | (0.023) | 0.002 | 2.20E-24  | 103.831 |
| rs6664992  | G | A | 0.013   | 0.002 | 2.00E-09  | 36.021  |
| rs6685530  | T | C | (0.014) | 0.002 | 5.80E-09  | 33.898  |
| rs669556   | T | C | 0.015   | 0.003 | 4.90E-08  | 29.774  |
| rs6696074  | T | C | 0.018   | 0.002 | 5.30E-17  | 70.204  |
| rs6699095  | C | T | 0.014   | 0.002 | 5.00E-11  | 43.161  |
| rs6706095  | G | T | 0.021   | 0.002 | 1.10E-16  | 68.795  |
| rs67224956 | C | T | 0.018   | 0.003 | 1.30E-10  | 41.357  |
| rs6734238  | G | A | 0.014   | 0.002 | 2.90E-11  | 44.229  |
| rs6742904  | G | T | 0.016   | 0.002 | 1.10E-12  | 50.632  |
| rs6786088  | C | T | (0.025) | 0.002 | 7.90E-28  | 119.551 |
| rs68116612 | A | G | 0.032   | 0.003 | 1.30E-33  | 145.977 |
| rs6815294  | A | G | 0.030   | 0.002 | 6.20E-45  | 197.822 |
| rs6845648  | T | C | 0.024   | 0.002 | 2.20E-29  | 126.656 |
| rs6862111  | C | G | (0.018) | 0.002 | 2.30E-14  | 58.231  |
| rs6883116  | C | T | (0.014) | 0.002 | 6.50E-11  | 42.678  |
| rs6883827  | G | A | 0.037   | 0.002 | 1.30E-64  | 288.122 |
| rs6993770  | T | A | (0.056) | 0.002 | 7.69E-125 | 564.775 |
| rs6997505  | A | C | (0.017) | 0.003 | 1.40E-08  | 32.133  |

|            |   |   |         |       |           |         |
|------------|---|---|---------|-------|-----------|---------|
| rs7040705  | A | G | (0.014) | 0.002 | 1.30E-10  | 41.253  |
| rs706819   | C | T | 0.022   | 0.002 | 1.20E-19  | 82.253  |
| rs7080386  | A | C | 0.020   | 0.002 | 2.00E-20  | 85.768  |
| rs7104210  | G | T | 0.066   | 0.002 | 1.60E-170 | 774.843 |
| rs7146395  | C | A | (0.015) | 0.002 | 6.60E-11  | 42.634  |
| rs715      | C | T | (0.017) | 0.002 | 7.10E-14  | 56.044  |
| rs7204146  | G | A | 0.024   | 0.003 | 3.90E-17  | 70.837  |
| rs7213347  | C | G | (0.042) | 0.002 | 3.40E-75  | 336.677 |
| rs7244202  | C | T | (0.032) | 0.002 | 1.00E-49  | 219.747 |
| rs7252328  | G | A | 0.019   | 0.003 | 4.50E-10  | 38.899  |
| rs72806507 | A | G | (0.022) | 0.004 | 9.40E-09  | 32.960  |
| rs72917226 | A | G | 0.027   | 0.004 | 4.60E-10  | 38.857  |
| rs72952310 | T | G | (0.062) | 0.006 | 1.80E-24  | 104.286 |
| rs73167967 | G | T | 0.066   | 0.004 | 2.90E-58  | 258.954 |
| rs73168819 | A | G | 0.016   | 0.002 | 1.10E-13  | 55.259  |
| rs73202036 | G | A | (0.015) | 0.003 | 5.80E-09  | 33.892  |
| rs73307474 | G | T | 0.029   | 0.004 | 4.00E-12  | 48.131  |
| rs73884852 | G | A | (0.025) | 0.004 | 2.80E-09  | 35.351  |
| rs73928486 | A | G | 0.027   | 0.003 | 4.90E-24  | 102.230 |
| rs7413585  | C | T | (0.018) | 0.002 | 3.90E-17  | 70.826  |
| rs74528993 | A | G | 0.024   | 0.004 | 4.00E-08  | 30.147  |
| rs7500731  | A | G | (0.012) | 0.002 | 3.50E-08  | 30.385  |
| rs75107793 | A | G | 0.115   | 0.004 | 1.00E-170 | 775.708 |
| rs75139539 | T | C | 0.052   | 0.006 | 1.20E-18  | 77.765  |
| rs7516366  | C | T | 0.015   | 0.002 | 6.70E-11  | 42.606  |
| rs754388   | C | G | 0.029   | 0.003 | 4.60E-26  | 111.479 |
| rs75612655 | T | C | 0.143   | 0.012 | 3.30E-34  | 148.735 |
| rs7634359  | C | T | (0.015) | 0.002 | 3.70E-12  | 48.273  |
| rs7655560  | A | G | (0.038) | 0.005 | 5.10E-15  | 61.210  |
| rs7671752  | T | C | (0.013) | 0.002 | 1.30E-09  | 36.769  |
| rs76840964 | G | A | (0.033) | 0.003 | 4.70E-24  | 102.341 |
| rs7686818  | G | A | 0.016   | 0.003 | 7.70E-09  | 33.344  |
| rs7705526  | A | C | 0.059   | 0.002 | 3.60E-148 | 672.051 |
| rs7730720  | G | T | 0.014   | 0.002 | 2.00E-11  | 44.988  |
| rs77338166 | G | A | (0.025) | 0.004 | 1.00E-08  | 32.839  |
| rs77427278 | C | T | 0.055   | 0.008 | 8.50E-11  | 42.148  |
| rs7765042  | T | C | 0.014   | 0.002 | 3.90E-10  | 39.169  |
| rs7779873  | A | G | 0.015   | 0.002 | 9.30E-12  | 46.470  |
| rs7789916  | A | G | (0.017) | 0.002 | 8.40E-14  | 55.716  |
| rs77962418 | A | C | 0.142   | 0.007 | 9.50E-88  | 394.327 |
| rs7803075  | G | A | (0.033) | 0.002 | 2.60E-41  | 181.271 |
| rs78261031 | A | G | (0.029) | 0.004 | 9.50E-11  | 41.922  |
| rs7833924  | G | A | 0.031   | 0.002 | 3.00E-47  | 208.431 |
| rs7843131  | T | C | 0.013   | 0.002 | 3.00E-08  | 30.709  |
| rs7855088  | T | C | 0.022   | 0.002 | 6.80E-26  | 110.724 |
| rs78565404 | T | C | 0.150   | 0.005 | 1.00E-200 | 986.490 |
| rs78584627 | T | G | (0.033) | 0.005 | 4.40E-12  | 47.917  |
| rs7865719  | G | A | (0.042) | 0.002 | 2.70E-89  | 401.389 |
| rs78744187 | T | C | (0.037) | 0.004 | 5.50E-22  | 92.882  |
| rs78909033 | A | G | (0.026) | 0.003 | 1.50E-16  | 68.203  |

|            |   |   |         |       |           |         |        |         |
|------------|---|---|---------|-------|-----------|---------|--------|---------|
| rs79010100 | C | T | 0.056   | 0.003 | 1.30E-70  | 315.685 |        |         |
| rs79287178 | A | G | 0.062   | 0.006 | 3.30E-22  | 93.906  |        |         |
| rs79716074 | G | A | 0.014   | 0.002 | 2.00E-10  | 40.447  |        |         |
| rs79755767 | A | G | 0.068   | 0.004 | 1.70E-82  | 370.145 |        |         |
| rs7989654  | A | G | 0.016   | 0.002 | 1.20E-12  | 50.447  |        |         |
| rs8012145  | T | C | 0.013   | 0.002 | 4.10E-08  | 30.118  |        |         |
| rs8037902  | T | C | (0.016) | 0.002 | 8.50E-13  | 51.165  |        |         |
| rs804327   | C | T | 0.012   | 0.002 | 4.60E-08  | 29.872  |        |         |
| rs8052629  | G | A | (0.017) | 0.002 | 8.40E-16  | 64.779  |        |         |
| rs8065615  | C | T | (0.021) | 0.002 | 3.10E-19  | 80.378  |        |         |
| rs8066620  | T | C | (0.018) | 0.002 | 1.40E-15  | 63.825  |        |         |
| rs8069999  | A | G | (0.022) | 0.003 | 7.10E-17  | 69.635  |        |         |
| rs8072157  | A | T | (0.017) | 0.003 | 9.10E-11  | 42.009  |        |         |
| rs8093990  | C | A | 0.020   | 0.002 | 2.90E-20  | 85.052  |        |         |
| rs8098454  | T | C | 0.027   | 0.004 | 7.20E-13  | 51.498  |        |         |
| rs8107139  | C | T | (0.021) | 0.002 | 5.60E-21  | 88.305  |        |         |
| rs8176746  | T | G | (0.050) | 0.004 | 3.20E-30  | 130.481 |        |         |
| rs8178824  | T | C | 0.122   | 0.006 | 2.80E-85  | 382.943 |        |         |
| rs833058   | T | C | 0.016   | 0.002 | 1.00E-12  | 50.826  |        |         |
| rs855791   | G | A | (0.027) | 0.002 | 5.30E-37  | 161.493 |        |         |
| rs865483   | C | A | (0.022) | 0.002 | 1.30E-22  | 95.690  |        |         |
| rs873093   | C | T | 0.020   | 0.002 | 2.10E-19  | 81.142  |        |         |
| rs901481   | G | T | 0.014   | 0.002 | 2.50E-10  | 40.016  |        |         |
| rs928391   | C | T | (0.024) | 0.002 | 8.90E-24  | 101.067 |        |         |
| rs9384844  | T | C | (0.012) | 0.002 | 6.00E-09  | 33.820  |        |         |
| rs9386793  | A | C | 0.021   | 0.002 | 3.30E-23  | 98.446  |        |         |
| rs9394220  | G | T | 0.017   | 0.003 | 9.20E-11  | 41.976  |        |         |
| rs9399141  | C | T | (0.066) | 0.002 | 8.49E-157 | 711.718 |        |         |
| rs941407   | G | A | 0.018   | 0.002 | 1.00E-14  | 59.814  |        |         |
| rs9429767  | A | G | 0.020   | 0.003 | 4.10E-14  | 57.111  |        |         |
| rs947001   | G | A | (0.017) | 0.002 | 2.70E-13  | 53.425  |        |         |
| rs9472113  | C | A | (0.015) | 0.002 | 1.80E-09  | 36.212  |        |         |
| rs9555695  | T | C | (0.019) | 0.002 | 2.80E-18  | 76.020  |        |         |
| rs9635249  | G | A | 0.034   | 0.003 | 2.20E-39  | 172.384 |        |         |
| rs9636888  | T | C | 0.023   | 0.002 | 8.40E-24  | 101.190 |        |         |
| rs9661787  | G | C | 0.017   | 0.003 | 5.60E-10  | 38.440  |        |         |
| rs9730749  | G | A | 0.016   | 0.002 | 5.00E-11  | 43.185  |        |         |
| rs9793310  | C | T | 0.018   | 0.002 | 2.40E-17  | 71.801  |        |         |
| rs9809116  | G | A | 0.017   | 0.002 | 1.20E-14  | 59.615  |        |         |
| rs9904395  | G | A | (0.087) | 0.005 | 3.70E-57  | 253.885 |        |         |
| rs9926463  | C | A | (0.021) | 0.002 | 1.90E-18  | 76.785  |        |         |
| rs9983374  | T | C | 0.022   | 0.002 | 1.10E-19  | 82.397  |        |         |
| rs1006409  | G | A | 0.030   | 0.002 | 7.40E-44  | 192.891 | 66.304 | 154.558 |
| rs10115699 | T | C | (0.019) | 0.002 | 4.90E-15  | 61.281  |        |         |
| rs10136273 | T | G | (0.028) | 0.003 | 1.00E-15  | 64.371  |        |         |
| rs10162365 | T | C | 0.014   | 0.002 | 8.30E-09  | 33.194  |        |         |
| rs10187424 | C | T | (0.019) | 0.002 | 8.20E-18  | 73.895  |        |         |
| rs10281257 | T | C | 0.013   | 0.002 | 7.30E-09  | 33.451  |        |         |
| rs1041403  | T | C | 0.027   | 0.002 | 5.00E-31  | 134.165 |        |         |

Platelet Distribution  
Width

|             |   |   |         |       |           |          |
|-------------|---|---|---------|-------|-----------|----------|
| rs10466710  | G | A | (0.019) | 0.002 | 5.20E-17  | 70.265   |
| rs1046919   | G | A | 0.019   | 0.003 | 8.40E-13  | 51.192   |
| rs1056534   | G | C | (0.023) | 0.002 | 6.40E-26  | 110.858  |
| rs1059196   | T | C | 0.036   | 0.002 | 4.10E-46  | 203.236  |
| rs1060431   | A | G | (0.085) | 0.004 | 3.80E-94  | 423.697  |
| rs10770060  | A | G | 0.022   | 0.003 | 4.40E-19  | 79.664   |
| rs10811665  | C | T | 0.016   | 0.003 | 2.60E-08  | 30.956   |
| rs10818454  | A | G | (0.015) | 0.002 | 6.00E-11  | 42.832   |
| rs10820606  | C | A | (0.059) | 0.003 | 1.70E-115 | 521.870  |
| rs10831688  | G | A | 0.012   | 0.002 | 1.60E-08  | 31.880   |
| rs10852622  | G | A | (0.020) | 0.002 | 2.90E-16  | 66.840   |
| rs10882139  | G | A | (0.015) | 0.002 | 1.50E-11  | 45.599   |
| rs10886430  | G | A | 0.041   | 0.003 | 6.90E-36  | 156.416  |
| rs10899504  | A | C | (0.017) | 0.003 | 1.80E-09  | 36.222   |
| rs10911111  | G | A | 0.093   | 0.003 | 1.00E-200 | 1035.922 |
| rs10928513  | T | C | 0.012   | 0.002 | 2.30E-08  | 31.216   |
| rs10933153  | C | A | 0.022   | 0.002 | 9.60E-25  | 105.487  |
| rs10964620  | A | G | 0.019   | 0.002 | 8.60E-17  | 69.276   |
| rs10971924  | A | G | 0.014   | 0.003 | 1.80E-08  | 31.693   |
| rs11013176  | G | A | (0.023) | 0.002 | 3.20E-22  | 93.965   |
| rs11039216  | T | C | 0.019   | 0.002 | 8.60E-18  | 73.816   |
| rs11082304  | T | G | 0.039   | 0.002 | 1.30E-74  | 333.938  |
| rs11083767  | C | T | 0.049   | 0.002 | 7.19E-102 | 459.207  |
| rs11120218  | A | G | 0.038   | 0.003 | 3.00E-31  | 135.209  |
| rs11123325  | A | G | (0.019) | 0.003 | 9.20E-10  | 37.484   |
| rs1114882   | G | A | 0.020   | 0.002 | 9.80E-20  | 82.647   |
| rs11190846  | T | C | 0.016   | 0.002 | 8.30E-14  | 55.726   |
| rs11204523  | C | G | (0.053) | 0.003 | 3.60E-97  | 437.622  |
| rs11204539  | C | G | 0.063   | 0.004 | 5.10E-49  | 216.556  |
| rs11212628  | A | G | (0.021) | 0.003 | 1.50E-12  | 50.035   |
| rs11224309  | G | C | 0.035   | 0.004 | 1.80E-21  | 90.518   |
| rs11235689  | T | C | 0.038   | 0.002 | 7.00E-67  | 298.503  |
| rs112655727 | A | G | (0.049) | 0.009 | 1.60E-08  | 31.985   |
| rs1126643   | T | C | (0.015) | 0.002 | 3.40E-11  | 43.933   |
| rs112875651 | A | G | (0.021) | 0.002 | 8.50E-22  | 92.037   |
| rs112898119 | G | A | 0.056   | 0.008 | 9.40E-13  | 50.976   |
| rs113227645 | T | G | 0.035   | 0.006 | 3.90E-09  | 34.663   |
| rs113270184 | T | C | (0.032) | 0.003 | 5.40E-31  | 134.023  |
| rs113343095 | A | G | 0.019   | 0.003 | 5.90E-09  | 33.866   |
| rs113543437 | A | G | 0.154   | 0.004 | 1.00E-200 | 1375.504 |
| rs113865680 | C | T | 0.021   | 0.003 | 3.10E-14  | 57.676   |
| rs114282886 | T | C | 0.057   | 0.006 | 9.40E-24  | 100.947  |
| rs114694170 | C | T | (0.117) | 0.005 | 4.30E-143 | 648.678  |
| rs114968084 | A | G | 0.047   | 0.007 | 8.00E-13  | 51.280   |
| rs115352378 | T | A | 0.039   | 0.006 | 5.10E-11  | 43.120   |
| rs11553699  | G | A | 0.111   | 0.003 | 1.00E-200 | 1084.305 |
| rs11576356  | A | G | (0.032) | 0.003 | 1.20E-29  | 127.794  |
| rs11598602  | A | G | (0.024) | 0.003 | 2.90E-18  | 75.952   |
| rs11625026  | T | C | 0.016   | 0.002 | 2.00E-11  | 45.019   |
| rs11649317  | C | T | (0.013) | 0.002 | 4.00E-08  | 30.135   |

|             |   |   |         |       |           |          |
|-------------|---|---|---------|-------|-----------|----------|
| rs11671059  | C | T | 0.033   | 0.004 | 1.20E-18  | 77.652   |
| rs116897918 | C | G | 0.140   | 0.006 | 1.60E-122 | 554.075  |
| rs11696739  | A | G | (0.023) | 0.002 | 4.40E-25  | 107.043  |
| rs117068593 | T | C | 0.028   | 0.003 | 1.20E-24  | 105.053  |
| rs117159862 | A | C | 0.048   | 0.006 | 5.80E-15  | 60.954   |
| rs117172295 | A | T | 0.113   | 0.010 | 3.20E-31  | 135.080  |
| rs11734099  | A | G | (0.062) | 0.003 | 4.70E-107 | 483.015  |
| rs118088320 | A | G | (0.055) | 0.006 | 4.70E-21  | 88.635   |
| rs11993233  | G | A | (0.048) | 0.002 | 1.50E-107 | 485.322  |
| rs12067642  | T | G | 0.027   | 0.003 | 6.10E-26  | 110.929  |
| rs12110     | A | G | 0.042   | 0.003 | 2.00E-54  | 241.372  |
| rs12124281  | A | G | (0.049) | 0.002 | 3.60E-106 | 478.976  |
| rs1212871   | T | C | (0.034) | 0.004 | 5.30E-22  | 92.980   |
| rs12128766  | T | C | (0.021) | 0.002 | 3.60E-23  | 98.294   |
| rs12148513  | T | C | (0.022) | 0.002 | 1.30E-22  | 95.829   |
| rs1219275   | C | T | 0.023   | 0.003 | 3.30E-17  | 71.142   |
| rs12202319  | C | G | 0.018   | 0.003 | 2.30E-10  | 40.216   |
| rs12209838  | T | G | 0.020   | 0.003 | 2.80E-11  | 44.343   |
| rs12324667  | T | A | 0.019   | 0.003 | 3.00E-12  | 48.672   |
| rs12422591  | T | A | 0.016   | 0.003 | 1.00E-08  | 32.841   |
| rs12431359  | C | T | (0.015) | 0.002 | 2.70E-10  | 39.914   |
| rs12451471  | T | C | 0.017   | 0.002 | 7.10E-15  | 60.581   |
| rs1246761   | T | C | (0.017) | 0.002 | 2.60E-14  | 58.001   |
| rs12471773  | A | G | (0.041) | 0.003 | 3.70E-54  | 240.140  |
| rs12480262  | G | A | 0.193   | 0.003 | 1.00E-200 | 3284.797 |
| rs1263618   | C | T | (0.015) | 0.002 | 4.50E-11  | 43.372   |
| rs12640722  | T | A | 0.023   | 0.002 | 5.20E-23  | 97.572   |
| rs12667905  | C | A | 0.025   | 0.002 | 3.10E-31  | 135.143  |
| rs12671118  | A | G | 0.031   | 0.004 | 3.70E-13  | 52.779   |
| rs12738019  | G | A | 0.015   | 0.002 | 6.90E-12  | 47.059   |
| rs1283690   | C | T | 0.015   | 0.002 | 2.20E-12  | 49.313   |
| rs12924211  | C | T | (0.020) | 0.002 | 9.20E-18  | 73.680   |
| rs12936897  | A | G | (0.013) | 0.002 | 3.90E-09  | 34.678   |
| rs12938273  | A | G | (0.053) | 0.002 | 3.70E-131 | 593.830  |
| rs12947510  | G | A | 0.021   | 0.004 | 4.00E-09  | 34.614   |
| rs12981216  | T | C | 0.015   | 0.002 | 1.40E-11  | 45.730   |
| rs12981279  | C | T | (0.016) | 0.002 | 1.20E-13  | 54.948   |
| rs13024657  | T | C | 0.019   | 0.003 | 1.60E-10  | 40.899   |
| rs13033725  | G | C | 0.026   | 0.002 | 3.40E-29  | 125.771  |
| rs13096104  | G | A | (0.023) | 0.004 | 2.90E-08  | 30.787   |
| rs13107325  | T | C | (0.050) | 0.004 | 5.70E-34  | 147.630  |
| rs13122868  | G | T | 0.017   | 0.003 | 1.50E-09  | 36.585   |
| rs13213536  | T | A | (0.018) | 0.002 | 1.90E-13  | 54.067   |
| rs13221668  | C | T | (0.031) | 0.002 | 2.00E-45  | 200.130  |
| rs13224082  | T | A | 0.038   | 0.003 | 4.90E-52  | 230.392  |
| rs13234131  | G | A | (0.027) | 0.003 | 5.50E-17  | 70.132   |
| rs13260471  | G | A | 0.093   | 0.003 | 1.00E-200 | 1128.407 |
| rs13338946  | C | T | 0.016   | 0.002 | 2.90E-11  | 44.240   |
| rs1334577   | A | G | 0.017   | 0.003 | 2.10E-11  | 44.905   |
| rs13389363  | G | A | (0.024) | 0.003 | 1.50E-12  | 50.096   |

|             |   |   |         |       |           |         |
|-------------|---|---|---------|-------|-----------|---------|
| rs138540809 | G | A | (0.029) | 0.004 | 1.30E-12  | 50.333  |
| rs138910471 | A | G | (0.062) | 0.005 | 8.20E-34  | 146.906 |
| rs139619205 | G | A | 0.117   | 0.016 | 1.70E-13  | 54.351  |
| rs140243743 | A | G | 0.056   | 0.008 | 1.80E-13  | 54.210  |
| rs141089639 | G | T | 0.021   | 0.003 | 3.20E-12  | 48.568  |
| rs1420476   | A | T | 0.045   | 0.005 | 8.40E-18  | 73.868  |
| rs1436138   | G | A | 0.014   | 0.002 | 1.20E-10  | 41.512  |
| rs1448319   | G | A | (0.068) | 0.005 | 5.30E-48  | 211.891 |
| rs145375841 | G | T | (0.032) | 0.005 | 1.40E-12  | 50.233  |
| rs1466733   | G | A | 0.027   | 0.003 | 2.00E-25  | 108.600 |
| rs1467509   | C | A | 0.018   | 0.002 | 3.40E-15  | 62.028  |
| rs147289819 | A | C | (0.015) | 0.002 | 3.70E-11  | 43.777  |
| rs1500922   | C | G | (0.016) | 0.003 | 1.70E-10  | 40.810  |
| rs151154524 | A | G | (0.038) | 0.006 | 3.80E-11  | 43.715  |
| rs1552272   | T | C | 0.028   | 0.002 | 2.30E-35  | 153.982 |
| rs1562833   | G | A | 0.031   | 0.004 | 1.60E-16  | 68.083  |
| rs1565818   | C | G | (0.021) | 0.003 | 1.10E-09  | 37.154  |
| rs1603584   | G | A | (0.021) | 0.004 | 1.90E-08  | 31.559  |
| rs1613662   | A | G | 0.083   | 0.003 | 6.70E-181 | 822.566 |
| rs167374    | G | A | 0.015   | 0.002 | 1.20E-11  | 45.910  |
| rs16877096  | C | T | (0.015) | 0.003 | 1.00E-08  | 32.807  |
| rs16937003  | A | G | (0.074) | 0.008 | 9.40E-22  | 91.838  |
| rs17138723  | G | C | 0.024   | 0.003 | 1.70E-20  | 86.117  |
| rs17154970  | G | C | 0.052   | 0.008 | 6.10E-11  | 42.802  |
| rs1719285   | A | T | (0.084) | 0.003 | 1.10E-177 | 807.838 |
| rs17292943  | A | G | 0.014   | 0.003 | 1.80E-08  | 31.728  |
| rs1735538   | G | A | 0.018   | 0.002 | 1.50E-12  | 50.021  |
| rs17463814  | A | G | (0.020) | 0.003 | 2.00E-14  | 58.532  |
| rs17558323  | G | C | 0.014   | 0.003 | 1.50E-08  | 32.002  |
| rs17776046  | A | G | 0.017   | 0.002 | 7.40E-14  | 55.964  |
| rs17840761  | A | G | 0.014   | 0.002 | 5.00E-11  | 43.159  |
| rs1790961   | G | T | 0.052   | 0.002 | 4.30E-130 | 588.918 |
| rs1801282   | G | C | (0.026) | 0.003 | 8.10E-15  | 60.310  |
| rs182120    | C | A | (0.014) | 0.002 | 1.20E-09  | 36.979  |
| rs186317244 | T | G | (0.021) | 0.003 | 1.70E-09  | 36.321  |
| rs1870028   | T | C | 0.038   | 0.004 | 2.10E-20  | 85.728  |
| rs1888488   | T | C | (0.014) | 0.002 | 3.90E-10  | 39.159  |
| rs1890946   | C | T | (0.012) | 0.002 | 1.10E-08  | 32.645  |
| rs1909834   | C | A | 0.019   | 0.002 | 4.40E-17  | 70.609  |
| rs1913715   | A | G | 0.013   | 0.002 | 4.70E-09  | 34.304  |
| rs1980532   | G | A | (0.059) | 0.002 | 1.90E-160 | 728.517 |
| rs1981627   | G | A | (0.043) | 0.002 | 1.90E-86  | 388.384 |
| rs1992443   | A | G | (0.037) | 0.002 | 1.60E-51  | 228.010 |
| rs1995534   | C | A | (0.015) | 0.002 | 3.90E-10  | 39.150  |
| rs200891    | G | T | (0.019) | 0.002 | 6.10E-17  | 69.933  |
| rs2058785   | T | C | (0.015) | 0.002 | 3.10E-11  | 44.129  |
| rs2064228   | G | T | (0.017) | 0.002 | 5.20E-13  | 52.141  |
| rs2072114   | G | A | 0.019   | 0.003 | 5.40E-09  | 34.030  |
| rs2093475   | G | A | (0.017) | 0.002 | 1.40E-14  | 59.195  |
| rs214058    | A | G | 0.037   | 0.002 | 2.40E-64  | 286.894 |

|            |   |   |         |       |           |          |
|------------|---|---|---------|-------|-----------|----------|
| rs2141247  | A | C | (0.013) | 0.002 | 1.50E-09  | 36.593   |
| rs2153960  | A | G | (0.024) | 0.002 | 1.80E-24  | 104.192  |
| rs2230585  | A | G | 0.019   | 0.002 | 9.30E-19  | 78.210   |
| rs2236686  | A | G | (0.014) | 0.002 | 1.40E-08  | 32.223   |
| rs2249250  | T | G | 0.024   | 0.002 | 8.90E-25  | 105.621  |
| rs2267461  | T | C | 0.090   | 0.002 | 1.00E-200 | 1739.611 |
| rs2281721  | T | C | (0.025) | 0.002 | 7.00E-29  | 124.373  |
| rs229576   | T | A | (0.020) | 0.003 | 3.30E-12  | 48.484   |
| rs2298989  | C | T | 0.021   | 0.002 | 2.90E-22  | 94.182   |
| rs2321235  | G | A | 0.026   | 0.002 | 3.30E-30  | 130.401  |
| rs2326842  | T | C | (0.027) | 0.003 | 1.60E-22  | 95.395   |
| rs2327528  | A | G | (0.024) | 0.003 | 9.30E-20  | 82.749   |
| rs2429511  | C | T | (0.017) | 0.002 | 2.30E-15  | 62.757   |
| rs2455425  | C | T | 0.022   | 0.004 | 1.40E-08  | 32.195   |
| rs2500220  | T | C | 0.027   | 0.002 | 1.70E-35  | 154.598  |
| rs2520099  | C | T | (0.021) | 0.002 | 4.50E-18  | 75.103   |
| rs2544026  | A | T | 0.016   | 0.002 | 1.50E-10  | 41.085   |
| rs254415   | T | G | 0.031   | 0.002 | 3.90E-40  | 175.836  |
| rs259334   | T | C | 0.036   | 0.004 | 1.50E-19  | 81.851   |
| rs2632372  | C | T | (0.012) | 0.002 | 5.60E-09  | 33.965   |
| rs2723086  | T | C | (0.018) | 0.002 | 2.70E-15  | 62.503   |
| rs2756119  | A | G | (0.018) | 0.002 | 1.40E-15  | 63.741   |
| rs2796881  | C | T | (0.018) | 0.003 | 2.80E-09  | 35.299   |
| rs2823037  | T | C | 0.016   | 0.002 | 2.90E-11  | 44.235   |
| rs2823295  | C | T | (0.015) | 0.003 | 4.90E-08  | 29.738   |
| rs2836430  | G | T | 0.019   | 0.003 | 3.00E-09  | 35.156   |
| rs2842061  | A | G | 0.023   | 0.002 | 2.50E-23  | 98.984   |
| rs28550009 | G | A | (0.019) | 0.003 | 1.60E-08  | 31.948   |
| rs2857460  | T | C | 0.023   | 0.003 | 2.10E-18  | 76.592   |
| rs28609328 | A | G | 0.025   | 0.002 | 1.90E-28  | 122.365  |
| rs28678897 | A | G | (0.044) | 0.004 | 1.20E-27  | 118.779  |
| rs28819766 | T | C | 0.016   | 0.003 | 3.70E-09  | 34.756   |
| rs28883140 | A | G | (0.029) | 0.003 | 2.70E-29  | 126.269  |
| rs2892409  | T | C | (0.016) | 0.002 | 4.80E-14  | 56.803   |
| rs293570   | G | A | 0.018   | 0.002 | 5.70E-15  | 60.997   |
| rs2950393  | A | G | (0.062) | 0.002 | 1.60E-162 | 738.042  |
| rs2999155  | A | G | 0.045   | 0.002 | 6.10E-99  | 445.734  |
| rs342300   | A | T | 0.076   | 0.002 | 1.00E-200 | 1108.923 |
| rs34834842 | G | A | 0.110   | 0.006 | 4.70E-83  | 372.758  |
| rs34870936 | A | G | 0.015   | 0.003 | 2.10E-08  | 31.359   |
| rs35017286 | G | A | (0.016) | 0.002 | 1.70E-13  | 54.383   |
| rs351728   | C | T | (0.013) | 0.002 | 6.50E-09  | 33.674   |
| rs35188965 | T | C | (0.027) | 0.002 | 3.10E-34  | 148.838  |
| rs35267052 | G | T | (0.021) | 0.004 | 4.00E-09  | 34.622   |
| rs35445107 | C | T | 0.016   | 0.003 | 4.10E-08  | 30.115   |
| rs35563401 | T | C | (0.018) | 0.002 | 2.40E-16  | 67.241   |
| rs35564315 | A | C | (0.027) | 0.003 | 2.60E-20  | 85.304   |
| rs3557     | G | T | (0.053) | 0.004 | 2.50E-45  | 199.654  |
| rs3742003  | A | G | (0.034) | 0.003 | 6.10E-37  | 161.213  |
| rs3753650  | A | C | 0.028   | 0.004 | 3.20E-15  | 62.120   |

|             |   |   |         |       |           |          |
|-------------|---|---|---------|-------|-----------|----------|
| rs3767812   | A | G | (0.034) | 0.003 | 1.40E-40  | 177.948  |
| rs3801995   | T | C | (0.014) | 0.002 | 8.70E-09  | 33.113   |
| rs3804749   | T | C | 0.041   | 0.002 | 6.40E-78  | 349.176  |
| rs3824632   | A | G | (0.019) | 0.002 | 7.60E-19  | 78.597   |
| rs3918226   | T | C | (0.026) | 0.004 | 1.70E-10  | 40.728   |
| rs392794    | T | C | 0.017   | 0.002 | 4.70E-12  | 47.788   |
| rs3937015   | C | T | (0.092) | 0.008 | 2.60E-31  | 135.457  |
| rs4068540   | G | A | (0.014) | 0.002 | 1.00E-08  | 32.786   |
| rs4099245   | A | G | (0.018) | 0.002 | 3.90E-16  | 66.304   |
| rs41284294  | C | T | 0.068   | 0.010 | 3.10E-11  | 44.112   |
| rs41307187  | C | T | 0.016   | 0.003 | 3.00E-10  | 39.650   |
| rs428372    | G | A | (0.021) | 0.002 | 3.20E-17  | 71.231   |
| rs4388959   | A | G | 0.013   | 0.002 | 3.30E-08  | 30.533   |
| rs4529894   | G | C | (0.030) | 0.003 | 4.80E-30  | 129.678  |
| rs45488900  | T | G | 0.076   | 0.004 | 3.80E-98  | 442.090  |
| rs45563932  | T | C | 0.019   | 0.003 | 6.70E-13  | 51.635   |
| rs4651254   | C | T | 0.013   | 0.002 | 8.00E-09  | 33.267   |
| rs4654396   | C | T | 0.012   | 0.002 | 1.30E-08  | 32.386   |
| rs4711890   | G | C | (0.043) | 0.002 | 4.80E-70  | 313.025  |
| rs4714958   | T | C | 0.032   | 0.003 | 2.70E-24  | 103.435  |
| rs4721764   | A | G | (0.025) | 0.003 | 3.60E-22  | 93.744   |
| rs4735333   | A | G | (0.018) | 0.002 | 1.20E-17  | 73.107   |
| rs4759076   | C | T | (0.030) | 0.002 | 2.10E-42  | 186.198  |
| rs4775128   | A | G | (0.014) | 0.002 | 1.90E-09  | 36.095   |
| rs4783186   | C | T | 0.063   | 0.003 | 1.40E-82  | 370.571  |
| rs4843185   | A | G | (0.039) | 0.002 | 1.10E-56  | 251.791  |
| rs4859470   | G | A | 0.017   | 0.002 | 1.60E-14  | 58.956   |
| rs489296    | G | T | 0.040   | 0.002 | 7.70E-74  | 330.446  |
| rs4908690   | G | T | (0.021) | 0.002 | 7.60E-19  | 78.588   |
| rs4947972   | C | G | (0.014) | 0.002 | 3.90E-08  | 30.184   |
| rs4952071   | T | C | (0.081) | 0.002 | 1.00E-200 | 1315.125 |
| rs4966015   | T | G | 0.029   | 0.003 | 9.00E-22  | 91.922   |
| rs5017497   | G | T | (0.013) | 0.002 | 1.00E-08  | 32.794   |
| rs530059793 | G | A | 0.124   | 0.012 | 4.30E-25  | 107.084  |
| rs539352    | A | C | (0.012) | 0.002 | 3.60E-08  | 30.352   |
| rs540909    | C | T | 0.058   | 0.002 | 9.10E-121 | 546.060  |
| rs549258056 | T | C | 0.059   | 0.009 | 6.10E-11  | 42.778   |
| rs55662460  | A | G | 0.017   | 0.003 | 6.70E-10  | 38.092   |
| rs55838731  | G | A | 0.015   | 0.002 | 2.30E-10  | 40.180   |
| rs55903042  | A | G | 0.016   | 0.002 | 9.10E-11  | 42.006   |
| rs55970551  | T | C | (0.059) | 0.008 | 2.50E-15  | 62.628   |
| rs561655    | A | G | (0.014) | 0.002 | 1.30E-09  | 36.883   |
| rs56340041  | A | G | 0.027   | 0.003 | 7.50E-19  | 78.630   |
| rs56353063  | C | G | 0.015   | 0.003 | 1.30E-09  | 36.879   |
| rs56944467  | T | G | (0.018) | 0.003 | 4.70E-08  | 29.817   |
| rs57680405  | C | T | 0.038   | 0.007 | 5.70E-09  | 33.941   |
| rs5771359   | T | C | 0.021   | 0.003 | 4.20E-11  | 43.500   |
| rs57843631  | T | C | 0.224   | 0.008 | 7.91E-165 | 748.655  |
| rs58679315  | C | G | (0.223) | 0.009 | 7.10E-136 | 615.493  |
| rs59242558  | C | T | (0.016) | 0.002 | 2.50E-11  | 44.532   |

|            |   |   |         |       |           |         |
|------------|---|---|---------|-------|-----------|---------|
| rs606552   | G | A | 0.069   | 0.003 | 2.90E-167 | 759.848 |
| rs6124259  | A | G | 0.019   | 0.002 | 1.40E-17  | 72.883  |
| rs61269268 | C | A | 0.034   | 0.003 | 1.10E-31  | 137.122 |
| rs61751937 | C | G | 0.077   | 0.006 | 1.50E-33  | 145.711 |
| rs61776586 | C | T | 0.017   | 0.003 | 6.60E-09  | 33.663  |
| rs61813831 | G | A | (0.039) | 0.006 | 2.90E-10  | 39.764  |
| rs61851769 | T | C | 0.031   | 0.003 | 6.80E-34  | 147.291 |
| rs61963337 | A | G | 0.024   | 0.003 | 1.80E-18  | 76.892  |
| rs61977313 | T | C | 0.029   | 0.004 | 2.70E-16  | 66.982  |
| rs62021187 | C | G | (0.012) | 0.002 | 3.00E-08  | 30.693  |
| rs62082086 | G | T | 0.038   | 0.006 | 3.50E-10  | 39.387  |
| rs62191340 | A | G | 0.038   | 0.002 | 9.50E-70  | 311.661 |
| rs62231638 | T | C | (0.087) | 0.008 | 6.70E-28  | 119.872 |
| rs62246446 | G | C | 0.047   | 0.003 | 2.00E-61  | 273.500 |
| rs62291089 | G | C | 0.017   | 0.003 | 9.70E-09  | 32.893  |
| rs62363210 | C | T | (0.020) | 0.003 | 1.20E-10  | 41.542  |
| rs62379580 | C | T | 0.032   | 0.002 | 2.70E-45  | 199.511 |
| rs62484217 | C | T | (0.045) | 0.008 | 1.60E-08  | 31.909  |
| rs62527185 | T | C | (0.041) | 0.007 | 2.60E-08  | 30.971  |
| rs62543170 | G | A | 0.023   | 0.002 | 3.80E-27  | 116.462 |
| rs62577098 | G | C | 0.019   | 0.003 | 1.20E-10  | 41.512  |
| rs6453397  | T | C | 0.036   | 0.002 | 7.00E-53  | 234.273 |
| rs6556405  | C | T | 0.026   | 0.002 | 1.20E-24  | 105.034 |
| rs658495   | A | G | 0.029   | 0.005 | 7.90E-09  | 33.299  |
| rs664414   | G | T | 0.016   | 0.002 | 1.30E-12  | 50.386  |
| rs66530629 | A | G | 0.044   | 0.002 | 2.20E-70  | 314.551 |
| rs66793829 | C | G | 0.053   | 0.003 | 9.50E-75  | 334.614 |
| rs6681849  | T | G | (0.035) | 0.002 | 1.10E-56  | 251.774 |
| rs66958635 | C | T | (0.046) | 0.007 | 1.10E-11  | 46.089  |
| rs671339   | G | A | (0.039) | 0.002 | 1.10E-56  | 251.776 |
| rs6796837  | T | C | (0.021) | 0.002 | 2.60E-19  | 80.696  |
| rs6798870  | A | G | (0.021) | 0.002 | 2.00E-23  | 99.442  |
| rs6807029  | C | A | (0.023) | 0.002 | 9.10E-23  | 96.458  |
| rs6808932  | C | A | 0.013   | 0.002 | 9.80E-09  | 32.876  |
| rs685724   | C | T | (0.014) | 0.002 | 9.40E-10  | 37.451  |
| rs688181   | C | T | 0.036   | 0.002 | 1.70E-52  | 232.540 |
| rs6882345  | A | G | 0.016   | 0.002 | 1.90E-12  | 49.573  |
| rs6928810  | T | C | (0.046) | 0.002 | 1.70E-75  | 338.003 |
| rs6952260  | A | T | 0.024   | 0.003 | 1.20E-20  | 86.870  |
| rs6993770  | T | A | 0.061   | 0.002 | 1.70E-145 | 659.695 |
| rs6994859  | A | G | (0.019) | 0.002 | 5.60E-17  | 70.103  |
| rs6999008  | A | G | 0.015   | 0.002 | 3.10E-12  | 48.622  |
| rs7024673  | T | C | (0.016) | 0.002 | 5.80E-12  | 47.397  |
| rs7083045  | G | A | (0.013) | 0.002 | 9.00E-10  | 37.531  |
| rs7094382  | A | G | (0.015) | 0.002 | 6.10E-12  | 47.290  |
| rs7109587  | G | A | 0.018   | 0.003 | 2.00E-12  | 49.436  |
| rs7140110  | C | T | 0.018   | 0.002 | 5.80E-14  | 56.426  |
| rs71427874 | A | G | 0.030   | 0.003 | 5.70E-26  | 111.081 |
| rs7146146  | G | T | 0.013   | 0.002 | 1.10E-09  | 37.164  |
| rs715      | C | T | 0.015   | 0.002 | 4.50E-11  | 43.376  |

|            |   |   |         |       |           |          |
|------------|---|---|---------|-------|-----------|----------|
| rs7163838  | C | T | 0.018   | 0.003 | 6.80E-13  | 51.589   |
| rs718515   | A | G | 0.015   | 0.002 | 9.60E-13  | 50.932   |
| rs7216823  | G | A | (0.025) | 0.003 | 1.60E-17  | 72.536   |
| rs7220663  | C | G | (0.032) | 0.004 | 1.20E-16  | 68.551   |
| rs7255581  | G | A | (0.014) | 0.002 | 7.30E-09  | 33.442   |
| rs72660908 | G | C | 0.024   | 0.002 | 1.30E-27  | 118.514  |
| rs72716951 | C | G | (0.038) | 0.006 | 6.30E-12  | 47.246   |
| rs72717841 | C | T | (0.072) | 0.007 | 6.10E-24  | 101.810  |
| rs72770326 | T | C | 0.045   | 0.008 | 2.80E-09  | 35.327   |
| rs72814539 | T | C | 0.035   | 0.004 | 1.10E-14  | 59.767   |
| rs72821093 | T | A | (0.017) | 0.003 | 3.20E-09  | 35.086   |
| rs72829457 | T | C | (0.032) | 0.003 | 5.50E-21  | 88.349   |
| rs72937257 | C | T | (0.026) | 0.004 | 4.50E-12  | 47.883   |
| rs72952809 | A | G | (0.041) | 0.006 | 3.00E-12  | 48.702   |
| rs72962490 | T | C | (0.023) | 0.004 | 2.70E-08  | 30.929   |
| rs72997616 | A | C | 0.025   | 0.004 | 2.30E-11  | 44.715   |
| rs73037168 | T | C | (0.029) | 0.003 | 5.20E-19  | 79.338   |
| rs73166052 | T | A | (0.016) | 0.002 | 2.20E-11  | 44.754   |
| rs73168819 | A | G | (0.019) | 0.002 | 2.60E-18  | 76.135   |
| rs73195801 | G | C | 0.050   | 0.005 | 9.60E-23  | 96.351   |
| rs73200023 | A | G | (0.035) | 0.006 | 2.80E-08  | 30.817   |
| rs73205782 | G | T | (0.021) | 0.003 | 2.10E-14  | 58.413   |
| rs73307905 | C | A | 0.015   | 0.003 | 2.50E-08  | 31.074   |
| rs7336979  | G | A | 0.012   | 0.002 | 1.90E-08  | 31.595   |
| rs73573834 | C | A | 0.042   | 0.005 | 6.60E-20  | 83.439   |
| rs74227709 | A | G | 0.137   | 0.004 | 1.00E-200 | 1084.031 |
| rs74332546 | A | G | 0.057   | 0.006 | 2.30E-18  | 76.430   |
| rs74728564 | G | A | (0.042) | 0.006 | 1.70E-11  | 45.283   |
| rs7514180  | A | G | 0.015   | 0.003 | 3.60E-09  | 34.826   |
| rs75497613 | A | C | 0.044   | 0.005 | 1.60E-18  | 77.175   |
| rs7551141  | A | G | (0.016) | 0.002 | 3.60E-14  | 57.389   |
| rs75868777 | C | A | (0.041) | 0.007 | 1.50E-08  | 32.088   |
| rs7593042  | T | A | 0.135   | 0.004 | 1.00E-200 | 1146.405 |
| rs7595550  | A | C | (0.022) | 0.003 | 2.00E-10  | 40.422   |
| rs7649045  | C | T | 0.016   | 0.002 | 4.00E-13  | 52.623   |
| rs7650165  | T | C | 0.024   | 0.002 | 1.20E-22  | 95.874   |
| rs76560907 | C | A | (0.094) | 0.003 | 4.20E-185 | 841.921  |
| rs76642326 | T | C | 0.036   | 0.004 | 2.60E-16  | 67.081   |
| rs76803699 | A | G | 0.034   | 0.006 | 4.70E-08  | 29.831   |
| rs7696969  | G | T | (0.039) | 0.002 | 2.80E-68  | 304.888  |
| rs7734992  | C | T | 0.014   | 0.002 | 3.80E-10  | 39.200   |
| rs77460011 | T | C | (0.042) | 0.007 | 2.40E-09  | 35.656   |
| rs7763043  | T | A | 0.013   | 0.002 | 7.50E-09  | 33.409   |
| rs77632732 | G | A | 0.094   | 0.011 | 3.80E-17  | 70.881   |
| rs7800558  | C | T | 0.019   | 0.002 | 1.60E-18  | 77.076   |
| rs78070886 | G | A | 0.057   | 0.005 | 3.60E-28  | 121.102  |
| rs7808005  | T | C | 0.032   | 0.002 | 1.00E-40  | 178.513  |
| rs78296535 | G | T | (0.075) | 0.007 | 7.20E-30  | 128.889  |
| rs783      | A | G | 0.016   | 0.002 | 3.00E-13  | 53.230   |
| rs78327070 | A | G | 0.024   | 0.004 | 3.80E-09  | 34.744   |

|            |   |   |         |       |           |         |
|------------|---|---|---------|-------|-----------|---------|
| rs78690665 | C | A | 0.043   | 0.004 | 9.40E-26  | 110.079 |
| rs78831364 | A | C | (0.038) | 0.005 | 1.70E-15  | 63.371  |
| rs78909033 | A | G | (0.042) | 0.003 | 4.40E-40  | 175.606 |
| rs7896518  | G | A | (0.025) | 0.002 | 3.80E-29  | 125.603 |
| rs79376190 | G | C | 0.022   | 0.003 | 1.80E-12  | 49.686  |
| rs7949566  | A | G | 0.020   | 0.002 | 4.40E-20  | 84.232  |
| rs7956772  | A | C | 0.022   | 0.004 | 7.00E-10  | 38.022  |
| rs79716587 | A | G | 0.040   | 0.003 | 1.80E-34  | 149.955 |
| rs7974988  | G | A | 0.014   | 0.002 | 2.80E-10  | 39.794  |
| rs802171   | G | A | 0.036   | 0.002 | 3.60E-61  | 272.260 |
| rs8048275  | G | A | (0.033) | 0.005 | 2.40E-10  | 40.087  |
| rs8077177  | T | C | (0.056) | 0.006 | 7.50E-24  | 101.415 |
| rs8098454  | T | C | (0.028) | 0.004 | 3.70E-13  | 52.802  |
| rs8106212  | T | C | 0.139   | 0.010 | 2.30E-43  | 190.673 |
| rs8113491  | T | C | (0.013) | 0.002 | 4.10E-09  | 34.564  |
| rs8116503  | T | C | (0.016) | 0.003 | 1.00E-09  | 37.262  |
| rs847680   | C | T | 0.028   | 0.003 | 4.00E-22  | 93.513  |
| rs855791   | G | A | 0.021   | 0.002 | 6.20E-22  | 92.653  |
| rs8705     | A | G | 0.013   | 0.002 | 1.10E-08  | 32.581  |
| rs883394   | T | C | 0.018   | 0.002 | 9.20E-17  | 69.131  |
| rs9376091  | T | C | 0.018   | 0.002 | 1.90E-13  | 54.115  |
| rs9392441  | C | T | 0.013   | 0.002 | 3.00E-09  | 35.176  |
| rs9410343  | A | G | 0.044   | 0.004 | 1.40E-23  | 100.112 |
| rs9471669  | G | A | 0.028   | 0.003 | 1.40E-27  | 118.404 |
| rs9534458  | A | G | 0.068   | 0.002 | 2.40E-195 | 888.988 |
| rs9549753  | A | C | 0.047   | 0.002 | 6.10E-103 | 464.118 |
| rs9591136  | A | C | (0.019) | 0.002 | 2.00E-18  | 76.655  |
| rs964184   | C | G | (0.082) | 0.003 | 8.00E-147 | 665.832 |
| rs9900637  | A | C | 0.015   | 0.002 | 6.30E-12  | 47.238  |
| rs9919955  | C | G | 0.020   | 0.003 | 3.40E-12  | 48.416  |
| rs9925477  | G | T | 0.030   | 0.002 | 1.90E-42  | 186.456 |
| rs9937322  | C | G | 0.014   | 0.002 | 2.20E-10  | 40.279  |
| rs9971708  | T | A | (0.025) | 0.003 | 2.60E-17  | 71.648  |
| rs9997942  | G | A | 0.014   | 0.002 | 6.80E-09  | 33.579  |
| rs1006409  | G | A | 0.030   | 0.002 | 7.40E-44  | 192.891 |
| rs10115699 | T | C | (0.019) | 0.002 | 4.90E-15  | 61.281  |
| rs10136273 | T | G | (0.028) | 0.003 | 1.00E-15  | 64.371  |
| rs10162365 | T | C | 0.014   | 0.002 | 8.30E-09  | 33.194  |
| rs10187424 | C | T | (0.019) | 0.002 | 8.20E-18  | 73.895  |
| rs10281257 | T | C | 0.013   | 0.002 | 7.30E-09  | 33.451  |
| rs1041403  | T | C | 0.027   | 0.002 | 5.00E-31  | 134.165 |
| rs10466710 | G | A | (0.019) | 0.002 | 5.20E-17  | 70.265  |
| rs1046919  | G | A | 0.019   | 0.003 | 8.40E-13  | 51.192  |
| rs1056534  | G | C | (0.023) | 0.002 | 6.40E-26  | 110.858 |
| rs1059196  | T | C | 0.036   | 0.002 | 4.10E-46  | 203.236 |
| rs1060431  | A | G | (0.085) | 0.004 | 3.80E-94  | 423.697 |
| rs10770060 | A | G | 0.022   | 0.003 | 4.40E-19  | 79.664  |
| rs10811665 | C | T | 0.016   | 0.003 | 2.60E-08  | 30.956  |
| rs10818454 | A | G | (0.015) | 0.002 | 6.00E-11  | 42.832  |
| rs10820606 | C | A | (0.059) | 0.003 | 1.70E-115 | 521.870 |

|             |   |   |         |       |           |          |
|-------------|---|---|---------|-------|-----------|----------|
| rs10831688  | G | A | 0.012   | 0.002 | 1.60E-08  | 31.880   |
| rs10852622  | G | A | (0.020) | 0.002 | 2.90E-16  | 66.840   |
| rs10882139  | G | A | (0.015) | 0.002 | 1.50E-11  | 45.599   |
| rs10886430  | G | A | 0.041   | 0.003 | 6.90E-36  | 156.416  |
| rs10899504  | A | C | (0.017) | 0.003 | 1.80E-09  | 36.222   |
| rs10911111  | G | A | 0.093   | 0.003 | 1.00E-200 | 1035.922 |
| rs10928513  | T | C | 0.012   | 0.002 | 2.30E-08  | 31.216   |
| rs10933153  | C | A | 0.022   | 0.002 | 9.60E-25  | 105.487  |
| rs10964620  | A | G | 0.019   | 0.002 | 8.60E-17  | 69.276   |
| rs10971924  | A | G | 0.014   | 0.003 | 1.80E-08  | 31.693   |
| rs11013176  | G | A | (0.023) | 0.002 | 3.20E-22  | 93.965   |
| rs11039216  | T | C | 0.019   | 0.002 | 8.60E-18  | 73.816   |
| rs11082304  | T | G | 0.039   | 0.002 | 1.30E-74  | 333.938  |
| rs11083767  | C | T | 0.049   | 0.002 | 7.19E-102 | 459.207  |
| rs11120218  | A | G | 0.038   | 0.003 | 3.00E-31  | 135.209  |
| rs11123325  | A | G | (0.019) | 0.003 | 9.20E-10  | 37.484   |
| rs1114882   | G | A | 0.020   | 0.002 | 9.80E-20  | 82.647   |
| rs11190846  | T | C | 0.016   | 0.002 | 8.30E-14  | 55.726   |
| rs11204523  | C | G | (0.053) | 0.003 | 3.60E-97  | 437.622  |
| rs11204539  | C | G | 0.063   | 0.004 | 5.10E-49  | 216.556  |
| rs11212628  | A | G | (0.021) | 0.003 | 1.50E-12  | 50.035   |
| rs11224309  | G | C | 0.035   | 0.004 | 1.80E-21  | 90.518   |
| rs11235689  | T | C | 0.038   | 0.002 | 7.00E-67  | 298.503  |
| rs112655727 | A | G | (0.049) | 0.009 | 1.60E-08  | 31.985   |
| rs1126643   | T | C | (0.015) | 0.002 | 3.40E-11  | 43.933   |
| rs112875651 | A | G | (0.021) | 0.002 | 8.50E-22  | 92.037   |
| rs112898119 | G | A | 0.056   | 0.008 | 9.40E-13  | 50.976   |
| rs113227645 | T | G | 0.035   | 0.006 | 3.90E-09  | 34.663   |
| rs113270184 | T | C | (0.032) | 0.003 | 5.40E-31  | 134.023  |
| rs113343095 | A | G | 0.019   | 0.003 | 5.90E-09  | 33.866   |
| rs113543437 | A | G | 0.154   | 0.004 | 1.00E-200 | 1375.504 |
| rs113865680 | C | T | 0.021   | 0.003 | 3.10E-14  | 57.676   |
| rs114282886 | T | C | 0.057   | 0.006 | 9.40E-24  | 100.947  |
| rs114694170 | C | T | (0.117) | 0.005 | 4.30E-143 | 648.678  |
| rs114968084 | A | G | 0.047   | 0.007 | 8.00E-13  | 51.280   |
| rs115352378 | T | A | 0.039   | 0.006 | 5.10E-11  | 43.120   |
| rs11553699  | G | A | 0.111   | 0.003 | 1.00E-200 | 1084.305 |
| rs11576356  | A | G | (0.032) | 0.003 | 1.20E-29  | 127.794  |
| rs11598602  | A | G | (0.024) | 0.003 | 2.90E-18  | 75.952   |
| rs11625026  | T | C | 0.016   | 0.002 | 2.00E-11  | 45.019   |
| rs11649317  | C | T | (0.013) | 0.002 | 4.00E-08  | 30.135   |
| rs11671059  | C | T | 0.033   | 0.004 | 1.20E-18  | 77.652   |
| rs116897918 | C | G | 0.140   | 0.006 | 1.60E-122 | 554.075  |
| rs11696739  | A | G | (0.023) | 0.002 | 4.40E-25  | 107.043  |
| rs117068593 | T | C | 0.028   | 0.003 | 1.20E-24  | 105.053  |
| rs117159862 | A | C | 0.048   | 0.006 | 5.80E-15  | 60.954   |
| rs117172295 | A | T | 0.113   | 0.010 | 3.20E-31  | 135.080  |
| rs11734099  | A | G | (0.062) | 0.003 | 4.70E-107 | 483.015  |
| rs118088320 | A | G | (0.055) | 0.006 | 4.70E-21  | 88.635   |
| rs11993233  | G | A | (0.048) | 0.002 | 1.50E-107 | 485.322  |

|             |   |   |         |       |           |          |
|-------------|---|---|---------|-------|-----------|----------|
| rs12067642  | T | G | 0.027   | 0.003 | 6.10E-26  | 110.929  |
| rs12110     | A | G | 0.042   | 0.003 | 2.00E-54  | 241.372  |
| rs12124281  | A | G | (0.049) | 0.002 | 3.60E-106 | 478.976  |
| rs1212871   | T | C | (0.034) | 0.004 | 5.30E-22  | 92.980   |
| rs12128766  | T | C | (0.021) | 0.002 | 3.60E-23  | 98.294   |
| rs12148513  | T | C | (0.022) | 0.002 | 1.30E-22  | 95.829   |
| rs1219275   | C | T | 0.023   | 0.003 | 3.30E-17  | 71.142   |
| rs12202319  | C | G | 0.018   | 0.003 | 2.30E-10  | 40.216   |
| rs12209838  | T | G | 0.020   | 0.003 | 2.80E-11  | 44.343   |
| rs12324667  | T | A | 0.019   | 0.003 | 3.00E-12  | 48.672   |
| rs12422591  | T | A | 0.016   | 0.003 | 1.00E-08  | 32.841   |
| rs12431359  | C | T | (0.015) | 0.002 | 2.70E-10  | 39.914   |
| rs12451471  | T | C | 0.017   | 0.002 | 7.10E-15  | 60.581   |
| rs1246761   | T | C | (0.017) | 0.002 | 2.60E-14  | 58.001   |
| rs12471773  | A | G | (0.041) | 0.003 | 3.70E-54  | 240.140  |
| rs12480262  | G | A | 0.193   | 0.003 | 1.00E-200 | 3284.797 |
| rs1263618   | C | T | (0.015) | 0.002 | 4.50E-11  | 43.372   |
| rs12640722  | T | A | 0.023   | 0.002 | 5.20E-23  | 97.572   |
| rs12667905  | C | A | 0.025   | 0.002 | 3.10E-31  | 135.143  |
| rs12671118  | A | G | 0.031   | 0.004 | 3.70E-13  | 52.779   |
| rs12738019  | G | A | 0.015   | 0.002 | 6.90E-12  | 47.059   |
| rs1283690   | C | T | 0.015   | 0.002 | 2.20E-12  | 49.313   |
| rs12924211  | C | T | (0.020) | 0.002 | 9.20E-18  | 73.680   |
| rs12936897  | A | G | (0.013) | 0.002 | 3.90E-09  | 34.678   |
| rs12938273  | A | G | (0.053) | 0.002 | 3.70E-131 | 593.830  |
| rs12947510  | G | A | 0.021   | 0.004 | 4.00E-09  | 34.614   |
| rs12981216  | T | C | 0.015   | 0.002 | 1.40E-11  | 45.730   |
| rs12981279  | C | T | (0.016) | 0.002 | 1.20E-13  | 54.948   |
| rs13024657  | T | C | 0.019   | 0.003 | 1.60E-10  | 40.899   |
| rs13033725  | G | C | 0.026   | 0.002 | 3.40E-29  | 125.771  |
| rs13096104  | G | A | (0.023) | 0.004 | 2.90E-08  | 30.787   |
| rs13107325  | T | C | (0.050) | 0.004 | 5.70E-34  | 147.630  |
| rs13122868  | G | T | 0.017   | 0.003 | 1.50E-09  | 36.585   |
| rs13213536  | T | A | (0.018) | 0.002 | 1.90E-13  | 54.067   |
| rs13221668  | C | T | (0.031) | 0.002 | 2.00E-45  | 200.130  |
| rs13224082  | T | A | 0.038   | 0.003 | 4.90E-52  | 230.392  |
| rs13234131  | G | A | (0.027) | 0.003 | 5.50E-17  | 70.132   |
| rs13260471  | G | A | 0.093   | 0.003 | 1.00E-200 | 1128.407 |
| rs13338946  | C | T | 0.016   | 0.002 | 2.90E-11  | 44.240   |
| rs1334577   | A | G | 0.017   | 0.003 | 2.10E-11  | 44.905   |
| rs13389363  | G | A | (0.024) | 0.003 | 1.50E-12  | 50.096   |
| rs138540809 | G | A | (0.029) | 0.004 | 1.30E-12  | 50.333   |
| rs138910471 | A | G | (0.062) | 0.005 | 8.20E-34  | 146.906  |
| rs139619205 | G | A | 0.117   | 0.016 | 1.70E-13  | 54.351   |
| rs140243743 | A | G | 0.056   | 0.008 | 1.80E-13  | 54.210   |
| rs141089639 | G | T | 0.021   | 0.003 | 3.20E-12  | 48.568   |
| rs1420476   | A | T | 0.045   | 0.005 | 8.40E-18  | 73.868   |
| rs1436138   | G | A | 0.014   | 0.002 | 1.20E-10  | 41.512   |
| rs1448319   | G | A | (0.068) | 0.005 | 5.30E-48  | 211.891  |
| rs145375841 | G | T | (0.032) | 0.005 | 1.40E-12  | 50.233   |

|             |   |   |         |       |           |          |
|-------------|---|---|---------|-------|-----------|----------|
| rs1466733   | G | A | 0.027   | 0.003 | 2.00E-25  | 108.600  |
| rs1467509   | C | A | 0.018   | 0.002 | 3.40E-15  | 62.028   |
| rs147289819 | A | C | (0.015) | 0.002 | 3.70E-11  | 43.777   |
| rs1500922   | C | G | (0.016) | 0.003 | 1.70E-10  | 40.810   |
| rs151154524 | A | G | (0.038) | 0.006 | 3.80E-11  | 43.715   |
| rs1552272   | T | C | 0.028   | 0.002 | 2.30E-35  | 153.982  |
| rs1562833   | G | A | 0.031   | 0.004 | 1.60E-16  | 68.083   |
| rs1565818   | C | G | (0.021) | 0.003 | 1.10E-09  | 37.154   |
| rs1603584   | G | A | (0.021) | 0.004 | 1.90E-08  | 31.559   |
| rs1613662   | A | G | 0.083   | 0.003 | 6.70E-181 | 822.566  |
| rs167374    | G | A | 0.015   | 0.002 | 1.20E-11  | 45.910   |
| rs16877096  | C | T | (0.015) | 0.003 | 1.00E-08  | 32.807   |
| rs16937003  | A | G | (0.074) | 0.008 | 9.40E-22  | 91.838   |
| rs17138723  | G | C | 0.024   | 0.003 | 1.70E-20  | 86.117   |
| rs17154970  | G | C | 0.052   | 0.008 | 6.10E-11  | 42.802   |
| rs1719285   | A | T | (0.084) | 0.003 | 1.10E-177 | 807.838  |
| rs17292943  | A | G | 0.014   | 0.003 | 1.80E-08  | 31.728   |
| rs1735538   | G | A | 0.018   | 0.002 | 1.50E-12  | 50.021   |
| rs17463814  | A | G | (0.020) | 0.003 | 2.00E-14  | 58.532   |
| rs17558323  | G | C | 0.014   | 0.003 | 1.50E-08  | 32.002   |
| rs17776046  | A | G | 0.017   | 0.002 | 7.40E-14  | 55.964   |
| rs17840761  | A | G | 0.014   | 0.002 | 5.00E-11  | 43.159   |
| rs1790961   | G | T | 0.052   | 0.002 | 4.30E-130 | 588.918  |
| rs1801282   | G | C | (0.026) | 0.003 | 8.10E-15  | 60.310   |
| rs182120    | C | A | (0.014) | 0.002 | 1.20E-09  | 36.979   |
| rs186317244 | T | G | (0.021) | 0.003 | 1.70E-09  | 36.321   |
| rs1870028   | T | C | 0.038   | 0.004 | 2.10E-20  | 85.728   |
| rs1888488   | T | C | (0.014) | 0.002 | 3.90E-10  | 39.159   |
| rs1890946   | C | T | (0.012) | 0.002 | 1.10E-08  | 32.645   |
| rs1909834   | C | A | 0.019   | 0.002 | 4.40E-17  | 70.609   |
| rs1913715   | A | G | 0.013   | 0.002 | 4.70E-09  | 34.304   |
| rs1980532   | G | A | (0.059) | 0.002 | 1.90E-160 | 728.517  |
| rs1981627   | G | A | (0.043) | 0.002 | 1.90E-86  | 388.384  |
| rs1992443   | A | G | (0.037) | 0.002 | 1.60E-51  | 228.010  |
| rs1995534   | C | A | (0.015) | 0.002 | 3.90E-10  | 39.150   |
| rs200891    | G | T | (0.019) | 0.002 | 6.10E-17  | 69.933   |
| rs2058785   | T | C | (0.015) | 0.002 | 3.10E-11  | 44.129   |
| rs2064228   | G | T | (0.017) | 0.002 | 5.20E-13  | 52.141   |
| rs2072114   | G | A | 0.019   | 0.003 | 5.40E-09  | 34.030   |
| rs2093475   | G | A | (0.017) | 0.002 | 1.40E-14  | 59.195   |
| rs214058    | A | G | 0.037   | 0.002 | 2.40E-64  | 286.894  |
| rs2141247   | A | C | (0.013) | 0.002 | 1.50E-09  | 36.593   |
| rs2153960   | A | G | (0.024) | 0.002 | 1.80E-24  | 104.192  |
| rs2230585   | A | G | 0.019   | 0.002 | 9.30E-19  | 78.210   |
| rs2236686   | A | G | (0.014) | 0.002 | 1.40E-08  | 32.223   |
| rs2249250   | T | G | 0.024   | 0.002 | 8.90E-25  | 105.621  |
| rs2267461   | T | C | 0.090   | 0.002 | 1.00E-200 | 1739.611 |
| rs2281721   | T | C | (0.025) | 0.002 | 7.00E-29  | 124.373  |
| rs229576    | T | A | (0.020) | 0.003 | 3.30E-12  | 48.484   |
| rs2298989   | C | T | 0.021   | 0.002 | 2.90E-22  | 94.182   |

|            |   |   |         |       |           |          |
|------------|---|---|---------|-------|-----------|----------|
| rs2321235  | G | A | 0.026   | 0.002 | 3.30E-30  | 130.401  |
| rs2326842  | T | C | (0.027) | 0.003 | 1.60E-22  | 95.395   |
| rs2327528  | A | G | (0.024) | 0.003 | 9.30E-20  | 82.749   |
| rs2429511  | C | T | (0.017) | 0.002 | 2.30E-15  | 62.757   |
| rs2455425  | C | T | 0.022   | 0.004 | 1.40E-08  | 32.195   |
| rs2500220  | T | C | 0.027   | 0.002 | 1.70E-35  | 154.598  |
| rs2520099  | C | T | (0.021) | 0.002 | 4.50E-18  | 75.103   |
| rs2544026  | A | T | 0.016   | 0.002 | 1.50E-10  | 41.085   |
| rs254415   | T | G | 0.031   | 0.002 | 3.90E-40  | 175.836  |
| rs259334   | T | C | 0.036   | 0.004 | 1.50E-19  | 81.851   |
| rs2632372  | C | T | (0.012) | 0.002 | 5.60E-09  | 33.965   |
| rs2723086  | T | C | (0.018) | 0.002 | 2.70E-15  | 62.503   |
| rs2756119  | A | G | (0.018) | 0.002 | 1.40E-15  | 63.741   |
| rs2796881  | C | T | (0.018) | 0.003 | 2.80E-09  | 35.299   |
| rs2823037  | T | C | 0.016   | 0.002 | 2.90E-11  | 44.235   |
| rs2823295  | C | T | (0.015) | 0.003 | 4.90E-08  | 29.738   |
| rs2836430  | G | T | 0.019   | 0.003 | 3.00E-09  | 35.156   |
| rs2842061  | A | G | 0.023   | 0.002 | 2.50E-23  | 98.984   |
| rs28550009 | G | A | (0.019) | 0.003 | 1.60E-08  | 31.948   |
| rs2857460  | T | C | 0.023   | 0.003 | 2.10E-18  | 76.592   |
| rs28609328 | A | G | 0.025   | 0.002 | 1.90E-28  | 122.365  |
| rs28678897 | A | G | (0.044) | 0.004 | 1.20E-27  | 118.779  |
| rs28819766 | T | C | 0.016   | 0.003 | 3.70E-09  | 34.756   |
| rs28883140 | A | G | (0.029) | 0.003 | 2.70E-29  | 126.269  |
| rs2892409  | T | C | (0.016) | 0.002 | 4.80E-14  | 56.803   |
| rs293570   | G | A | 0.018   | 0.002 | 5.70E-15  | 60.997   |
| rs2950393  | A | G | (0.062) | 0.002 | 1.60E-162 | 738.042  |
| rs2999155  | A | G | 0.045   | 0.002 | 6.10E-99  | 445.734  |
| rs342300   | A | T | 0.076   | 0.002 | 1.00E-200 | 1108.923 |
| rs34834842 | G | A | 0.110   | 0.006 | 4.70E-83  | 372.758  |
| rs34870936 | A | G | 0.015   | 0.003 | 2.10E-08  | 31.359   |
| rs35017286 | G | A | (0.016) | 0.002 | 1.70E-13  | 54.383   |
| rs351728   | C | T | (0.013) | 0.002 | 6.50E-09  | 33.674   |
| rs35188965 | T | C | (0.027) | 0.002 | 3.10E-34  | 148.838  |
| rs35267052 | G | T | (0.021) | 0.004 | 4.00E-09  | 34.622   |
| rs35445107 | C | T | 0.016   | 0.003 | 4.10E-08  | 30.115   |
| rs35563401 | T | C | (0.018) | 0.002 | 2.40E-16  | 67.241   |
| rs35564315 | A | C | (0.027) | 0.003 | 2.60E-20  | 85.304   |
| rs3557     | G | T | (0.053) | 0.004 | 2.50E-45  | 199.654  |
| rs3742003  | A | G | (0.034) | 0.003 | 6.10E-37  | 161.213  |
| rs3753650  | A | C | 0.028   | 0.004 | 3.20E-15  | 62.120   |
| rs3767812  | A | G | (0.034) | 0.003 | 1.40E-40  | 177.948  |
| rs3801995  | T | C | (0.014) | 0.002 | 8.70E-09  | 33.113   |
| rs3804749  | T | C | 0.041   | 0.002 | 6.40E-78  | 349.176  |
| rs3824632  | A | G | (0.019) | 0.002 | 7.60E-19  | 78.597   |
| rs3918226  | T | C | (0.026) | 0.004 | 1.70E-10  | 40.728   |
| rs392794   | T | C | 0.017   | 0.002 | 4.70E-12  | 47.788   |
| rs3937015  | C | T | (0.092) | 0.008 | 2.60E-31  | 135.457  |
| rs4068540  | G | A | (0.014) | 0.002 | 1.00E-08  | 32.786   |
| rs4099245  | A | G | (0.018) | 0.002 | 3.90E-16  | 66.304   |

|             |   |   |         |       |           |          |
|-------------|---|---|---------|-------|-----------|----------|
| rs41284294  | C | T | 0.068   | 0.010 | 3.10E-11  | 44.112   |
| rs41307187  | C | T | 0.016   | 0.003 | 3.00E-10  | 39.650   |
| rs428372    | G | A | (0.021) | 0.002 | 3.20E-17  | 71.231   |
| rs4388959   | A | G | 0.013   | 0.002 | 3.30E-08  | 30.533   |
| rs4529894   | G | C | (0.030) | 0.003 | 4.80E-30  | 129.678  |
| rs45488900  | T | G | 0.076   | 0.004 | 3.80E-98  | 442.090  |
| rs45563932  | T | C | 0.019   | 0.003 | 6.70E-13  | 51.635   |
| rs4651254   | C | T | 0.013   | 0.002 | 8.00E-09  | 33.267   |
| rs4654396   | C | T | 0.012   | 0.002 | 1.30E-08  | 32.386   |
| rs4711890   | G | C | (0.043) | 0.002 | 4.80E-70  | 313.025  |
| rs4714958   | T | C | 0.032   | 0.003 | 2.70E-24  | 103.435  |
| rs4721764   | A | G | (0.025) | 0.003 | 3.60E-22  | 93.744   |
| rs4735333   | A | G | (0.018) | 0.002 | 1.20E-17  | 73.107   |
| rs4759076   | C | T | (0.030) | 0.002 | 2.10E-42  | 186.198  |
| rs4775128   | A | G | (0.014) | 0.002 | 1.90E-09  | 36.095   |
| rs4783186   | C | T | 0.063   | 0.003 | 1.40E-82  | 370.571  |
| rs4843185   | A | G | (0.039) | 0.002 | 1.10E-56  | 251.791  |
| rs4859470   | G | A | 0.017   | 0.002 | 1.60E-14  | 58.956   |
| rs489296    | G | T | 0.040   | 0.002 | 7.70E-74  | 330.446  |
| rs4908690   | G | T | (0.021) | 0.002 | 7.60E-19  | 78.588   |
| rs4947972   | C | G | (0.014) | 0.002 | 3.90E-08  | 30.184   |
| rs4952071   | T | C | (0.081) | 0.002 | 1.00E-200 | 1315.125 |
| rs4966015   | T | G | 0.029   | 0.003 | 9.00E-22  | 91.922   |
| rs5017497   | G | T | (0.013) | 0.002 | 1.00E-08  | 32.794   |
| rs530059793 | G | A | 0.124   | 0.012 | 4.30E-25  | 107.084  |
| rs539352    | A | C | (0.012) | 0.002 | 3.60E-08  | 30.352   |
| rs540909    | C | T | 0.058   | 0.002 | 9.10E-121 | 546.060  |
| rs549258056 | T | C | 0.059   | 0.009 | 6.10E-11  | 42.778   |
| rs55662460  | A | G | 0.017   | 0.003 | 6.70E-10  | 38.092   |
| rs55838731  | G | A | 0.015   | 0.002 | 2.30E-10  | 40.180   |
| rs55903042  | A | G | 0.016   | 0.002 | 9.10E-11  | 42.006   |
| rs55970551  | T | C | (0.059) | 0.008 | 2.50E-15  | 62.628   |
| rs561655    | A | G | (0.014) | 0.002 | 1.30E-09  | 36.883   |
| rs56340041  | A | G | 0.027   | 0.003 | 7.50E-19  | 78.630   |
| rs56353063  | C | G | 0.015   | 0.003 | 1.30E-09  | 36.879   |
| rs56944467  | T | G | (0.018) | 0.003 | 4.70E-08  | 29.817   |
| rs57680405  | C | T | 0.038   | 0.007 | 5.70E-09  | 33.941   |
| rs5771359   | T | C | 0.021   | 0.003 | 4.20E-11  | 43.500   |
| rs57843631  | T | C | 0.224   | 0.008 | 7.91E-165 | 748.655  |
| rs58679315  | C | G | (0.223) | 0.009 | 7.10E-136 | 615.493  |
| rs59242558  | C | T | (0.016) | 0.002 | 2.50E-11  | 44.532   |
| rs606552    | G | A | 0.069   | 0.003 | 2.90E-167 | 759.848  |
| rs6124259   | A | G | 0.019   | 0.002 | 1.40E-17  | 72.883   |
| rs61269268  | C | A | 0.034   | 0.003 | 1.10E-31  | 137.122  |
| rs61751937  | C | G | 0.077   | 0.006 | 1.50E-33  | 145.711  |
| rs61776586  | C | T | 0.017   | 0.003 | 6.60E-09  | 33.663   |
| rs61813831  | G | A | (0.039) | 0.006 | 2.90E-10  | 39.764   |
| rs61851769  | T | C | 0.031   | 0.003 | 6.80E-34  | 147.291  |
| rs61963337  | A | G | 0.024   | 0.003 | 1.80E-18  | 76.892   |
| rs61977313  | T | C | 0.029   | 0.004 | 2.70E-16  | 66.982   |

|            |   |   |         |       |           |         |
|------------|---|---|---------|-------|-----------|---------|
| rs62021187 | C | G | (0.012) | 0.002 | 3.00E-08  | 30.693  |
| rs62082086 | G | T | 0.038   | 0.006 | 3.50E-10  | 39.387  |
| rs62191340 | A | G | 0.038   | 0.002 | 9.50E-70  | 311.661 |
| rs62231638 | T | C | (0.087) | 0.008 | 6.70E-28  | 119.872 |
| rs62246446 | G | C | 0.047   | 0.003 | 2.00E-61  | 273.500 |
| rs62291089 | G | C | 0.017   | 0.003 | 9.70E-09  | 32.893  |
| rs62363210 | C | T | (0.020) | 0.003 | 1.20E-10  | 41.542  |
| rs62379580 | C | T | 0.032   | 0.002 | 2.70E-45  | 199.511 |
| rs62484217 | C | T | (0.045) | 0.008 | 1.60E-08  | 31.909  |
| rs62527185 | T | C | (0.041) | 0.007 | 2.60E-08  | 30.971  |
| rs62543170 | G | A | 0.023   | 0.002 | 3.80E-27  | 116.462 |
| rs62577098 | G | C | 0.019   | 0.003 | 1.20E-10  | 41.512  |
| rs6453397  | T | C | 0.036   | 0.002 | 7.00E-53  | 234.273 |
| rs6556405  | C | T | 0.026   | 0.002 | 1.20E-24  | 105.034 |
| rs658495   | A | G | 0.029   | 0.005 | 7.90E-09  | 33.299  |
| rs664414   | G | T | 0.016   | 0.002 | 1.30E-12  | 50.386  |
| rs66530629 | A | G | 0.044   | 0.002 | 2.20E-70  | 314.551 |
| rs66793829 | C | G | 0.053   | 0.003 | 9.50E-75  | 334.614 |
| rs6681849  | T | G | (0.035) | 0.002 | 1.10E-56  | 251.774 |
| rs66958635 | C | T | (0.046) | 0.007 | 1.10E-11  | 46.089  |
| rs671339   | G | A | (0.039) | 0.002 | 1.10E-56  | 251.776 |
| rs6796837  | T | C | (0.021) | 0.002 | 2.60E-19  | 80.696  |
| rs6798870  | A | G | (0.021) | 0.002 | 2.00E-23  | 99.442  |
| rs6807029  | C | A | (0.023) | 0.002 | 9.10E-23  | 96.458  |
| rs6808932  | C | A | 0.013   | 0.002 | 9.80E-09  | 32.876  |
| rs685724   | C | T | (0.014) | 0.002 | 9.40E-10  | 37.451  |
| rs688181   | C | T | 0.036   | 0.002 | 1.70E-52  | 232.540 |
| rs6882345  | A | G | 0.016   | 0.002 | 1.90E-12  | 49.573  |
| rs6928810  | T | C | (0.046) | 0.002 | 1.70E-75  | 338.003 |
| rs6952260  | A | T | 0.024   | 0.003 | 1.20E-20  | 86.870  |
| rs6993770  | T | A | 0.061   | 0.002 | 1.70E-145 | 659.695 |
| rs6994859  | A | G | (0.019) | 0.002 | 5.60E-17  | 70.103  |
| rs6999008  | A | G | 0.015   | 0.002 | 3.10E-12  | 48.622  |
| rs7024673  | T | C | (0.016) | 0.002 | 5.80E-12  | 47.397  |
| rs7083045  | G | A | (0.013) | 0.002 | 9.00E-10  | 37.531  |
| rs7094382  | A | G | (0.015) | 0.002 | 6.10E-12  | 47.290  |
| rs7109587  | G | A | 0.018   | 0.003 | 2.00E-12  | 49.436  |
| rs7140110  | C | T | 0.018   | 0.002 | 5.80E-14  | 56.426  |
| rs71427874 | A | G | 0.030   | 0.003 | 5.70E-26  | 111.081 |
| rs7146146  | G | T | 0.013   | 0.002 | 1.10E-09  | 37.164  |
| rs715      | C | T | 0.015   | 0.002 | 4.50E-11  | 43.376  |
| rs7163838  | C | T | 0.018   | 0.003 | 6.80E-13  | 51.589  |
| rs718515   | A | G | 0.015   | 0.002 | 9.60E-13  | 50.932  |
| rs7216823  | G | A | (0.025) | 0.003 | 1.60E-17  | 72.536  |
| rs7220663  | C | G | (0.032) | 0.004 | 1.20E-16  | 68.551  |
| rs7255581  | G | A | (0.014) | 0.002 | 7.30E-09  | 33.442  |
| rs72660908 | G | C | 0.024   | 0.002 | 1.30E-27  | 118.514 |
| rs72716951 | C | G | (0.038) | 0.006 | 6.30E-12  | 47.246  |
| rs72717841 | C | T | (0.072) | 0.007 | 6.10E-24  | 101.810 |
| rs72770326 | T | C | 0.045   | 0.008 | 2.80E-09  | 35.327  |

|            |   |   |         |       |           |          |
|------------|---|---|---------|-------|-----------|----------|
| rs72814539 | T | C | 0.035   | 0.004 | 1.10E-14  | 59.767   |
| rs72821093 | T | A | (0.017) | 0.003 | 3.20E-09  | 35.086   |
| rs72829457 | T | C | (0.032) | 0.003 | 5.50E-21  | 88.349   |
| rs72937257 | C | T | (0.026) | 0.004 | 4.50E-12  | 47.883   |
| rs72952809 | A | G | (0.041) | 0.006 | 3.00E-12  | 48.702   |
| rs72962490 | T | C | (0.023) | 0.004 | 2.70E-08  | 30.929   |
| rs72997616 | A | C | 0.025   | 0.004 | 2.30E-11  | 44.715   |
| rs73037168 | T | C | (0.029) | 0.003 | 5.20E-19  | 79.338   |
| rs73166052 | T | A | (0.016) | 0.002 | 2.20E-11  | 44.754   |
| rs73168819 | A | G | (0.019) | 0.002 | 2.60E-18  | 76.135   |
| rs73195801 | G | C | 0.050   | 0.005 | 9.60E-23  | 96.351   |
| rs73200023 | A | G | (0.035) | 0.006 | 2.80E-08  | 30.817   |
| rs73205782 | G | T | (0.021) | 0.003 | 2.10E-14  | 58.413   |
| rs73307905 | C | A | 0.015   | 0.003 | 2.50E-08  | 31.074   |
| rs7336979  | G | A | 0.012   | 0.002 | 1.90E-08  | 31.595   |
| rs73573834 | C | A | 0.042   | 0.005 | 6.60E-20  | 83.439   |
| rs74227709 | A | G | 0.137   | 0.004 | 1.00E-200 | 1084.031 |
| rs74332546 | A | G | 0.057   | 0.006 | 2.30E-18  | 76.430   |
| rs74728564 | G | A | (0.042) | 0.006 | 1.70E-11  | 45.283   |
| rs7514180  | A | G | 0.015   | 0.003 | 3.60E-09  | 34.826   |
| rs75497613 | A | C | 0.044   | 0.005 | 1.60E-18  | 77.175   |
| rs7551141  | A | G | (0.016) | 0.002 | 3.60E-14  | 57.389   |
| rs75868777 | C | A | (0.041) | 0.007 | 1.50E-08  | 32.088   |
| rs7593042  | T | A | 0.135   | 0.004 | 1.00E-200 | 1146.405 |
| rs7595550  | A | C | (0.022) | 0.003 | 2.00E-10  | 40.422   |
| rs7649045  | C | T | 0.016   | 0.002 | 4.00E-13  | 52.623   |
| rs7650165  | T | C | 0.024   | 0.002 | 1.20E-22  | 95.874   |
| rs76560907 | C | A | (0.094) | 0.003 | 4.20E-185 | 841.921  |
| rs76642326 | T | C | 0.036   | 0.004 | 2.60E-16  | 67.081   |
| rs76803699 | A | G | 0.034   | 0.006 | 4.70E-08  | 29.831   |
| rs7696969  | G | T | (0.039) | 0.002 | 2.80E-68  | 304.888  |
| rs7734992  | C | T | 0.014   | 0.002 | 3.80E-10  | 39.200   |
| rs77460011 | T | C | (0.042) | 0.007 | 2.40E-09  | 35.656   |
| rs7763043  | T | A | 0.013   | 0.002 | 7.50E-09  | 33.409   |
| rs77632732 | G | A | 0.094   | 0.011 | 3.80E-17  | 70.881   |
| rs7800558  | C | T | 0.019   | 0.002 | 1.60E-18  | 77.076   |
| rs78070886 | G | A | 0.057   | 0.005 | 3.60E-28  | 121.102  |
| rs7808005  | T | C | 0.032   | 0.002 | 1.00E-40  | 178.513  |
| rs78296535 | G | T | (0.075) | 0.007 | 7.20E-30  | 128.889  |
| rs783      | A | G | 0.016   | 0.002 | 3.00E-13  | 53.230   |
| rs78327070 | A | G | 0.024   | 0.004 | 3.80E-09  | 34.744   |
| rs78690665 | C | A | 0.043   | 0.004 | 9.40E-26  | 110.079  |
| rs78831364 | A | C | (0.038) | 0.005 | 1.70E-15  | 63.371   |
| rs78909033 | A | G | (0.042) | 0.003 | 4.40E-40  | 175.606  |
| rs7896518  | G | A | (0.025) | 0.002 | 3.80E-29  | 125.603  |
| rs79376190 | G | C | 0.022   | 0.003 | 1.80E-12  | 49.686   |
| rs7949566  | A | G | 0.020   | 0.002 | 4.40E-20  | 84.232   |
| rs7956772  | A | C | 0.022   | 0.004 | 7.00E-10  | 38.022   |
| rs79716587 | A | G | 0.040   | 0.003 | 1.80E-34  | 149.955  |
| rs7974988  | G | A | 0.014   | 0.002 | 2.80E-10  | 39.794   |

|                             |            |   |   |         |       |           |          |        |         |
|-----------------------------|------------|---|---|---------|-------|-----------|----------|--------|---------|
|                             | rs802171   | G | A | 0.036   | 0.002 | 3.60E-61  | 272.260  |        |         |
|                             | rs8048275  | G | A | (0.033) | 0.005 | 2.40E-10  | 40.087   |        |         |
|                             | rs8077177  | T | C | (0.056) | 0.006 | 7.50E-24  | 101.415  |        |         |
|                             | rs8098454  | T | C | (0.028) | 0.004 | 3.70E-13  | 52.802   |        |         |
|                             | rs8106212  | T | C | 0.139   | 0.010 | 2.30E-43  | 190.673  |        |         |
|                             | rs8113491  | T | C | (0.013) | 0.002 | 4.10E-09  | 34.564   |        |         |
|                             | rs8116503  | T | C | (0.016) | 0.003 | 1.00E-09  | 37.262   |        |         |
|                             | rs847680   | C | T | 0.028   | 0.003 | 4.00E-22  | 93.513   |        |         |
|                             | rs855791   | G | A | 0.021   | 0.002 | 6.20E-22  | 92.653   |        |         |
|                             | rs8705     | A | G | 0.013   | 0.002 | 1.10E-08  | 32.581   |        |         |
|                             | rs883394   | T | C | 0.018   | 0.002 | 9.20E-17  | 69.131   |        |         |
|                             | rs9376091  | T | C | 0.018   | 0.002 | 1.90E-13  | 54.115   |        |         |
|                             | rs9392441  | C | T | 0.013   | 0.002 | 3.00E-09  | 35.176   |        |         |
|                             | rs9410343  | A | G | 0.044   | 0.004 | 1.40E-23  | 100.112  |        |         |
|                             | rs9471669  | G | A | 0.028   | 0.003 | 1.40E-27  | 118.404  |        |         |
|                             | rs9534458  | A | G | 0.068   | 0.002 | 2.40E-195 | 888.988  |        |         |
|                             | rs9549753  | A | C | 0.047   | 0.002 | 6.10E-103 | 464.118  |        |         |
|                             | rs9591136  | A | C | (0.019) | 0.002 | 2.00E-18  | 76.655   |        |         |
|                             | rs964184   | C | G | (0.082) | 0.003 | 8.00E-147 | 665.832  |        |         |
|                             | rs9900637  | A | C | 0.015   | 0.002 | 6.30E-12  | 47.238   |        |         |
|                             | rs9919955  | C | G | 0.020   | 0.003 | 3.40E-12  | 48.416   |        |         |
|                             | rs9925477  | G | T | 0.030   | 0.002 | 1.90E-42  | 186.456  |        |         |
|                             | rs9937322  | C | G | 0.014   | 0.002 | 2.20E-10  | 40.279   |        |         |
|                             | rs9971708  | T | A | (0.025) | 0.003 | 2.60E-17  | 71.648   |        |         |
|                             | rs9997942  | G | A | 0.014   | 0.002 | 6.80E-09  | 33.579   |        |         |
| <b>Mean Platelet Volume</b> | rs10047928 | A | G | 0.029   | 0.002 | 1.80E-35  | 154.496  | 80.621 | 197.652 |
|                             | rs10048745 | A | G | 0.014   | 0.002 | 3.90E-09  | 34.682   |        |         |
|                             | rs10113898 | G | A | (0.013) | 0.002 | 1.10E-09  | 37.087   |        |         |
|                             | rs10212636 | C | T | 0.021   | 0.002 | 6.30E-19  | 78.962   |        |         |
|                             | rs10237268 | C | A | (0.021) | 0.004 | 2.20E-08  | 31.283   |        |         |
|                             | rs10418205 | G | A | 0.020   | 0.002 | 5.30E-21  | 88.403   |        |         |
|                             | rs10459246 | T | G | (0.067) | 0.002 | 1.00E-200 | 1027.431 |        |         |
|                             | rs1047891  | A | C | 0.030   | 0.002 | 3.50E-43  | 189.829  |        |         |
|                             | rs10506015 | C | G | (0.016) | 0.003 | 7.30E-10  | 37.943   |        |         |
|                             | rs1059196  | T | C | 0.049   | 0.002 | 1.50E-93  | 420.949  |        |         |
|                             | rs10777748 | G | T | (0.013) | 0.002 | 4.30E-08  | 29.992   |        |         |
|                             | rs10813766 | G | T | (0.055) | 0.002 | 1.20E-141 | 641.964  |        |         |
|                             | rs10820606 | C | A | (0.034) | 0.002 | 1.80E-43  | 191.149  |        |         |
|                             | rs10844279 | G | T | (0.052) | 0.003 | 5.60E-71  | 317.309  |        |         |
|                             | rs10886437 | T | C | 0.035   | 0.003 | 7.40E-39  | 170.012  |        |         |
|                             | rs10894020 | C | T | (0.014) | 0.002 | 1.20E-10  | 41.442   |        |         |
|                             | rs10896024 | G | A | (0.031) | 0.002 | 2.60E-49  | 217.880  |        |         |
|                             | rs10940072 | A | G | 0.022   | 0.002 | 3.00E-26  | 112.329  |        |         |
|                             | rs10947613 | A | G | (0.017) | 0.002 | 3.60E-14  | 57.383   |        |         |
|                             | rs10961948 | C | T | (0.016) | 0.003 | 1.40E-08  | 32.240   |        |         |
|                             | rs10970979 | G | A | 0.045   | 0.002 | 4.10E-90  | 405.205  |        |         |
|                             | rs11071720 | C | T | (0.058) | 0.002 | 1.50E-148 | 673.809  |        |         |
|                             | rs11072496 | T | C | 0.026   | 0.003 | 7.80E-20  | 83.107   |        |         |
|                             | rs11075750 | G | A | (0.020) | 0.002 | 3.90E-20  | 84.471   |        |         |

|             |   |   |         |       |           |          |
|-------------|---|---|---------|-------|-----------|----------|
| rs11078288  | G | A | (0.056) | 0.009 | 1.90E-10  | 40.557   |
| rs11082304  | T | G | 0.045   | 0.002 | 5.70E-107 | 482.630  |
| rs11083766  | C | T | 0.068   | 0.002 | 1.00E-200 | 981.616  |
| rs11121012  | G | A | (0.031) | 0.002 | 1.50E-46  | 205.257  |
| rs11121529  | G | C | 0.082   | 0.003 | 4.30E-144 | 653.292  |
| rs11128264  | T | C | (0.013) | 0.002 | 4.90E-10  | 38.733   |
| rs111592250 | A | G | 0.020   | 0.003 | 3.40E-10  | 39.421   |
| rs11168257  | G | A | (0.018) | 0.002 | 1.90E-15  | 63.157   |
| rs11186859  | G | C | 0.013   | 0.002 | 6.00E-09  | 33.819   |
| rs11195945  | T | C | 0.054   | 0.003 | 2.20E-64  | 286.997  |
| rs112100699 | T | C | 0.015   | 0.003 | 2.40E-08  | 31.172   |
| rs1122234   | T | C | 0.059   | 0.008 | 1.20E-14  | 59.499   |
| rs11229075  | C | A | (0.030) | 0.002 | 6.30E-38  | 165.756  |
| rs11240341  | C | T | (0.073) | 0.002 | 1.00E-200 | 1133.704 |
| rs112467797 | G | A | (0.063) | 0.008 | 3.60E-14  | 57.372   |
| rs11247735  | A | G | (0.013) | 0.002 | 1.20E-10  | 41.439   |
| rs1126643   | T | C | (0.012) | 0.002 | 7.80E-09  | 33.331   |
| rs112744251 | T | C | (0.028) | 0.004 | 4.90E-11  | 43.212   |
| rs113848517 | G | A | (0.081) | 0.005 | 4.70E-51  | 225.876  |
| rs114427647 | T | C | 0.065   | 0.005 | 1.80E-38  | 168.192  |
| rs114694170 | C | T | (0.140) | 0.004 | 1.00E-200 | 1018.988 |
| rs114968084 | A | G | 0.086   | 0.006 | 2.60E-42  | 185.807  |
| rs115060008 | C | A | (0.019) | 0.004 | 4.60E-08  | 29.862   |
| rs115770471 | T | A | (0.067) | 0.010 | 1.60E-11  | 45.373   |
| rs1158569   | C | A | (0.041) | 0.002 | 3.70E-87  | 391.589  |
| rs11585858  | A | C | (0.026) | 0.002 | 1.60E-26  | 113.568  |
| rs11585973  | G | A | 0.028   | 0.003 | 1.80E-23  | 99.707   |
| rs11627032  | C | T | (0.018) | 0.002 | 1.00E-14  | 59.809   |
| rs11663341  | A | T | 0.015   | 0.002 | 6.30E-10  | 38.233   |
| rs116735454 | C | T | (0.136) | 0.006 | 4.60E-124 | 561.189  |
| rs11681966  | A | C | 0.022   | 0.002 | 5.10E-25  | 106.732  |
| rs11702425  | C | T | (0.014) | 0.002 | 2.70E-10  | 39.912   |
| rs11711320  | T | C | 0.020   | 0.002 | 1.20E-16  | 68.603   |
| rs11712455  | G | A | 0.057   | 0.005 | 2.60E-34  | 149.201  |
| rs117128711 | T | C | (0.052) | 0.006 | 2.70E-19  | 80.621   |
| rs11714248  | A | G | (0.014) | 0.002 | 8.30E-12  | 46.696   |
| rs117173117 | A | T | (0.027) | 0.004 | 1.00E-10  | 41.748   |
| rs117395928 | T | C | (0.076) | 0.010 | 3.50E-14  | 57.420   |
| rs11756806  | T | C | 0.041   | 0.003 | 7.30E-35  | 151.723  |
| rs117625066 | A | G | 0.016   | 0.003 | 1.40E-09  | 36.639   |
| rs11765436  | A | T | (0.015) | 0.002 | 2.30E-12  | 49.194   |
| rs11775560  | G | A | 0.017   | 0.003 | 1.50E-10  | 41.065   |
| rs118001372 | T | C | 0.034   | 0.004 | 1.50E-14  | 59.058   |
| rs118033845 | A | G | 0.068   | 0.006 | 1.00E-32  | 141.893  |
| rs118062113 | A | T | 0.067   | 0.010 | 2.60E-12  | 48.971   |
| rs118170190 | T | C | 0.040   | 0.005 | 9.90E-15  | 59.913   |
| rs11894682  | G | T | (0.106) | 0.005 | 5.11E-107 | 482.876  |
| rs11898764  | T | C | (0.025) | 0.002 | 3.00E-27  | 116.935  |
| rs11936046  | A | G | 0.013   | 0.002 | 2.80E-10  | 39.827   |
| rs11993233  | G | A | (0.031) | 0.002 | 3.40E-49  | 217.389  |

|             |   |   |         |       |           |          |
|-------------|---|---|---------|-------|-----------|----------|
| rs12033187  | T | C | (0.016) | 0.002 | 1.80E-14  | 58.767   |
| rs12041331  | A | G | (0.081) | 0.004 | 8.00E-109 | 491.147  |
| rs12063500  | T | C | 0.046   | 0.004 | 1.80E-29  | 127.072  |
| rs12118065  | A | G | 0.067   | 0.002 | 1.00E-200 | 1045.237 |
| rs12121085  | T | G | (0.011) | 0.002 | 3.40E-08  | 30.482   |
| rs1217414   | A | G | 0.013   | 0.002 | 7.30E-09  | 33.444   |
| rs12217146  | A | G | 0.034   | 0.006 | 3.50E-09  | 34.871   |
| rs12231498  | T | C | 0.065   | 0.002 | 1.00E-200 | 934.029  |
| rs12418931  | A | C | (0.016) | 0.002 | 8.10E-14  | 55.771   |
| rs12426629  | G | C | (0.035) | 0.005 | 1.30E-11  | 45.744   |
| rs12445050  | T | C | 0.055   | 0.003 | 1.20E-74  | 334.218  |
| rs12454829  | A | C | 0.039   | 0.003 | 6.40E-37  | 161.119  |
| rs12465143  | T | C | (0.125) | 0.003 | 1.00E-200 | 1372.945 |
| rs12515523  | A | G | 0.033   | 0.003 | 9.70E-30  | 128.284  |
| rs1255263   | C | G | (0.024) | 0.003 | 8.80E-19  | 78.305   |
| rs12593477  | T | A | 0.021   | 0.003 | 1.70E-12  | 49.769   |
| rs12625404  | T | C | 0.024   | 0.002 | 1.80E-30  | 131.645  |
| rs12637288  | A | G | 0.017   | 0.002 | 2.80E-17  | 71.508   |
| rs12666411  | A | C | (0.043) | 0.004 | 2.10E-30  | 131.326  |
| rs12684581  | G | T | (0.015) | 0.002 | 1.60E-11  | 45.432   |
| rs12827036  | T | G | 0.095   | 0.002 | 1.00E-200 | 2226.299 |
| rs12935775  | A | G | (0.020) | 0.002 | 7.00E-21  | 87.865   |
| rs12940204  | T | C | 0.018   | 0.002 | 5.60E-18  | 74.668   |
| rs12979144  | A | G | 0.022   | 0.002 | 2.90E-25  | 107.840  |
| rs13098005  | T | C | (0.039) | 0.003 | 2.20E-55  | 245.781  |
| rs13224082  | T | A | 0.029   | 0.002 | 7.40E-34  | 147.129  |
| rs13231886  | A | G | (0.018) | 0.002 | 2.20E-18  | 76.513   |
| rs13233747  | A | G | (0.023) | 0.002 | 1.80E-27  | 117.948  |
| rs13257521  | G | C | 0.021   | 0.003 | 5.70E-16  | 65.544   |
| rs13257813  | A | G | (0.023) | 0.002 | 4.50E-25  | 106.987  |
| rs13266369  | G | T | (0.012) | 0.002 | 2.70E-08  | 30.887   |
| rs1328599   | T | G | 0.046   | 0.004 | 1.10E-32  | 141.797  |
| rs13314114  | C | T | 0.044   | 0.002 | 7.80E-102 | 459.040  |
| rs1332835   | T | G | (0.014) | 0.002 | 1.30E-09  | 36.835   |
| rs1354036   | C | T | (0.085) | 0.002 | 1.00E-200 | 1564.736 |
| rs1369236   | G | A | (0.050) | 0.004 | 1.30E-43  | 191.759  |
| rs1385452   | T | G | (0.012) | 0.002 | 1.80E-08  | 31.722   |
| rs138606434 | T | C | 0.051   | 0.006 | 1.90E-18  | 76.751   |
| rs138881192 | A | G | (0.043) | 0.007 | 6.10E-09  | 33.806   |
| rs141492190 | G | A | 0.069   | 0.008 | 3.90E-19  | 79.933   |
| rs1429271   | C | T | 0.024   | 0.003 | 3.10E-14  | 57.656   |
| rs144597972 | T | G | 0.061   | 0.006 | 2.20E-23  | 99.235   |
| rs145175283 | A | G | (0.040) | 0.007 | 3.70E-08  | 30.305   |
| rs146281383 | T | C | (0.038) | 0.006 | 8.90E-10  | 37.553   |
| rs146818600 | T | C | (0.038) | 0.004 | 4.50E-21  | 88.748   |
| rs147583009 | T | C | (0.222) | 0.011 | 2.60E-98  | 442.866  |
| rs1476096   | C | A | (0.027) | 0.002 | 1.70E-39  | 172.933  |
| rs147837849 | C | T | 0.053   | 0.009 | 9.50E-09  | 32.935   |
| rs147886588 | G | C | 0.026   | 0.003 | 7.20E-21  | 87.812   |
| rs148578645 | T | C | (0.052) | 0.006 | 9.10E-16  | 64.626   |

|             |   |   |         |       |           |          |
|-------------|---|---|---------|-------|-----------|----------|
| rs148641669 | T | C | 0.019   | 0.003 | 9.90E-09  | 32.855   |
| rs149039920 | A | G | 0.130   | 0.009 | 1.90E-51  | 227.721  |
| rs149511257 | A | G | 0.091   | 0.012 | 1.00E-14  | 59.900   |
| rs150704300 | G | A | (0.072) | 0.007 | 1.20E-24  | 105.038  |
| rs151234    | C | G | (0.063) | 0.003 | 1.20E-95  | 430.566  |
| rs1518991   | T | C | (0.019) | 0.002 | 1.30E-20  | 86.601   |
| rs1550638   | T | C | (0.019) | 0.003 | 2.10E-11  | 44.870   |
| rs156355    | C | T | 0.060   | 0.002 | 2.50E-175 | 796.935  |
| rs1569419   | C | T | 0.030   | 0.002 | 3.60E-34  | 148.560  |
| rs1635291   | A | G | 0.030   | 0.002 | 1.10E-35  | 155.494  |
| rs1647385   | A | G | (0.033) | 0.003 | 8.70E-35  | 151.373  |
| rs1654425   | C | T | 0.058   | 0.003 | 1.00E-96  | 435.556  |
| rs1664485   | T | A | (0.063) | 0.008 | 2.00E-14  | 58.565   |
| rs16853239  | C | T | 0.038   | 0.004 | 2.10E-22  | 94.799   |
| rs16854980  | C | T | (0.130) | 0.007 | 2.30E-73  | 328.293  |
| rs16918645  | G | A | 0.054   | 0.004 | 1.40E-35  | 154.983  |
| rs16982339  | G | A | (0.021) | 0.003 | 1.20E-15  | 63.993   |
| rs17037388  | G | A | 0.021   | 0.003 | 5.60E-14  | 56.517   |
| rs17068850  | G | A | (0.028) | 0.003 | 1.80E-26  | 113.398  |
| rs17225878  | G | A | 0.118   | 0.003 | 1.00E-200 | 1951.973 |
| rs17231282  | T | C | (0.048) | 0.007 | 9.80E-13  | 50.880   |
| rs17256211  | G | A | 0.016   | 0.002 | 4.50E-14  | 56.949   |
| rs1736150   | A | G | (0.019) | 0.002 | 2.00E-19  | 81.288   |
| rs17382379  | G | A | 0.014   | 0.002 | 5.60E-10  | 38.440   |
| rs174544    | A | C | (0.050) | 0.002 | 2.10E-112 | 507.594  |
| rs17572109  | A | G | (0.037) | 0.002 | 9.60E-53  | 233.628  |
| rs17581728  | T | C | 0.020   | 0.002 | 2.00E-16  | 67.635   |
| rs17593311  | C | G | 0.044   | 0.007 | 3.10E-09  | 35.112   |
| rs17726337  | C | G | (0.087) | 0.005 | 1.10E-56  | 251.651  |
| rs17758695  | T | C | (0.083) | 0.006 | 2.10E-42  | 186.278  |
| rs17853159  | A | G | (0.044) | 0.004 | 5.60E-32  | 138.517  |
| rs1788234   | T | C | (0.064) | 0.002 | 1.00E-200 | 917.519  |
| rs1795964   | G | A | 0.072   | 0.002 | 1.00E-200 | 1111.959 |
| rs182120    | C | A | (0.016) | 0.002 | 5.70E-12  | 47.444   |
| rs184885436 | T | C | (0.081) | 0.009 | 9.90E-18  | 73.525   |
| rs1883258   | T | G | 0.038   | 0.002 | 3.70E-73  | 327.320  |
| rs190712219 | A | G | (0.090) | 0.008 | 1.70E-26  | 113.482  |
| rs1981150   | T | C | (0.027) | 0.003 | 6.40E-17  | 69.847   |
| rs2005277   | C | T | (0.012) | 0.002 | 3.50E-09  | 34.868   |
| rs200838    | C | A | (0.042) | 0.002 | 1.00E-93  | 421.762  |
| rs2014511   | A | G | (0.072) | 0.006 | 6.80E-36  | 156.431  |
| rs203417    | C | T | 0.026   | 0.004 | 1.30E-09  | 36.780   |
| rs203482    | A | G | (0.030) | 0.002 | 4.70E-48  | 212.147  |
| rs2048084   | T | G | 0.016   | 0.002 | 1.40E-14  | 59.187   |
| rs2051105   | A | G | (0.017) | 0.002 | 5.40E-16  | 65.641   |
| rs2057149   | T | C | (0.035) | 0.002 | 3.50E-58  | 258.600  |
| rs2075511   | C | A | (0.011) | 0.002 | 2.40E-08  | 31.108   |
| rs2079356   | T | C | (0.103) | 0.002 | 1.00E-200 | 2283.150 |
| rs2157770   | G | A | (0.043) | 0.002 | 2.10E-80  | 360.588  |
| rs2233713   | C | A | (0.014) | 0.002 | 3.00E-11  | 44.159   |

|            |   |   |         |       |           |          |
|------------|---|---|---------|-------|-----------|----------|
| rs2244700  | G | A | (0.029) | 0.002 | 1.20E-44  | 196.574  |
| rs2268015  | C | T | (0.021) | 0.002 | 2.80E-24  | 103.352  |
| rs2279965  | G | A | (0.020) | 0.002 | 7.00E-19  | 78.772   |
| rs2299979  | T | A | (0.030) | 0.004 | 2.30E-15  | 62.805   |
| rs2304281  | A | G | (0.018) | 0.003 | 4.60E-12  | 47.833   |
| rs2305758  | T | C | 0.023   | 0.002 | 8.20E-25  | 105.799  |
| rs234108   | A | G | 0.016   | 0.002 | 2.80E-14  | 57.845   |
| rs2412653  | A | G | 0.023   | 0.003 | 2.00E-12  | 49.480   |
| rs2422442  | A | C | (0.016) | 0.002 | 4.50E-12  | 47.896   |
| rs2427866  | A | G | 0.012   | 0.002 | 2.00E-08  | 31.499   |
| rs246454   | A | C | 0.014   | 0.002 | 4.90E-11  | 43.230   |
| rs2505084  | A | G | (0.011) | 0.002 | 4.80E-08  | 29.785   |
| rs2516471  | A | G | (0.125) | 0.004 | 1.30E-186 | 848.877  |
| rs2526833  | G | A | 0.012   | 0.002 | 5.60E-09  | 33.958   |
| rs2577627  | G | T | 0.020   | 0.002 | 1.50E-21  | 90.969   |
| rs2594950  | C | G | (0.013) | 0.002 | 1.50E-09  | 36.489   |
| rs2605492  | A | C | (0.066) | 0.002 | 1.00E-200 | 1046.153 |
| rs2639793  | G | A | 0.022   | 0.003 | 4.00E-18  | 75.334   |
| rs2659582  | A | G | 0.016   | 0.002 | 9.50E-14  | 55.473   |
| rs2691475  | A | G | 0.020   | 0.002 | 8.90E-21  | 87.391   |
| rs2709865  | C | T | 0.070   | 0.004 | 3.00E-58  | 258.854  |
| rs2723242  | G | A | 0.017   | 0.002 | 1.40E-12  | 50.202   |
| rs2723261  | T | C | 0.017   | 0.002 | 5.90E-15  | 60.923   |
| rs2730347  | T | A | (0.019) | 0.003 | 6.70E-09  | 33.615   |
| rs2789422  | A | G | 0.030   | 0.002 | 3.10E-47  | 208.361  |
| rs2794868  | G | A | (0.052) | 0.006 | 4.60E-18  | 75.056   |
| rs2800446  | A | T | (0.024) | 0.003 | 2.70E-18  | 76.087   |
| rs2834735  | C | T | (0.014) | 0.002 | 1.60E-10  | 40.900   |
| rs28396651 | G | A | 0.032   | 0.002 | 4.40E-53  | 235.207  |
| rs28507876 | G | A | (0.025) | 0.002 | 3.20E-24  | 103.116  |
| rs2856650  | A | G | 0.019   | 0.002 | 1.80E-17  | 72.371   |
| rs2857464  | C | A | 0.031   | 0.002 | 1.60E-35  | 154.721  |
| rs28594922 | G | A | (0.018) | 0.002 | 1.70E-14  | 58.813   |
| rs28681431 | A | G | 0.022   | 0.003 | 1.90E-18  | 76.778   |
| rs287899   | T | C | (0.013) | 0.002 | 9.50E-09  | 32.945   |
| rs293570   | G | A | (0.015) | 0.002 | 6.10E-11  | 42.779   |
| rs2966431  | A | G | (0.021) | 0.003 | 1.70E-10  | 40.737   |
| rs3013439  | G | T | 0.024   | 0.002 | 3.30E-33  | 144.132  |
| rs34036230 | A | C | 0.027   | 0.003 | 2.20E-17  | 71.969   |
| rs34110295 | G | A | (0.019) | 0.003 | 7.90E-14  | 55.842   |
| rs34346558 | C | A | (0.035) | 0.003 | 1.00E-42  | 187.645  |
| rs34350312 | A | T | 0.031   | 0.003 | 2.20E-31  | 135.803  |
| rs34415062 | A | G | (0.024) | 0.003 | 3.90E-19  | 79.900   |
| rs34426467 | A | T | 0.018   | 0.002 | 9.30E-19  | 78.210   |
| rs34677431 | T | A | (0.023) | 0.002 | 9.10E-25  | 105.578  |
| rs34736275 | A | G | (0.014) | 0.002 | 3.20E-11  | 44.040   |
| rs34941271 | T | G | 0.082   | 0.011 | 2.10E-13  | 53.955   |
| rs34978408 | A | C | 0.021   | 0.003 | 7.00E-16  | 65.140   |
| rs34980052 | G | A | 0.020   | 0.002 | 2.10E-18  | 76.584   |
| rs35013380 | G | A | (0.012) | 0.002 | 4.50E-08  | 29.917   |

|             |   |   |         |       |           |          |
|-------------|---|---|---------|-------|-----------|----------|
| rs35150201  | G | T | (0.022) | 0.002 | 1.90E-26  | 113.257  |
| rs35188965  | T | C | (0.037) | 0.002 | 2.00E-71  | 319.380  |
| rs35258120  | A | G | (0.031) | 0.003 | 1.10E-31  | 137.212  |
| rs35404500  | T | A | 0.015   | 0.002 | 4.20E-10  | 39.025   |
| rs35825959  | A | T | (0.016) | 0.003 | 1.70E-08  | 31.772   |
| rs36083909  | A | G | (0.019) | 0.003 | 3.00E-09  | 35.208   |
| rs36186660  | A | G | 0.020   | 0.002 | 3.10E-23  | 98.582   |
| rs363064    | T | C | 0.027   | 0.002 | 7.20E-33  | 142.610  |
| rs3767809   | C | T | (0.043) | 0.002 | 2.00E-68  | 305.580  |
| rs3796008   | A | G | 0.021   | 0.002 | 1.60E-24  | 104.451  |
| rs3809547   | G | C | (0.024) | 0.002 | 6.30E-23  | 97.197   |
| rs3811604   | T | A | (0.024) | 0.004 | 3.00E-08  | 30.706   |
| rs3816086   | C | T | (0.015) | 0.002 | 2.50E-13  | 53.557   |
| rs3857175   | A | G | 0.024   | 0.002 | 3.60E-22  | 93.717   |
| rs3924236   | T | C | (0.034) | 0.002 | 7.30E-64  | 284.651  |
| rs41273668  | A | T | (0.037) | 0.006 | 2.30E-10  | 40.157   |
| rs4236051   | T | C | (0.231) | 0.011 | 5.20E-103 | 464.453  |
| rs4382936   | C | A | 0.013   | 0.002 | 2.70E-09  | 35.379   |
| rs442472    | T | C | (0.013) | 0.002 | 2.10E-08  | 31.355   |
| rs4460776   | A | C | 0.015   | 0.002 | 2.50E-13  | 53.550   |
| rs4496372   | T | C | (0.012) | 0.002 | 1.50E-08  | 32.032   |
| rs4538653   | C | G | 0.046   | 0.002 | 3.50E-95  | 428.482  |
| rs45510500  | T | C | 0.044   | 0.005 | 1.00E-22  | 96.185   |
| rs4639700   | T | C | (0.015) | 0.002 | 2.30E-11  | 44.726   |
| rs4700002   | A | T | (0.024) | 0.002 | 1.90E-28  | 122.359  |
| rs4711890   | G | C | (0.039) | 0.002 | 3.30E-63  | 281.648  |
| rs4746855   | A | G | (0.063) | 0.002 | 1.00E-200 | 916.621  |
| rs4786476   | A | G | 0.012   | 0.002 | 1.20E-08  | 32.455   |
| rs4814508   | C | T | 0.013   | 0.002 | 6.40E-11  | 42.705   |
| rs4824112   | G | A | (0.031) | 0.003 | 3.40E-33  | 144.115  |
| rs4849845   | A | G | 0.041   | 0.002 | 3.70E-76  | 341.060  |
| rs4871499   | G | T | 0.012   | 0.002 | 9.90E-09  | 32.870   |
| rs4909945   | C | T | (0.031) | 0.002 | 1.30E-44  | 196.334  |
| rs4921105   | G | A | 0.020   | 0.003 | 3.40E-11  | 43.913   |
| rs4926718   | G | A | 0.014   | 0.002 | 6.10E-09  | 33.804   |
| rs4941565   | G | T | (0.030) | 0.002 | 3.40E-44  | 194.467  |
| rs4950886   | A | G | (0.014) | 0.002 | 1.30E-11  | 45.855   |
| rs4952073   | C | T | (0.075) | 0.002 | 1.00E-200 | 1090.768 |
| rs4970966   | T | G | 0.016   | 0.002 | 1.40E-10  | 41.136   |
| rs4972699   | C | G | 0.038   | 0.005 | 6.10E-14  | 56.338   |
| rs4980840   | A | G | 0.015   | 0.003 | 9.40E-09  | 32.957   |
| rs504082    | T | G | (0.014) | 0.002 | 1.50E-09  | 36.477   |
| rs511141    | A | G | (0.013) | 0.002 | 2.80E-09  | 35.337   |
| rs530059793 | G | A | 0.125   | 0.011 | 2.30E-28  | 122.004  |
| rs531503    | C | T | 0.014   | 0.002 | 9.90E-11  | 41.833   |
| rs55709369  | A | G | 0.031   | 0.005 | 1.00E-10  | 41.812   |
| rs55844975  | C | T | (0.018) | 0.003 | 6.30E-10  | 38.232   |
| rs55874505  | G | T | 0.024   | 0.002 | 8.10E-30  | 128.642  |
| rs55903042  | A | G | 0.015   | 0.002 | 1.10E-10  | 41.563   |
| rs55905547  | G | A | (0.072) | 0.003 | 1.00E-163 | 743.572  |

|             |   |   |         |       |           |          |
|-------------|---|---|---------|-------|-----------|----------|
| rs56043070  | A | G | 0.120   | 0.004 | 4.70E-200 | 910.657  |
| rs56079926  | T | C | 0.017   | 0.002 | 1.20E-14  | 59.563   |
| rs56094005  | G | A | 0.062   | 0.005 | 1.10E-34  | 150.844  |
| rs56094988  | C | G | (0.022) | 0.004 | 1.60E-09  | 36.432   |
| rs56106611  | G | T | (0.240) | 0.008 | 4.00E-193 | 878.799  |
| rs56116444  | G | T | (0.032) | 0.004 | 2.00E-16  | 67.576   |
| rs56125990  | G | A | 0.022   | 0.003 | 3.90E-14  | 57.235   |
| rs56133113  | G | A | (0.039) | 0.003 | 3.70E-34  | 148.514  |
| rs56287412  | C | T | 0.017   | 0.002 | 8.00E-17  | 69.400   |
| rs56326157  | C | T | (0.025) | 0.003 | 3.70E-23  | 98.254   |
| rs56681946  | C | T | (0.017) | 0.002 | 5.00E-15  | 61.256   |
| rs5749169   | C | T | (0.019) | 0.003 | 2.00E-09  | 35.931   |
| rs5757946   | G | A | 0.014   | 0.002 | 2.20E-10  | 40.254   |
| rs57581963  | A | G | 0.016   | 0.002 | 3.30E-13  | 53.044   |
| rs5758910   | C | G | (0.032) | 0.002 | 1.80E-46  | 204.868  |
| rs577681458 | A | C | 0.066   | 0.004 | 8.90E-64  | 284.258  |
| rs57935882  | C | G | (0.042) | 0.004 | 4.10E-33  | 143.724  |
| rs583306    | T | C | (0.047) | 0.002 | 1.60E-90  | 407.099  |
| rs58761612  | A | G | (0.026) | 0.004 | 1.20E-11  | 46.023   |
| rs590820    | G | A | 0.013   | 0.002 | 4.90E-10  | 38.706   |
| rs594164    | C | A | (0.017) | 0.002 | 7.60E-16  | 64.971   |
| rs59508494  | G | A | 0.260   | 0.008 | 1.00E-200 | 1018.575 |
| rs6031849   | T | G | 0.029   | 0.002 | 3.40E-37  | 162.383  |
| rs603424    | A | G | (0.060) | 0.003 | 2.20E-107 | 484.509  |
| rs60371757  | A | T | (0.031) | 0.003 | 4.20E-30  | 129.943  |
| rs60408013  | C | T | 0.015   | 0.002 | 1.60E-12  | 49.877   |
| rs6045559   | T | C | (0.071) | 0.002 | 1.00E-200 | 1048.477 |
| rs6058375   | A | T | (0.020) | 0.003 | 9.00E-13  | 51.059   |
| rs6065      | T | C | (0.050) | 0.004 | 1.20E-37  | 164.537  |
| rs60695258  | T | C | (0.020) | 0.002 | 5.30E-22  | 92.982   |
| rs60757417  | G | C | 0.113   | 0.004 | 3.20E-148 | 672.295  |
| rs6081569   | C | G | 0.025   | 0.002 | 9.70E-32  | 137.438  |
| rs61009920  | A | C | (0.052) | 0.003 | 3.30E-67  | 299.970  |
| rs61269268  | C | A | (0.040) | 0.003 | 9.00E-49  | 215.416  |
| rs616008    | T | C | (0.013) | 0.002 | 1.30E-09  | 36.869   |
| rs61607560  | T | C | (0.034) | 0.003 | 1.40E-32  | 141.339  |
| rs61751937  | C | G | 0.055   | 0.006 | 1.70E-19  | 81.510   |
| rs61830291  | C | A | (0.029) | 0.003 | 1.50E-17  | 72.680   |
| rs61853632  | A | G | (0.080) | 0.006 | 3.30E-45  | 199.072  |
| rs61905108  | A | C | 0.028   | 0.005 | 6.70E-09  | 33.618   |
| rs62073988  | T | C | (0.033) | 0.003 | 2.70E-38  | 167.396  |
| rs62120075  | G | T | (0.028) | 0.004 | 6.40E-15  | 60.768   |
| rs62175230  | T | C | (0.018) | 0.002 | 7.40E-19  | 78.649   |
| rs62332261  | T | C | (0.014) | 0.003 | 2.60E-08  | 31.008   |
| rs62340877  | A | G | (0.022) | 0.003 | 6.20E-18  | 74.463   |
| rs62380762  | C | G | (0.021) | 0.002 | 5.80E-18  | 74.604   |
| rs62395851  | C | G | 0.072   | 0.004 | 9.70E-79  | 352.945  |
| rs62506682  | A | C | (0.019) | 0.003 | 1.20E-08  | 32.460   |
| rs62550975  | G | A | (0.033) | 0.004 | 8.40E-15  | 60.246   |
| rs6452819   | A | G | 0.047   | 0.007 | 8.40E-13  | 51.186   |

|            |   |   |         |       |           |         |
|------------|---|---|---------|-------|-----------|---------|
| rs6473306  | C | T | (0.013) | 0.002 | 2.00E-10  | 40.443  |
| rs6499129  | C | A | 0.034   | 0.003 | 1.90E-22  | 95.052  |
| rs6502738  | G | A | (0.024) | 0.002 | 8.60E-31  | 133.091 |
| rs6556405  | C | T | 0.067   | 0.002 | 1.90E-175 | 797.494 |
| rs6680258  | T | G | (0.021) | 0.002 | 1.80E-19  | 81.404  |
| rs6698842  | T | C | 0.013   | 0.002 | 5.40E-10  | 38.545  |
| rs6759839  | G | A | (0.035) | 0.002 | 3.10E-58  | 258.817 |
| rs6763024  | C | T | (0.017) | 0.002 | 2.40E-13  | 53.638  |
| rs6778454  | C | A | (0.021) | 0.002 | 6.10E-23  | 97.248  |
| rs67784641 | C | A | (0.021) | 0.003 | 4.00E-11  | 43.621  |
| rs67916705 | G | A | (0.014) | 0.002 | 8.40E-09  | 33.185  |
| rs6796     | C | T | (0.034) | 0.002 | 1.40E-49  | 219.172 |
| rs680210   | C | T | 0.025   | 0.002 | 1.50E-31  | 136.601 |
| rs6805034  | G | C | (0.026) | 0.002 | 6.00E-27  | 115.538 |
| rs68066031 | C | T | (0.030) | 0.002 | 4.90E-35  | 152.513 |
| rs6808932  | C | A | 0.022   | 0.002 | 4.30E-26  | 111.615 |
| rs6836941  | C | T | (0.083) | 0.003 | 1.00E-200 | 928.884 |
| rs6850636  | A | G | 0.019   | 0.003 | 3.80E-13  | 52.741  |
| rs6869332  | G | A | (0.048) | 0.003 | 9.80E-73  | 325.379 |
| rs688167   | G | C | 0.018   | 0.002 | 8.00E-16  | 64.862  |
| rs6899047  | C | G | 0.036   | 0.005 | 2.90E-11  | 44.225  |
| rs690686   | T | C | (0.032) | 0.004 | 8.30E-19  | 78.424  |
| rs6915030  | C | T | (0.024) | 0.003 | 6.40E-13  | 51.734  |
| rs6985353  | A | G | 0.027   | 0.002 | 7.80E-39  | 169.894 |
| rs6993770  | T | A | 0.045   | 0.002 | 1.30E-87  | 393.706 |
| rs7022807  | G | A | (0.019) | 0.002 | 9.00E-20  | 82.821  |
| rs7042161  | C | T | (0.014) | 0.002 | 3.70E-11  | 43.750  |
| rs7150606  | T | G | 0.030   | 0.003 | 9.30E-24  | 100.977 |
| rs7258141  | T | A | 0.024   | 0.002 | 1.40E-26  | 113.827 |
| rs72668171 | A | G | (0.024) | 0.003 | 1.20E-18  | 77.716  |
| rs72687006 | C | T | (0.092) | 0.008 | 5.20E-29  | 124.966 |
| rs72691294 | A | G | 0.055   | 0.004 | 6.30E-38  | 165.735 |
| rs72716340 | C | G | 0.017   | 0.003 | 3.50E-09  | 34.858  |
| rs72749964 | A | G | (0.016) | 0.003 | 2.20E-09  | 35.786  |
| rs72761071 | G | C | 0.129   | 0.007 | 3.20E-75  | 336.776 |
| rs72793380 | A | C | (0.025) | 0.003 | 3.80E-13  | 52.747  |
| rs72803369 | G | C | 0.037   | 0.005 | 1.40E-12  | 50.172  |
| rs72847536 | A | G | 0.068   | 0.006 | 3.30E-30  | 130.456 |
| rs73000929 | A | G | 0.095   | 0.005 | 5.80E-68  | 303.464 |
| rs7311196  | G | A | 0.061   | 0.003 | 2.10E-76  | 342.205 |
| rs73112592 | C | G | 0.076   | 0.007 | 7.90E-30  | 128.688 |
| rs73165962 | A | G | 0.030   | 0.003 | 4.80E-24  | 102.279 |
| rs73184272 | G | T | 0.084   | 0.008 | 3.90E-27  | 116.380 |
| rs73186292 | G | A | (0.049) | 0.008 | 4.00E-10  | 39.118  |
| rs73289314 | T | C | 0.059   | 0.008 | 6.90E-14  | 56.092  |
| rs7349311  | A | G | 0.038   | 0.003 | 1.00E-45  | 201.406 |
| rs73723358 | G | A | (0.068) | 0.003 | 5.00E-100 | 450.730 |
| rs74124004 | A | G | 0.041   | 0.003 | 6.30E-35  | 152.002 |
| rs741887   | A | G | (0.013) | 0.002 | 6.40E-10  | 38.180  |
| rs744233   | A | G | 0.015   | 0.002 | 3.80E-11  | 43.694  |

|            |   |   |         |       |           |          |
|------------|---|---|---------|-------|-----------|----------|
| rs74914371 | C | T | 0.035   | 0.006 | 1.40E-08  | 32.143   |
| rs74950833 | C | G | (0.065) | 0.008 | 1.30E-15  | 63.905   |
| rs75068943 | G | A | (0.083) | 0.004 | 2.80E-111 | 502.444  |
| rs754179   | T | C | 0.014   | 0.002 | 3.10E-10  | 39.600   |
| rs75457925 | G | A | 0.034   | 0.006 | 1.20E-09  | 36.915   |
| rs7563723  | C | T | 0.021   | 0.002 | 3.30E-22  | 93.901   |
| rs75699653 | T | C | 0.071   | 0.007 | 2.50E-26  | 112.690  |
| rs7585866  | G | A | (0.038) | 0.002 | 8.90E-70  | 311.788  |
| rs7586747  | A | G | 0.013   | 0.002 | 1.30E-09  | 36.852   |
| rs7608716  | T | A | 0.020   | 0.003 | 1.40E-09  | 36.725   |
| rs76091143 | A | C | (0.034) | 0.006 | 1.70E-08  | 31.816   |
| rs76109311 | G | A | 0.015   | 0.002 | 4.50E-13  | 52.397   |
| rs7618405  | A | C | 0.034   | 0.003 | 5.40E-41  | 179.789  |
| rs7632444  | C | T | 0.018   | 0.003 | 3.80E-11  | 43.736   |
| rs7638633  | C | T | (0.039) | 0.002 | 7.70E-65  | 289.137  |
| rs7639048  | G | A | (0.021) | 0.002 | 1.30E-25  | 109.370  |
| rs76452111 | T | A | 0.090   | 0.005 | 1.40E-70  | 315.501  |
| rs76900683 | C | G | (0.051) | 0.005 | 9.60E-27  | 114.600  |
| rs7710854  | G | A | 0.024   | 0.003 | 1.60E-13  | 54.408   |
| rs7712401  | T | C | 0.023   | 0.002 | 8.40E-29  | 123.999  |
| rs7720336  | G | A | (0.025) | 0.004 | 1.00E-11  | 46.327   |
| rs7726369  | C | G | 0.030   | 0.004 | 1.70E-16  | 67.947   |
| rs77373975 | C | T | 0.182   | 0.005 | 1.00E-200 | 1422.639 |
| rs77585733 | G | A | 0.022   | 0.004 | 2.30E-08  | 31.230   |
| rs7775219  | T | C | (0.018) | 0.003 | 6.70E-10  | 38.107   |
| rs77808283 | A | G | (0.058) | 0.005 | 4.80E-27  | 115.978  |
| rs7786376  | G | A | 0.016   | 0.002 | 2.30E-12  | 49.217   |
| rs7792825  | C | T | (0.013) | 0.002 | 8.20E-09  | 33.217   |
| rs7808005  | T | C | 0.030   | 0.002 | 5.40E-40  | 175.211  |
| rs78107380 | A | C | 0.041   | 0.006 | 7.60E-12  | 46.874   |
| rs7830416  | A | T | (0.023) | 0.003 | 1.70E-14  | 58.813   |
| rs78436760 | C | T | 0.096   | 0.002 | 1.00E-200 | 2277.601 |
| rs7914782  | G | A | 0.016   | 0.002 | 5.50E-15  | 61.076   |
| rs79411242 | T | C | 0.021   | 0.004 | 2.70E-08  | 30.928   |
| rs7949566  | A | G | 0.036   | 0.002 | 2.60E-69  | 309.645  |
| rs79716587 | A | G | 0.038   | 0.003 | 1.90E-34  | 149.854  |
| rs79744378 | T | G | (0.152) | 0.007 | 3.20E-104 | 470.029  |
| rs79749090 | G | A | (0.036) | 0.004 | 5.70E-20  | 83.720   |
| rs7975687  | C | T | (0.024) | 0.002 | 4.60E-32  | 138.912  |
| rs79762299 | T | A | 0.101   | 0.003 | 1.00E-200 | 1336.970 |
| rs79847479 | A | C | 0.069   | 0.004 | 3.80E-66  | 295.126  |
| rs80016599 | T | G | 0.079   | 0.011 | 2.60E-13  | 53.500   |
| rs80026440 | G | C | (0.033) | 0.006 | 3.60E-08  | 30.381   |
| rs8038177  | T | A | (0.013) | 0.002 | 9.10E-10  | 37.506   |
| rs8106212  | T | C | 0.136   | 0.010 | 2.00E-45  | 200.047  |
| rs8115191  | T | C | (0.024) | 0.002 | 2.90E-31  | 135.262  |
| rs817324   | A | G | (0.015) | 0.002 | 2.10E-09  | 35.878   |
| rs826426   | A | G | 0.018   | 0.003 | 1.30E-08  | 32.269   |
| rs869487   | G | C | 0.015   | 0.002 | 5.60E-09  | 33.965   |
| rs881399   | C | T | 0.036   | 0.003 | 1.40E-37  | 164.121  |

|            |   |   |         |       |           |          |
|------------|---|---|---------|-------|-----------|----------|
| rs920748   | C | T | (0.050) | 0.005 | 9.50E-22  | 91.822   |
| rs9311171  | G | T | 0.016   | 0.003 | 7.40E-09  | 33.431   |
| rs9320278  | C | T | (0.015) | 0.002 | 1.40E-12  | 50.155   |
| rs9386889  | T | C | 0.013   | 0.002 | 1.30E-09  | 36.802   |
| rs939136   | C | G | (0.026) | 0.002 | 3.10E-34  | 148.834  |
| rs9425824  | A | G | 0.091   | 0.003 | 1.00E-200 | 987.777  |
| rs9426262  | G | T | (0.016) | 0.002 | 4.10E-12  | 48.082   |
| rs944002   | G | A | (0.076) | 0.002 | 1.00E-200 | 1023.838 |
| rs9543534  | T | C | 0.019   | 0.002 | 1.00E-16  | 68.945   |
| rs9549753  | A | C | 0.046   | 0.002 | 6.40E-111 | 500.785  |
| rs9573565  | T | C | 0.019   | 0.002 | 2.20E-15  | 62.856   |
| rs9577481  | A | G | 0.025   | 0.003 | 2.10E-20  | 85.702   |
| rs9583151  | C | T | 0.015   | 0.002 | 6.60E-13  | 51.656   |
| rs9595404  | T | C | 0.012   | 0.002 | 3.70E-08  | 30.321   |
| rs9616908  | G | A | (0.029) | 0.002 | 3.30E-43  | 189.950  |
| rs968042   | A | G | (0.024) | 0.002 | 1.60E-28  | 122.749  |
| rs972577   | T | C | 0.059   | 0.002 | 2.80E-179 | 815.138  |
| rs9729409  | G | A | 0.021   | 0.002 | 6.30E-20  | 83.527   |
| rs9736609  | A | G | (0.103) | 0.003 | 1.00E-200 | 1366.054 |
| rs9833022  | T | C | (0.050) | 0.008 | 4.50E-10  | 38.887   |
| rs9846396  | T | C | (0.016) | 0.002 | 7.30E-15  | 60.524   |
| rs9874738  | T | G | 0.016   | 0.002 | 1.20E-11  | 46.018   |
| rs9894399  | C | A | 0.025   | 0.004 | 8.10E-11  | 42.227   |
| rs9894993  | C | T | 0.016   | 0.002 | 3.90E-14  | 57.198   |
| rs9902260  | T | C | (0.027) | 0.002 | 5.50E-40  | 175.184  |
| rs9926137  | C | G | 0.026   | 0.003 | 1.60E-22  | 95.289   |
| rs993284   | G | C | 0.018   | 0.003 | 2.30E-12  | 49.195   |
| rs9937661  | C | T | 0.033   | 0.002 | 2.60E-55  | 245.415  |
| rs9974653  | C | A | 0.017   | 0.002 | 9.60E-15  | 59.973   |
| rs10047928 | A | G | 0.029   | 0.002 | 1.80E-35  | 154.496  |
| rs10048745 | A | G | 0.014   | 0.002 | 3.90E-09  | 34.682   |
| rs10113898 | G | A | (0.013) | 0.002 | 1.10E-09  | 37.087   |
| rs10212636 | C | T | 0.021   | 0.002 | 6.30E-19  | 78.962   |
| rs10237268 | C | A | (0.021) | 0.004 | 2.20E-08  | 31.283   |
| rs10418205 | G | A | 0.020   | 0.002 | 5.30E-21  | 88.403   |
| rs10459246 | T | G | (0.067) | 0.002 | 1.00E-200 | 1027.431 |
| rs1047891  | A | C | 0.030   | 0.002 | 3.50E-43  | 189.829  |
| rs10506015 | C | G | (0.016) | 0.003 | 7.30E-10  | 37.943   |
| rs1059196  | T | C | 0.049   | 0.002 | 1.50E-93  | 420.949  |
| rs10777748 | G | T | (0.013) | 0.002 | 4.30E-08  | 29.992   |
| rs10813766 | G | T | (0.055) | 0.002 | 1.20E-141 | 641.964  |
| rs10820606 | C | A | (0.034) | 0.002 | 1.80E-43  | 191.149  |
| rs10844279 | G | T | (0.052) | 0.003 | 5.60E-71  | 317.309  |
| rs10886437 | T | C | 0.035   | 0.003 | 7.40E-39  | 170.012  |
| rs10894020 | C | T | (0.014) | 0.002 | 1.20E-10  | 41.442   |
| rs10896024 | G | A | (0.031) | 0.002 | 2.60E-49  | 217.880  |
| rs10940072 | A | G | 0.022   | 0.002 | 3.00E-26  | 112.329  |
| rs10947613 | A | G | (0.017) | 0.002 | 3.60E-14  | 57.383   |
| rs10961948 | C | T | (0.016) | 0.003 | 1.40E-08  | 32.240   |
| rs10970979 | G | A | 0.045   | 0.002 | 4.10E-90  | 405.205  |

|             |   |   |         |       |           |          |
|-------------|---|---|---------|-------|-----------|----------|
| rs11071720  | C | T | (0.058) | 0.002 | 1.50E-148 | 673.809  |
| rs11072496  | T | C | 0.026   | 0.003 | 7.80E-20  | 83.107   |
| rs11075750  | G | A | (0.020) | 0.002 | 3.90E-20  | 84.471   |
| rs11078288  | G | A | (0.056) | 0.009 | 1.90E-10  | 40.557   |
| rs11082304  | T | G | 0.045   | 0.002 | 5.70E-107 | 482.630  |
| rs11083766  | C | T | 0.068   | 0.002 | 1.00E-200 | 981.616  |
| rs11121012  | G | A | (0.031) | 0.002 | 1.50E-46  | 205.257  |
| rs11121529  | G | C | 0.082   | 0.003 | 4.30E-144 | 653.292  |
| rs11128264  | T | C | (0.013) | 0.002 | 4.90E-10  | 38.733   |
| rs111592250 | A | G | 0.020   | 0.003 | 3.40E-10  | 39.421   |
| rs11168257  | G | A | (0.018) | 0.002 | 1.90E-15  | 63.157   |
| rs11186859  | G | C | 0.013   | 0.002 | 6.00E-09  | 33.819   |
| rs11195945  | T | C | 0.054   | 0.003 | 2.20E-64  | 286.997  |
| rs112100699 | T | C | 0.015   | 0.003 | 2.40E-08  | 31.172   |
| rs1122234   | T | C | 0.059   | 0.008 | 1.20E-14  | 59.499   |
| rs11229075  | C | A | (0.030) | 0.002 | 6.30E-38  | 165.756  |
| rs11240341  | C | T | (0.073) | 0.002 | 1.00E-200 | 1133.704 |
| rs112467797 | G | A | (0.063) | 0.008 | 3.60E-14  | 57.372   |
| rs11247735  | A | G | (0.013) | 0.002 | 1.20E-10  | 41.439   |
| rs1126643   | T | C | (0.012) | 0.002 | 7.80E-09  | 33.331   |
| rs112744251 | T | C | (0.028) | 0.004 | 4.90E-11  | 43.212   |
| rs113848517 | G | A | (0.081) | 0.005 | 4.70E-51  | 225.876  |
| rs114427647 | T | C | 0.065   | 0.005 | 1.80E-38  | 168.192  |
| rs114694170 | C | T | (0.140) | 0.004 | 1.00E-200 | 1018.988 |
| rs114968084 | A | G | 0.086   | 0.006 | 2.60E-42  | 185.807  |
| rs115060008 | C | A | (0.019) | 0.004 | 4.60E-08  | 29.862   |
| rs115770471 | T | A | (0.067) | 0.010 | 1.60E-11  | 45.373   |
| rs1158569   | C | A | (0.041) | 0.002 | 3.70E-87  | 391.589  |
| rs11585858  | A | C | (0.026) | 0.002 | 1.60E-26  | 113.568  |
| rs11585973  | G | A | 0.028   | 0.003 | 1.80E-23  | 99.707   |
| rs11627032  | C | T | (0.018) | 0.002 | 1.00E-14  | 59.809   |
| rs11663341  | A | T | 0.015   | 0.002 | 6.30E-10  | 38.233   |
| rs116735454 | C | T | (0.136) | 0.006 | 4.60E-124 | 561.189  |
| rs11681966  | A | C | 0.022   | 0.002 | 5.10E-25  | 106.732  |
| rs11702425  | C | T | (0.014) | 0.002 | 2.70E-10  | 39.912   |
| rs11711320  | T | C | 0.020   | 0.002 | 1.20E-16  | 68.603   |
| rs11712455  | G | A | 0.057   | 0.005 | 2.60E-34  | 149.201  |
| rs117128711 | T | C | (0.052) | 0.006 | 2.70E-19  | 80.621   |
| rs11714248  | A | G | (0.014) | 0.002 | 8.30E-12  | 46.696   |
| rs117173117 | A | T | (0.027) | 0.004 | 1.00E-10  | 41.748   |
| rs117395928 | T | C | (0.076) | 0.010 | 3.50E-14  | 57.420   |
| rs11756806  | T | C | 0.041   | 0.003 | 7.30E-35  | 151.723  |
| rs117625066 | A | G | 0.016   | 0.003 | 1.40E-09  | 36.639   |
| rs11765436  | A | T | (0.015) | 0.002 | 2.30E-12  | 49.194   |
| rs11775560  | G | A | 0.017   | 0.003 | 1.50E-10  | 41.065   |
| rs118001372 | T | C | 0.034   | 0.004 | 1.50E-14  | 59.058   |
| rs118033845 | A | G | 0.068   | 0.006 | 1.00E-32  | 141.893  |
| rs118062113 | A | T | 0.067   | 0.010 | 2.60E-12  | 48.971   |
| rs118170190 | T | C | 0.040   | 0.005 | 9.90E-15  | 59.913   |
| rs11894682  | G | T | (0.106) | 0.005 | 5.11E-107 | 482.876  |

|             |   |   |         |       |           |          |
|-------------|---|---|---------|-------|-----------|----------|
| rs11898764  | T | C | (0.025) | 0.002 | 3.00E-27  | 116.935  |
| rs11936046  | A | G | 0.013   | 0.002 | 2.80E-10  | 39.827   |
| rs11993233  | G | A | (0.031) | 0.002 | 3.40E-49  | 217.389  |
| rs12033187  | T | C | (0.016) | 0.002 | 1.80E-14  | 58.767   |
| rs12041331  | A | G | (0.081) | 0.004 | 8.00E-109 | 491.147  |
| rs12063500  | T | C | 0.046   | 0.004 | 1.80E-29  | 127.072  |
| rs12118065  | A | G | 0.067   | 0.002 | 1.00E-200 | 1045.237 |
| rs12121085  | T | G | (0.011) | 0.002 | 3.40E-08  | 30.482   |
| rs1217414   | A | G | 0.013   | 0.002 | 7.30E-09  | 33.444   |
| rs12217146  | A | G | 0.034   | 0.006 | 3.50E-09  | 34.871   |
| rs12231498  | T | C | 0.065   | 0.002 | 1.00E-200 | 934.029  |
| rs12418931  | A | C | (0.016) | 0.002 | 8.10E-14  | 55.771   |
| rs12426629  | G | C | (0.035) | 0.005 | 1.30E-11  | 45.744   |
| rs12445050  | T | C | 0.055   | 0.003 | 1.20E-74  | 334.218  |
| rs12454829  | A | C | 0.039   | 0.003 | 6.40E-37  | 161.119  |
| rs12465143  | T | C | (0.125) | 0.003 | 1.00E-200 | 1372.945 |
| rs12515523  | A | G | 0.033   | 0.003 | 9.70E-30  | 128.284  |
| rs1255263   | C | G | (0.024) | 0.003 | 8.80E-19  | 78.305   |
| rs12593477  | T | A | 0.021   | 0.003 | 1.70E-12  | 49.769   |
| rs12625404  | T | C | 0.024   | 0.002 | 1.80E-30  | 131.645  |
| rs12637288  | A | G | 0.017   | 0.002 | 2.80E-17  | 71.508   |
| rs12666411  | A | C | (0.043) | 0.004 | 2.10E-30  | 131.326  |
| rs12684581  | G | T | (0.015) | 0.002 | 1.60E-11  | 45.432   |
| rs12827036  | T | G | 0.095   | 0.002 | 1.00E-200 | 2226.299 |
| rs12935775  | A | G | (0.020) | 0.002 | 7.00E-21  | 87.865   |
| rs12940204  | T | C | 0.018   | 0.002 | 5.60E-18  | 74.668   |
| rs12979144  | A | G | 0.022   | 0.002 | 2.90E-25  | 107.840  |
| rs13098005  | T | C | (0.039) | 0.003 | 2.20E-55  | 245.781  |
| rs13224082  | T | A | 0.029   | 0.002 | 7.40E-34  | 147.129  |
| rs13231886  | A | G | (0.018) | 0.002 | 2.20E-18  | 76.513   |
| rs13233747  | A | G | (0.023) | 0.002 | 1.80E-27  | 117.948  |
| rs13257521  | G | C | 0.021   | 0.003 | 5.70E-16  | 65.544   |
| rs13257813  | A | G | (0.023) | 0.002 | 4.50E-25  | 106.987  |
| rs13266369  | G | T | (0.012) | 0.002 | 2.70E-08  | 30.887   |
| rs1328599   | T | G | 0.046   | 0.004 | 1.10E-32  | 141.797  |
| rs13314114  | C | T | 0.044   | 0.002 | 7.80E-102 | 459.040  |
| rs1332835   | T | G | (0.014) | 0.002 | 1.30E-09  | 36.835   |
| rs1354036   | C | T | (0.085) | 0.002 | 1.00E-200 | 1564.736 |
| rs1369236   | G | A | (0.050) | 0.004 | 1.30E-43  | 191.759  |
| rs1385452   | T | G | (0.012) | 0.002 | 1.80E-08  | 31.722   |
| rs138606434 | T | C | 0.051   | 0.006 | 1.90E-18  | 76.751   |
| rs138881192 | A | G | (0.043) | 0.007 | 6.10E-09  | 33.806   |
| rs141492190 | G | A | 0.069   | 0.008 | 3.90E-19  | 79.933   |
| rs1429271   | C | T | 0.024   | 0.003 | 3.10E-14  | 57.656   |
| rs144597972 | T | G | 0.061   | 0.006 | 2.20E-23  | 99.235   |
| rs145175283 | A | G | (0.040) | 0.007 | 3.70E-08  | 30.305   |
| rs146281383 | T | C | (0.038) | 0.006 | 8.90E-10  | 37.553   |
| rs146818600 | T | C | (0.038) | 0.004 | 4.50E-21  | 88.748   |
| rs147583009 | T | C | (0.222) | 0.011 | 2.60E-98  | 442.866  |
| rs1476096   | C | A | (0.027) | 0.002 | 1.70E-39  | 172.933  |

|             |   |   |         |       |           |          |
|-------------|---|---|---------|-------|-----------|----------|
| rs147837849 | C | T | 0.053   | 0.009 | 9.50E-09  | 32.935   |
| rs147886588 | G | C | 0.026   | 0.003 | 7.20E-21  | 87.812   |
| rs148578645 | T | C | (0.052) | 0.006 | 9.10E-16  | 64.626   |
| rs148641669 | T | C | 0.019   | 0.003 | 9.90E-09  | 32.855   |
| rs149039920 | A | G | 0.130   | 0.009 | 1.90E-51  | 227.721  |
| rs149511257 | A | G | 0.091   | 0.012 | 1.00E-14  | 59.900   |
| rs150704300 | G | A | (0.072) | 0.007 | 1.20E-24  | 105.038  |
| rs151234    | C | G | (0.063) | 0.003 | 1.20E-95  | 430.566  |
| rs1518991   | T | C | (0.019) | 0.002 | 1.30E-20  | 86.601   |
| rs1550638   | T | C | (0.019) | 0.003 | 2.10E-11  | 44.870   |
| rs156355    | C | T | 0.060   | 0.002 | 2.50E-175 | 796.935  |
| rs1569419   | C | T | 0.030   | 0.002 | 3.60E-34  | 148.560  |
| rs1635291   | A | G | 0.030   | 0.002 | 1.10E-35  | 155.494  |
| rs1647385   | A | G | (0.033) | 0.003 | 8.70E-35  | 151.373  |
| rs1654425   | C | T | 0.058   | 0.003 | 1.00E-96  | 435.556  |
| rs1664485   | T | A | (0.063) | 0.008 | 2.00E-14  | 58.565   |
| rs16853239  | C | T | 0.038   | 0.004 | 2.10E-22  | 94.799   |
| rs16854980  | C | T | (0.130) | 0.007 | 2.30E-73  | 328.293  |
| rs16918645  | G | A | 0.054   | 0.004 | 1.40E-35  | 154.983  |
| rs16982339  | G | A | (0.021) | 0.003 | 1.20E-15  | 63.993   |
| rs17037388  | G | A | 0.021   | 0.003 | 5.60E-14  | 56.517   |
| rs17068850  | G | A | (0.028) | 0.003 | 1.80E-26  | 113.398  |
| rs17225878  | G | A | 0.118   | 0.003 | 1.00E-200 | 1951.973 |
| rs17231282  | T | C | (0.048) | 0.007 | 9.80E-13  | 50.880   |
| rs17256211  | G | A | 0.016   | 0.002 | 4.50E-14  | 56.949   |
| rs1736150   | A | G | (0.019) | 0.002 | 2.00E-19  | 81.288   |
| rs17382379  | G | A | 0.014   | 0.002 | 5.60E-10  | 38.440   |
| rs174544    | A | C | (0.050) | 0.002 | 2.10E-112 | 507.594  |
| rs17572109  | A | G | (0.037) | 0.002 | 9.60E-53  | 233.628  |
| rs17581728  | T | C | 0.020   | 0.002 | 2.00E-16  | 67.635   |
| rs17593311  | C | G | 0.044   | 0.007 | 3.10E-09  | 35.112   |
| rs17726337  | C | G | (0.087) | 0.005 | 1.10E-56  | 251.651  |
| rs17758695  | T | C | (0.083) | 0.006 | 2.10E-42  | 186.278  |
| rs17853159  | A | G | (0.044) | 0.004 | 5.60E-32  | 138.517  |
| rs1788234   | T | C | (0.064) | 0.002 | 1.00E-200 | 917.519  |
| rs1795964   | G | A | 0.072   | 0.002 | 1.00E-200 | 1111.959 |
| rs182120    | C | A | (0.016) | 0.002 | 5.70E-12  | 47.444   |
| rs184885436 | T | C | (0.081) | 0.009 | 9.90E-18  | 73.525   |
| rs1883258   | T | G | 0.038   | 0.002 | 3.70E-73  | 327.320  |
| rs190712219 | A | G | (0.090) | 0.008 | 1.70E-26  | 113.482  |
| rs1981150   | T | C | (0.027) | 0.003 | 6.40E-17  | 69.847   |
| rs2005277   | C | T | (0.012) | 0.002 | 3.50E-09  | 34.868   |
| rs200838    | C | A | (0.042) | 0.002 | 1.00E-93  | 421.762  |
| rs2014511   | A | G | (0.072) | 0.006 | 6.80E-36  | 156.431  |
| rs203417    | C | T | 0.026   | 0.004 | 1.30E-09  | 36.780   |
| rs203482    | A | G | (0.030) | 0.002 | 4.70E-48  | 212.147  |
| rs2048084   | T | G | 0.016   | 0.002 | 1.40E-14  | 59.187   |
| rs2051105   | A | G | (0.017) | 0.002 | 5.40E-16  | 65.641   |
| rs2057149   | T | C | (0.035) | 0.002 | 3.50E-58  | 258.600  |
| rs2075511   | C | A | (0.011) | 0.002 | 2.40E-08  | 31.108   |

|            |   |   |         |       |           |          |
|------------|---|---|---------|-------|-----------|----------|
| rs2079356  | T | C | (0.103) | 0.002 | 1.00E-200 | 2283.150 |
| rs2157770  | G | A | (0.043) | 0.002 | 2.10E-80  | 360.588  |
| rs2233713  | C | A | (0.014) | 0.002 | 3.00E-11  | 44.159   |
| rs2244700  | G | A | (0.029) | 0.002 | 1.20E-44  | 196.574  |
| rs2268015  | C | T | (0.021) | 0.002 | 2.80E-24  | 103.352  |
| rs2279965  | G | A | (0.020) | 0.002 | 7.00E-19  | 78.772   |
| rs2299979  | T | A | (0.030) | 0.004 | 2.30E-15  | 62.805   |
| rs2304281  | A | G | (0.018) | 0.003 | 4.60E-12  | 47.833   |
| rs2305758  | T | C | 0.023   | 0.002 | 8.20E-25  | 105.799  |
| rs234108   | A | G | 0.016   | 0.002 | 2.80E-14  | 57.845   |
| rs2412653  | A | G | 0.023   | 0.003 | 2.00E-12  | 49.480   |
| rs2422442  | A | C | (0.016) | 0.002 | 4.50E-12  | 47.896   |
| rs2427866  | A | G | 0.012   | 0.002 | 2.00E-08  | 31.499   |
| rs246454   | A | C | 0.014   | 0.002 | 4.90E-11  | 43.230   |
| rs2505084  | A | G | (0.011) | 0.002 | 4.80E-08  | 29.785   |
| rs2516471  | A | G | (0.125) | 0.004 | 1.30E-186 | 848.877  |
| rs2526833  | G | A | 0.012   | 0.002 | 5.60E-09  | 33.958   |
| rs2577627  | G | T | 0.020   | 0.002 | 1.50E-21  | 90.969   |
| rs2594950  | C | G | (0.013) | 0.002 | 1.50E-09  | 36.489   |
| rs2605492  | A | C | (0.066) | 0.002 | 1.00E-200 | 1046.153 |
| rs2639793  | G | A | 0.022   | 0.003 | 4.00E-18  | 75.334   |
| rs2659582  | A | G | 0.016   | 0.002 | 9.50E-14  | 55.473   |
| rs2691475  | A | G | 0.020   | 0.002 | 8.90E-21  | 87.391   |
| rs2709865  | C | T | 0.070   | 0.004 | 3.00E-58  | 258.854  |
| rs2723242  | G | A | 0.017   | 0.002 | 1.40E-12  | 50.202   |
| rs2723261  | T | C | 0.017   | 0.002 | 5.90E-15  | 60.923   |
| rs2730347  | T | A | (0.019) | 0.003 | 6.70E-09  | 33.615   |
| rs2789422  | A | G | 0.030   | 0.002 | 3.10E-47  | 208.361  |
| rs2794868  | G | A | (0.052) | 0.006 | 4.60E-18  | 75.056   |
| rs2800446  | A | T | (0.024) | 0.003 | 2.70E-18  | 76.087   |
| rs2834735  | C | T | (0.014) | 0.002 | 1.60E-10  | 40.900   |
| rs28396651 | G | A | 0.032   | 0.002 | 4.40E-53  | 235.207  |
| rs28507876 | G | A | (0.025) | 0.002 | 3.20E-24  | 103.116  |
| rs2856650  | A | G | 0.019   | 0.002 | 1.80E-17  | 72.371   |
| rs2857464  | C | A | 0.031   | 0.002 | 1.60E-35  | 154.721  |
| rs28594922 | G | A | (0.018) | 0.002 | 1.70E-14  | 58.813   |
| rs28681431 | A | G | 0.022   | 0.003 | 1.90E-18  | 76.778   |
| rs287899   | T | C | (0.013) | 0.002 | 9.50E-09  | 32.945   |
| rs293570   | G | A | (0.015) | 0.002 | 6.10E-11  | 42.779   |
| rs2966431  | A | G | (0.021) | 0.003 | 1.70E-10  | 40.737   |
| rs3013439  | G | T | 0.024   | 0.002 | 3.30E-33  | 144.132  |
| rs34036230 | A | C | 0.027   | 0.003 | 2.20E-17  | 71.969   |
| rs34110295 | G | A | (0.019) | 0.003 | 7.90E-14  | 55.842   |
| rs34346558 | C | A | (0.035) | 0.003 | 1.00E-42  | 187.645  |
| rs34350312 | A | T | 0.031   | 0.003 | 2.20E-31  | 135.803  |
| rs34415062 | A | G | (0.024) | 0.003 | 3.90E-19  | 79.900   |
| rs34426467 | A | T | 0.018   | 0.002 | 9.30E-19  | 78.210   |
| rs34677431 | T | A | (0.023) | 0.002 | 9.10E-25  | 105.578  |
| rs34736275 | A | G | (0.014) | 0.002 | 3.20E-11  | 44.040   |
| rs34941271 | T | G | 0.082   | 0.011 | 2.10E-13  | 53.955   |

|             |   |   |         |       |           |          |
|-------------|---|---|---------|-------|-----------|----------|
| rs34978408  | A | C | 0.021   | 0.003 | 7.00E-16  | 65.140   |
| rs34980052  | G | A | 0.020   | 0.002 | 2.10E-18  | 76.584   |
| rs35013380  | G | A | (0.012) | 0.002 | 4.50E-08  | 29.917   |
| rs35150201  | G | T | (0.022) | 0.002 | 1.90E-26  | 113.257  |
| rs35188965  | T | C | (0.037) | 0.002 | 2.00E-71  | 319.380  |
| rs35258120  | A | G | (0.031) | 0.003 | 1.10E-31  | 137.212  |
| rs35404500  | T | A | 0.015   | 0.002 | 4.20E-10  | 39.025   |
| rs35825959  | A | T | (0.016) | 0.003 | 1.70E-08  | 31.772   |
| rs36083909  | A | G | (0.019) | 0.003 | 3.00E-09  | 35.208   |
| rs36186660  | A | G | 0.020   | 0.002 | 3.10E-23  | 98.582   |
| rs363064    | T | C | 0.027   | 0.002 | 7.20E-33  | 142.610  |
| rs3767809   | C | T | (0.043) | 0.002 | 2.00E-68  | 305.580  |
| rs3796008   | A | G | 0.021   | 0.002 | 1.60E-24  | 104.451  |
| rs3809547   | G | C | (0.024) | 0.002 | 6.30E-23  | 97.197   |
| rs3811604   | T | A | (0.024) | 0.004 | 3.00E-08  | 30.706   |
| rs3816086   | C | T | (0.015) | 0.002 | 2.50E-13  | 53.557   |
| rs3857175   | A | G | 0.024   | 0.002 | 3.60E-22  | 93.717   |
| rs3924236   | T | C | (0.034) | 0.002 | 7.30E-64  | 284.651  |
| rs41273668  | A | T | (0.037) | 0.006 | 2.30E-10  | 40.157   |
| rs4236051   | T | C | (0.231) | 0.011 | 5.20E-103 | 464.453  |
| rs4382936   | C | A | 0.013   | 0.002 | 2.70E-09  | 35.379   |
| rs442472    | T | C | (0.013) | 0.002 | 2.10E-08  | 31.355   |
| rs4460776   | A | C | 0.015   | 0.002 | 2.50E-13  | 53.550   |
| rs4496372   | T | C | (0.012) | 0.002 | 1.50E-08  | 32.032   |
| rs4538653   | C | G | 0.046   | 0.002 | 3.50E-95  | 428.482  |
| rs45510500  | T | C | 0.044   | 0.005 | 1.00E-22  | 96.185   |
| rs4639700   | T | C | (0.015) | 0.002 | 2.30E-11  | 44.726   |
| rs4700002   | A | T | (0.024) | 0.002 | 1.90E-28  | 122.359  |
| rs4711890   | G | C | (0.039) | 0.002 | 3.30E-63  | 281.648  |
| rs4746855   | A | G | (0.063) | 0.002 | 1.00E-200 | 916.621  |
| rs4786476   | A | G | 0.012   | 0.002 | 1.20E-08  | 32.455   |
| rs4814508   | C | T | 0.013   | 0.002 | 6.40E-11  | 42.705   |
| rs4824112   | G | A | (0.031) | 0.003 | 3.40E-33  | 144.115  |
| rs4849845   | A | G | 0.041   | 0.002 | 3.70E-76  | 341.060  |
| rs4871499   | G | T | 0.012   | 0.002 | 9.90E-09  | 32.870   |
| rs4909945   | C | T | (0.031) | 0.002 | 1.30E-44  | 196.334  |
| rs4921105   | G | A | 0.020   | 0.003 | 3.40E-11  | 43.913   |
| rs4926718   | G | A | 0.014   | 0.002 | 6.10E-09  | 33.804   |
| rs4941565   | G | T | (0.030) | 0.002 | 3.40E-44  | 194.467  |
| rs4950886   | A | G | (0.014) | 0.002 | 1.30E-11  | 45.855   |
| rs4952073   | C | T | (0.075) | 0.002 | 1.00E-200 | 1090.768 |
| rs4970966   | T | G | 0.016   | 0.002 | 1.40E-10  | 41.136   |
| rs4972699   | C | G | 0.038   | 0.005 | 6.10E-14  | 56.338   |
| rs4980840   | A | G | 0.015   | 0.003 | 9.40E-09  | 32.957   |
| rs504082    | T | G | (0.014) | 0.002 | 1.50E-09  | 36.477   |
| rs511141    | A | G | (0.013) | 0.002 | 2.80E-09  | 35.337   |
| rs530059793 | G | A | 0.125   | 0.011 | 2.30E-28  | 122.004  |
| rs531503    | C | T | 0.014   | 0.002 | 9.90E-11  | 41.833   |
| rs55709369  | A | G | 0.031   | 0.005 | 1.00E-10  | 41.812   |
| rs55844975  | C | T | (0.018) | 0.003 | 6.30E-10  | 38.232   |

|             |   |   |         |       |           |          |
|-------------|---|---|---------|-------|-----------|----------|
| rs55874505  | G | T | 0.024   | 0.002 | 8.10E-30  | 128.642  |
| rs55903042  | A | G | 0.015   | 0.002 | 1.10E-10  | 41.563   |
| rs55905547  | G | A | (0.072) | 0.003 | 1.00E-163 | 743.572  |
| rs56043070  | A | G | 0.120   | 0.004 | 4.70E-200 | 910.657  |
| rs56079926  | T | C | 0.017   | 0.002 | 1.20E-14  | 59.563   |
| rs56094005  | G | A | 0.062   | 0.005 | 1.10E-34  | 150.844  |
| rs56094988  | C | G | (0.022) | 0.004 | 1.60E-09  | 36.432   |
| rs56106611  | G | T | (0.240) | 0.008 | 4.00E-193 | 878.799  |
| rs56116444  | G | T | (0.032) | 0.004 | 2.00E-16  | 67.576   |
| rs56125990  | G | A | 0.022   | 0.003 | 3.90E-14  | 57.235   |
| rs56133113  | G | A | (0.039) | 0.003 | 3.70E-34  | 148.514  |
| rs56287412  | C | T | 0.017   | 0.002 | 8.00E-17  | 69.400   |
| rs56326157  | C | T | (0.025) | 0.003 | 3.70E-23  | 98.254   |
| rs56681946  | C | T | (0.017) | 0.002 | 5.00E-15  | 61.256   |
| rs5749169   | C | T | (0.019) | 0.003 | 2.00E-09  | 35.931   |
| rs5757946   | G | A | 0.014   | 0.002 | 2.20E-10  | 40.254   |
| rs57581963  | A | G | 0.016   | 0.002 | 3.30E-13  | 53.044   |
| rs5758910   | C | G | (0.032) | 0.002 | 1.80E-46  | 204.868  |
| rs577681458 | A | C | 0.066   | 0.004 | 8.90E-64  | 284.258  |
| rs57935882  | C | G | (0.042) | 0.004 | 4.10E-33  | 143.724  |
| rs583306    | T | C | (0.047) | 0.002 | 1.60E-90  | 407.099  |
| rs58761612  | A | G | (0.026) | 0.004 | 1.20E-11  | 46.023   |
| rs590820    | G | A | 0.013   | 0.002 | 4.90E-10  | 38.706   |
| rs594164    | C | A | (0.017) | 0.002 | 7.60E-16  | 64.971   |
| rs59508494  | G | A | 0.260   | 0.008 | 1.00E-200 | 1018.575 |
| rs6031849   | T | G | 0.029   | 0.002 | 3.40E-37  | 162.383  |
| rs603424    | A | G | (0.060) | 0.003 | 2.20E-107 | 484.509  |
| rs60371757  | A | T | (0.031) | 0.003 | 4.20E-30  | 129.943  |
| rs60408013  | C | T | 0.015   | 0.002 | 1.60E-12  | 49.877   |
| rs6045559   | T | C | (0.071) | 0.002 | 1.00E-200 | 1048.477 |
| rs6058375   | A | T | (0.020) | 0.003 | 9.00E-13  | 51.059   |
| rs6065      | T | C | (0.050) | 0.004 | 1.20E-37  | 164.537  |
| rs60695258  | T | C | (0.020) | 0.002 | 5.30E-22  | 92.982   |
| rs60757417  | G | C | 0.113   | 0.004 | 3.20E-148 | 672.295  |
| rs6081569   | C | G | 0.025   | 0.002 | 9.70E-32  | 137.438  |
| rs61009920  | A | C | (0.052) | 0.003 | 3.30E-67  | 299.970  |
| rs61269268  | C | A | (0.040) | 0.003 | 9.00E-49  | 215.416  |
| rs616008    | T | C | (0.013) | 0.002 | 1.30E-09  | 36.869   |
| rs61607560  | T | C | (0.034) | 0.003 | 1.40E-32  | 141.339  |
| rs61751937  | C | G | 0.055   | 0.006 | 1.70E-19  | 81.510   |
| rs61830291  | C | A | (0.029) | 0.003 | 1.50E-17  | 72.680   |
| rs61853632  | A | G | (0.080) | 0.006 | 3.30E-45  | 199.072  |
| rs61905108  | A | C | 0.028   | 0.005 | 6.70E-09  | 33.618   |
| rs62073988  | T | C | (0.033) | 0.003 | 2.70E-38  | 167.396  |
| rs62120075  | G | T | (0.028) | 0.004 | 6.40E-15  | 60.768   |
| rs62175230  | T | C | (0.018) | 0.002 | 7.40E-19  | 78.649   |
| rs62332261  | T | C | (0.014) | 0.003 | 2.60E-08  | 31.008   |
| rs62340877  | A | G | (0.022) | 0.003 | 6.20E-18  | 74.463   |
| rs62380762  | C | G | (0.021) | 0.002 | 5.80E-18  | 74.604   |
| rs62395851  | C | G | 0.072   | 0.004 | 9.70E-79  | 352.945  |

|            |   |   |         |       |           |         |
|------------|---|---|---------|-------|-----------|---------|
| rs62506682 | A | C | (0.019) | 0.003 | 1.20E-08  | 32.460  |
| rs62550975 | G | A | (0.033) | 0.004 | 8.40E-15  | 60.246  |
| rs6452819  | A | G | 0.047   | 0.007 | 8.40E-13  | 51.186  |
| rs6473306  | C | T | (0.013) | 0.002 | 2.00E-10  | 40.443  |
| rs6499129  | C | A | 0.034   | 0.003 | 1.90E-22  | 95.052  |
| rs6502738  | G | A | (0.024) | 0.002 | 8.60E-31  | 133.091 |
| rs6556405  | C | T | 0.067   | 0.002 | 1.90E-175 | 797.494 |
| rs6680258  | T | G | (0.021) | 0.002 | 1.80E-19  | 81.404  |
| rs6698842  | T | C | 0.013   | 0.002 | 5.40E-10  | 38.545  |
| rs6759839  | G | A | (0.035) | 0.002 | 3.10E-58  | 258.817 |
| rs6763024  | C | T | (0.017) | 0.002 | 2.40E-13  | 53.638  |
| rs6778454  | C | A | (0.021) | 0.002 | 6.10E-23  | 97.248  |
| rs67784641 | C | A | (0.021) | 0.003 | 4.00E-11  | 43.621  |
| rs67916705 | G | A | (0.014) | 0.002 | 8.40E-09  | 33.185  |
| rs6796     | C | T | (0.034) | 0.002 | 1.40E-49  | 219.172 |
| rs680210   | C | T | 0.025   | 0.002 | 1.50E-31  | 136.601 |
| rs6805034  | G | C | (0.026) | 0.002 | 6.00E-27  | 115.538 |
| rs68066031 | C | T | (0.030) | 0.002 | 4.90E-35  | 152.513 |
| rs6808932  | C | A | 0.022   | 0.002 | 4.30E-26  | 111.615 |
| rs6836941  | C | T | (0.083) | 0.003 | 1.00E-200 | 928.884 |
| rs6850636  | A | G | 0.019   | 0.003 | 3.80E-13  | 52.741  |
| rs6869332  | G | A | (0.048) | 0.003 | 9.80E-73  | 325.379 |
| rs688167   | G | C | 0.018   | 0.002 | 8.00E-16  | 64.862  |
| rs6899047  | C | G | 0.036   | 0.005 | 2.90E-11  | 44.225  |
| rs690686   | T | C | (0.032) | 0.004 | 8.30E-19  | 78.424  |
| rs6915030  | C | T | (0.024) | 0.003 | 6.40E-13  | 51.734  |
| rs6985353  | A | G | 0.027   | 0.002 | 7.80E-39  | 169.894 |
| rs6993770  | T | A | 0.045   | 0.002 | 1.30E-87  | 393.706 |
| rs7022807  | G | A | (0.019) | 0.002 | 9.00E-20  | 82.821  |
| rs7042161  | C | T | (0.014) | 0.002 | 3.70E-11  | 43.750  |
| rs7150606  | T | G | 0.030   | 0.003 | 9.30E-24  | 100.977 |
| rs7258141  | T | A | 0.024   | 0.002 | 1.40E-26  | 113.827 |
| rs72668171 | A | G | (0.024) | 0.003 | 1.20E-18  | 77.716  |
| rs72687006 | C | T | (0.092) | 0.008 | 5.20E-29  | 124.966 |
| rs72691294 | A | G | 0.055   | 0.004 | 6.30E-38  | 165.735 |
| rs72716340 | C | G | 0.017   | 0.003 | 3.50E-09  | 34.858  |
| rs72749964 | A | G | (0.016) | 0.003 | 2.20E-09  | 35.786  |
| rs72761071 | G | C | 0.129   | 0.007 | 3.20E-75  | 336.776 |
| rs72793380 | A | C | (0.025) | 0.003 | 3.80E-13  | 52.747  |
| rs72803369 | G | C | 0.037   | 0.005 | 1.40E-12  | 50.172  |
| rs72847536 | A | G | 0.068   | 0.006 | 3.30E-30  | 130.456 |
| rs73000929 | A | G | 0.095   | 0.005 | 5.80E-68  | 303.464 |
| rs7311196  | G | A | 0.061   | 0.003 | 2.10E-76  | 342.205 |
| rs73112592 | C | G | 0.076   | 0.007 | 7.90E-30  | 128.688 |
| rs73165962 | A | G | 0.030   | 0.003 | 4.80E-24  | 102.279 |
| rs73184272 | G | T | 0.084   | 0.008 | 3.90E-27  | 116.380 |
| rs73186292 | G | A | (0.049) | 0.008 | 4.00E-10  | 39.118  |
| rs73289314 | T | C | 0.059   | 0.008 | 6.90E-14  | 56.092  |
| rs7349311  | A | G | 0.038   | 0.003 | 1.00E-45  | 201.406 |
| rs73723358 | G | A | (0.068) | 0.003 | 5.00E-100 | 450.730 |

|            |   |   |         |       |           |          |
|------------|---|---|---------|-------|-----------|----------|
| rs74124004 | A | G | 0.041   | 0.003 | 6.30E-35  | 152.002  |
| rs741887   | A | G | (0.013) | 0.002 | 6.40E-10  | 38.180   |
| rs744233   | A | G | 0.015   | 0.002 | 3.80E-11  | 43.694   |
| rs74914371 | C | T | 0.035   | 0.006 | 1.40E-08  | 32.143   |
| rs74950833 | C | G | (0.065) | 0.008 | 1.30E-15  | 63.905   |
| rs75068943 | G | A | (0.083) | 0.004 | 2.80E-111 | 502.444  |
| rs754179   | T | C | 0.014   | 0.002 | 3.10E-10  | 39.600   |
| rs75457925 | G | A | 0.034   | 0.006 | 1.20E-09  | 36.915   |
| rs7563723  | C | T | 0.021   | 0.002 | 3.30E-22  | 93.901   |
| rs75699653 | T | C | 0.071   | 0.007 | 2.50E-26  | 112.690  |
| rs7585866  | G | A | (0.038) | 0.002 | 8.90E-70  | 311.788  |
| rs7586747  | A | G | 0.013   | 0.002 | 1.30E-09  | 36.852   |
| rs7608716  | T | A | 0.020   | 0.003 | 1.40E-09  | 36.725   |
| rs76091143 | A | C | (0.034) | 0.006 | 1.70E-08  | 31.816   |
| rs76109311 | G | A | 0.015   | 0.002 | 4.50E-13  | 52.397   |
| rs7618405  | A | C | 0.034   | 0.003 | 5.40E-41  | 179.789  |
| rs7632444  | C | T | 0.018   | 0.003 | 3.80E-11  | 43.736   |
| rs7638633  | C | T | (0.039) | 0.002 | 7.70E-65  | 289.137  |
| rs7639048  | G | A | (0.021) | 0.002 | 1.30E-25  | 109.370  |
| rs76452111 | T | A | 0.090   | 0.005 | 1.40E-70  | 315.501  |
| rs76900683 | C | G | (0.051) | 0.005 | 9.60E-27  | 114.600  |
| rs7710854  | G | A | 0.024   | 0.003 | 1.60E-13  | 54.408   |
| rs7712401  | T | C | 0.023   | 0.002 | 8.40E-29  | 123.999  |
| rs7720336  | G | A | (0.025) | 0.004 | 1.00E-11  | 46.327   |
| rs7726369  | C | G | 0.030   | 0.004 | 1.70E-16  | 67.947   |
| rs77373975 | C | T | 0.182   | 0.005 | 1.00E-200 | 1422.639 |
| rs77585733 | G | A | 0.022   | 0.004 | 2.30E-08  | 31.230   |
| rs7775219  | T | C | (0.018) | 0.003 | 6.70E-10  | 38.107   |
| rs77808283 | A | G | (0.058) | 0.005 | 4.80E-27  | 115.978  |
| rs7786376  | G | A | 0.016   | 0.002 | 2.30E-12  | 49.217   |
| rs7792825  | C | T | (0.013) | 0.002 | 8.20E-09  | 33.217   |
| rs7808005  | T | C | 0.030   | 0.002 | 5.40E-40  | 175.211  |
| rs78107380 | A | C | 0.041   | 0.006 | 7.60E-12  | 46.874   |
| rs7830416  | A | T | (0.023) | 0.003 | 1.70E-14  | 58.813   |
| rs78436760 | C | T | 0.096   | 0.002 | 1.00E-200 | 2277.601 |
| rs7914782  | G | A | 0.016   | 0.002 | 5.50E-15  | 61.076   |
| rs79411242 | T | C | 0.021   | 0.004 | 2.70E-08  | 30.928   |
| rs7949566  | A | G | 0.036   | 0.002 | 2.60E-69  | 309.645  |
| rs79716587 | A | G | 0.038   | 0.003 | 1.90E-34  | 149.854  |
| rs79744378 | T | G | (0.152) | 0.007 | 3.20E-104 | 470.029  |
| rs79749090 | G | A | (0.036) | 0.004 | 5.70E-20  | 83.720   |
| rs7975687  | C | T | (0.024) | 0.002 | 4.60E-32  | 138.912  |
| rs79762299 | T | A | 0.101   | 0.003 | 1.00E-200 | 1336.970 |
| rs79847479 | A | C | 0.069   | 0.004 | 3.80E-66  | 295.126  |
| rs80016599 | T | G | 0.079   | 0.011 | 2.60E-13  | 53.500   |
| rs80026440 | G | C | (0.033) | 0.006 | 3.60E-08  | 30.381   |
| rs8038177  | T | A | (0.013) | 0.002 | 9.10E-10  | 37.506   |
| rs8106212  | T | C | 0.136   | 0.010 | 2.00E-45  | 200.047  |
| rs8115191  | T | C | (0.024) | 0.002 | 2.90E-31  | 135.262  |
| rs817324   | A | G | (0.015) | 0.002 | 2.10E-09  | 35.878   |

|           |   |   |         |       |           |          |
|-----------|---|---|---------|-------|-----------|----------|
| rs826426  | A | G | 0.018   | 0.003 | 1.30E-08  | 32.269   |
| rs869487  | G | C | 0.015   | 0.002 | 5.60E-09  | 33.965   |
| rs881399  | C | T | 0.036   | 0.003 | 1.40E-37  | 164.121  |
| rs920748  | C | T | (0.050) | 0.005 | 9.50E-22  | 91.822   |
| rs9311171 | G | T | 0.016   | 0.003 | 7.40E-09  | 33.431   |
| rs9320278 | C | T | (0.015) | 0.002 | 1.40E-12  | 50.155   |
| rs9386889 | T | C | 0.013   | 0.002 | 1.30E-09  | 36.802   |
| rs939136  | C | G | (0.026) | 0.002 | 3.10E-34  | 148.834  |
| rs9425824 | A | G | 0.091   | 0.003 | 1.00E-200 | 987.777  |
| rs9426262 | G | T | (0.016) | 0.002 | 4.10E-12  | 48.082   |
| rs944002  | G | A | (0.076) | 0.002 | 1.00E-200 | 1023.838 |
| rs9543534 | T | C | 0.019   | 0.002 | 1.00E-16  | 68.945   |
| rs9549753 | A | C | 0.046   | 0.002 | 6.40E-111 | 500.785  |
| rs9573565 | T | C | 0.019   | 0.002 | 2.20E-15  | 62.856   |
| rs9577481 | A | G | 0.025   | 0.003 | 2.10E-20  | 85.702   |
| rs9583151 | C | T | 0.015   | 0.002 | 6.60E-13  | 51.656   |
| rs9595404 | T | C | 0.012   | 0.002 | 3.70E-08  | 30.321   |
| rs9616908 | G | A | (0.029) | 0.002 | 3.30E-43  | 189.950  |
| rs968042  | A | G | (0.024) | 0.002 | 1.60E-28  | 122.749  |
| rs972577  | T | C | 0.059   | 0.002 | 2.80E-179 | 815.138  |
| rs9729409 | G | A | 0.021   | 0.002 | 6.30E-20  | 83.527   |
| rs9736609 | A | G | (0.103) | 0.003 | 1.00E-200 | 1366.054 |
| rs9833022 | T | C | (0.050) | 0.008 | 4.50E-10  | 38.887   |
| rs9846396 | T | C | (0.016) | 0.002 | 7.30E-15  | 60.524   |
| rs9874738 | T | G | 0.016   | 0.002 | 1.20E-11  | 46.018   |
| rs9894399 | C | A | 0.025   | 0.004 | 8.10E-11  | 42.227   |
| rs9894993 | C | T | 0.016   | 0.002 | 3.90E-14  | 57.198   |
| rs9902260 | T | C | (0.027) | 0.002 | 5.50E-40  | 175.184  |
| rs9926137 | C | G | 0.026   | 0.003 | 1.60E-22  | 95.289   |
| rs993284  | G | C | 0.018   | 0.003 | 2.30E-12  | 49.195   |
| rs9937661 | C | T | 0.033   | 0.002 | 2.60E-55  | 245.415  |
| rs9974653 | C | A | 0.017   | 0.002 | 9.60E-15  | 59.973   |

---

**Table S2. Details of COPD SNPs (with genome-wide significant SNPs)**

| Exposure   | SNP         | Effect allele | Other allele | P value | Beta     | Standard Error | F       | Median F | Mean F |
|------------|-------------|---------------|--------------|---------|----------|----------------|---------|----------|--------|
| COPD       | rs11083581  | T             | G            | 0.070   | 0.012    | 1.43E-08       | 32.140  | 36.725   | 54.856 |
|            | rs11749630  | G             | T            | -0.059  | 0.010    | 5.76E-09       | 33.914  |          |        |
|            | rs11811826  | A             | T            | -0.071  | 0.012    | 1.26E-09       | 36.870  |          |        |
|            | rs12914385  | T             | C            | 0.192   | 0.010    | 2.38E-82       | 369.521 |          |        |
|            | rs13270042  | G             | A            | 0.095   | 0.015    | 5.97E-10       | 38.330  |          |        |
|            | rs13361953  | C             | T            | 0.056   | 0.010    | 1.96E-08       | 31.532  |          |        |
|            | rs1379933   | C             | T            | -0.064  | 0.010    | 7.23E-10       | 37.959  |          |        |
|            | rs141715902 | T             | C            | 0.182   | 0.031    | 3.78E-09       | 34.732  |          |        |
|            | rs146790727 | T             | C            | -0.109  | 0.019    | 1.89E-08       | 31.601  |          |        |
|            | rs16971904  | T             | A            | -0.178  | 0.030    | 1.60E-09       | 36.409  |          |        |
|            | rs2855655   | C             | T            | 0.060   | 0.010    | 4.73E-09       | 34.299  |          |        |
|            | rs28929474  | T             | C            | 0.329   | 0.032    | 1.98E-24       | 104.041 |          |        |
|            | rs3936197   | A             | G            | -0.055  | 0.010    | 2.45E-08       | 31.101  |          |        |
|            | rs56223946  | T             | C            | -0.112  | 0.017    | 2.15E-11       | 44.834  |          |        |
|            | rs6011779   | T             | C            | -0.094  | 0.011    | 4.71E-17       | 70.455  |          |        |
|            | rs624833    | G             | T            | -0.057  | 0.010    | 3.15E-08       | 30.612  |          |        |
|            | rs6817273   | C             | T            | -0.060  | 0.010    | 9.20E-10       | 37.488  |          |        |
|            | rs6869423   | T             | C            | 0.060   | 0.010    | 8.17E-10       | 37.720  |          |        |
|            | rs708461    | C             | G            | 0.075   | 0.012    | 3.45E-10       | 39.404  |          |        |
|            | rs76453876  | T             | A            | -0.168  | 0.029    | 5.43E-09       | 34.030  |          |        |
|            | rs7676321   | A             | G            | 0.066   | 0.011    | 1.36E-09       | 36.725  |          |        |
|            | rs7783505   | G             | C            | -0.058  | 0.010    | 1.24E-08       | 32.429  |          |        |
|            | rs9270713   | A             | G            | 0.066   | 0.010    | 1.50E-11       | 45.531  |          |        |
|            | rs11083581  | T             | G            | 0.070   | 0.012    | 1.43E-08       | 32.140  |          |        |
|            | rs11749630  | G             | T            | -0.059  | 0.010    | 5.76E-09       | 33.914  |          |        |
|            | rs11811826  | A             | T            | -0.071  | 0.012    | 1.26E-09       | 36.870  |          |        |
|            | rs12914385  | T             | C            | 0.192   | 0.010    | 2.38E-82       | 369.521 |          |        |
|            | rs13270042  | G             | A            | 0.095   | 0.015    | 5.97E-10       | 38.330  |          |        |
|            | rs13361953  | C             | T            | 0.056   | 0.010    | 1.96E-08       | 31.532  |          |        |
|            | rs1379933   | C             | T            | -0.064  | 0.010    | 7.23E-10       | 37.959  |          |        |
|            | rs141715902 | T             | C            | 0.182   | 0.031    | 3.78E-09       | 34.732  |          |        |
|            | rs146790727 | T             | C            | -0.109  | 0.019    | 1.89E-08       | 31.601  |          |        |
|            | rs16971904  | T             | A            | -0.178  | 0.030    | 1.60E-09       | 36.409  |          |        |
|            | rs2855655   | C             | T            | 0.060   | 0.010    | 4.73E-09       | 34.299  |          |        |
|            | rs28929474  | T             | C            | 0.329   | 0.032    | 1.98E-24       | 104.041 |          |        |
|            | rs3936197   | A             | G            | -0.055  | 0.010    | 2.45E-08       | 31.101  |          |        |
|            | rs56223946  | T             | C            | -0.112  | 0.017    | 2.15E-11       | 44.834  |          |        |
|            | rs6011779   | T             | C            | -0.094  | 0.011    | 4.71E-17       | 70.455  |          |        |
|            | rs624833    | G             | T            | -0.057  | 0.010    | 3.15E-08       | 30.612  |          |        |
|            | rs6817273   | C             | T            | -0.060  | 0.010    | 9.20E-10       | 37.488  |          |        |
|            | rs6869423   | T             | C            | 0.060   | 0.010    | 8.17E-10       | 37.720  |          |        |
|            | rs708461    | C             | G            | 0.075   | 0.012    | 3.45E-10       | 39.404  |          |        |
| rs76453876 | T           | A             | -0.168       | 0.029   | 5.43E-09 | 34.030         |         |          |        |
| rs7676321  | A           | G             | 0.066        | 0.011   | 1.36E-09 | 36.725         |         |          |        |
| rs7783505  | G           | C             | -0.058       | 0.010   | 1.24E-08 | 32.429         |         |          |        |
| rs9270713  | A           | G             | 0.066        | 0.010   | 1.50E-11 | 45.531         |         |          |        |
| rs11083581 | T           | G             | 0.070        | 0.012   | 1.43E-08 | 32.140         |         |          |        |
| rs11749630 | G           | T             | -0.059       | 0.010   | 5.76E-09 | 33.914         |         |          |        |
| rs11811826 | A           | T             | -0.071       | 0.012   | 1.26E-09 | 36.870         |         |          |        |

|             |   |   |        |       |          |         |
|-------------|---|---|--------|-------|----------|---------|
| rs12914385  | T | C | 0.192  | 0.010 | 2.38E-82 | 369.521 |
| rs13270042  | G | A | 0.095  | 0.015 | 5.97E-10 | 38.330  |
| rs13361953  | C | T | 0.056  | 0.010 | 1.96E-08 | 31.532  |
| rs1379933   | C | T | -0.064 | 0.010 | 7.23E-10 | 37.959  |
| rs141715902 | T | C | 0.182  | 0.031 | 3.78E-09 | 34.732  |
| rs146790727 | T | C | -0.109 | 0.019 | 1.89E-08 | 31.601  |
| rs16971904  | T | A | -0.178 | 0.030 | 1.60E-09 | 36.409  |
| rs2855655   | C | T | 0.060  | 0.010 | 4.73E-09 | 34.299  |
| rs28929474  | T | C | 0.329  | 0.032 | 1.98E-24 | 104.041 |
| rs3936197   | A | G | -0.055 | 0.010 | 2.45E-08 | 31.101  |
| rs56223946  | T | C | -0.112 | 0.017 | 2.15E-11 | 44.834  |
| rs6011779   | T | C | -0.094 | 0.011 | 4.71E-17 | 70.455  |
| rs624833    | G | T | -0.057 | 0.010 | 3.15E-08 | 30.612  |
| rs6817273   | C | T | -0.060 | 0.010 | 9.20E-10 | 37.488  |
| rs6869423   | T | C | 0.060  | 0.010 | 8.17E-10 | 37.720  |
| rs708461    | C | G | 0.075  | 0.012 | 3.45E-10 | 39.404  |
| rs76453876  | T | A | -0.168 | 0.029 | 5.43E-09 | 34.030  |
| rs7676321   | A | G | 0.066  | 0.011 | 1.36E-09 | 36.725  |
| rs7783505   | G | C | -0.058 | 0.010 | 1.24E-08 | 32.429  |
| rs9270713   | A | G | 0.066  | 0.010 | 1.50E-11 | 45.531  |
| rs11083581  | T | G | 0.070  | 0.012 | 1.43E-08 | 32.140  |
| rs11749630  | G | T | -0.059 | 0.010 | 5.76E-09 | 33.914  |
| rs11811826  | A | T | -0.071 | 0.012 | 1.26E-09 | 36.870  |
| rs12914385  | T | C | 0.192  | 0.010 | 2.38E-82 | 369.521 |
| rs13270042  | G | A | 0.095  | 0.015 | 5.97E-10 | 38.330  |
| rs13361953  | C | T | 0.056  | 0.010 | 1.96E-08 | 31.532  |
| rs1379933   | C | T | -0.064 | 0.010 | 7.23E-10 | 37.959  |
| rs141715902 | T | C | 0.182  | 0.031 | 3.78E-09 | 34.732  |
| rs146790727 | T | C | -0.109 | 0.019 | 1.89E-08 | 31.601  |
| rs16971904  | T | A | -0.178 | 0.030 | 1.60E-09 | 36.409  |
| rs2855655   | C | T | 0.060  | 0.010 | 4.73E-09 | 34.299  |
| rs28929474  | T | C | 0.329  | 0.032 | 1.98E-24 | 104.041 |
| rs3936197   | A | G | -0.055 | 0.010 | 2.45E-08 | 31.101  |
| rs56223946  | T | C | -0.112 | 0.017 | 2.15E-11 | 44.834  |
| rs6011779   | T | C | -0.094 | 0.011 | 4.71E-17 | 70.455  |
| rs624833    | G | T | -0.057 | 0.010 | 3.15E-08 | 30.612  |
| rs6817273   | C | T | -0.060 | 0.010 | 9.20E-10 | 37.488  |
| rs6869423   | T | C | 0.060  | 0.010 | 8.17E-10 | 37.720  |
| rs708461    | C | G | 0.075  | 0.012 | 3.45E-10 | 39.404  |
| rs76453876  | T | A | -0.168 | 0.029 | 5.43E-09 | 34.030  |
| rs7676321   | A | G | 0.066  | 0.011 | 1.36E-09 | 36.725  |
| rs7783505   | G | C | -0.058 | 0.010 | 1.24E-08 | 32.429  |
| rs9270713   | A | G | 0.066  | 0.010 | 1.50E-11 | 45.531  |

---



**Table S3. Association of platelet indices With COPD Using Mendelian Randomization heterogeneity analysis results (With SNPs reaching  $p < 5 \times 10^{-8}$ )**

| <b>exposure</b>             | <b>outcome</b>            | <b>method</b>             | <b>Statistic Q</b> | <b>Q_pval</b> |
|-----------------------------|---------------------------|---------------------------|--------------------|---------------|
| Mean platelet volume        | COPD                      | MR Egger                  | 827.9920912        | 1.36E-24      |
|                             |                           | Inverse variance weighted | 827.9990826        | 1.84E-24      |
| Plateletcrit                |                           | MR Egger                  | 748.0672105        | 1.23E-16      |
|                             |                           | Inverse variance weighted | 748.424183         | 1.48E-16      |
| Platelet distribution width |                           | MR Egger                  | 646.2228622        | 4.43E-15      |
|                             |                           | Inverse variance weighted | 646.2803074        | 5.67E-15      |
| Platelet count              | MR Egger                  | 844.5186508               | 9.92E-22           |               |
|                             | Inverse variance weighted | 846.920958                | 7.83E-22           |               |

**Table S4. Association of COPD With platelet indices Using Mendelian Randomization heterogeneityanalysisresults (With SNPs reaching  $p < 5 \times 10^{-8}$ )**

| <b>exposure</b> | <b>outcome</b>              | <b>method</b>             | <b>Statistic Q</b> | <b>Q_pval</b> |
|-----------------|-----------------------------|---------------------------|--------------------|---------------|
| COPD            | Mean platelet volume        | MR Egger                  | 144.5884594        | 1.86E-20      |
|                 |                             | Inverse variance weighted | 146.8464249        | 1.88E-20      |
|                 | Plateletcrit                | MR Egger                  | 63.08985517        | 4.30E-06      |
|                 |                             | Inverse variance weighted | 66.12321105        | 2.66E-06      |
|                 | Platelet distribution width | MR Egger                  | 60.76532787        | 9.77E-06      |
|                 |                             | Inverse variance weighted | 62.59929825        | 9.14E-06      |
|                 | Platelet count              | MR Egger                  | 105.7699896        | 2.71E-13      |
|                 |                             | Inverse variance weighted | 106.6388141        | 4.37E-13      |



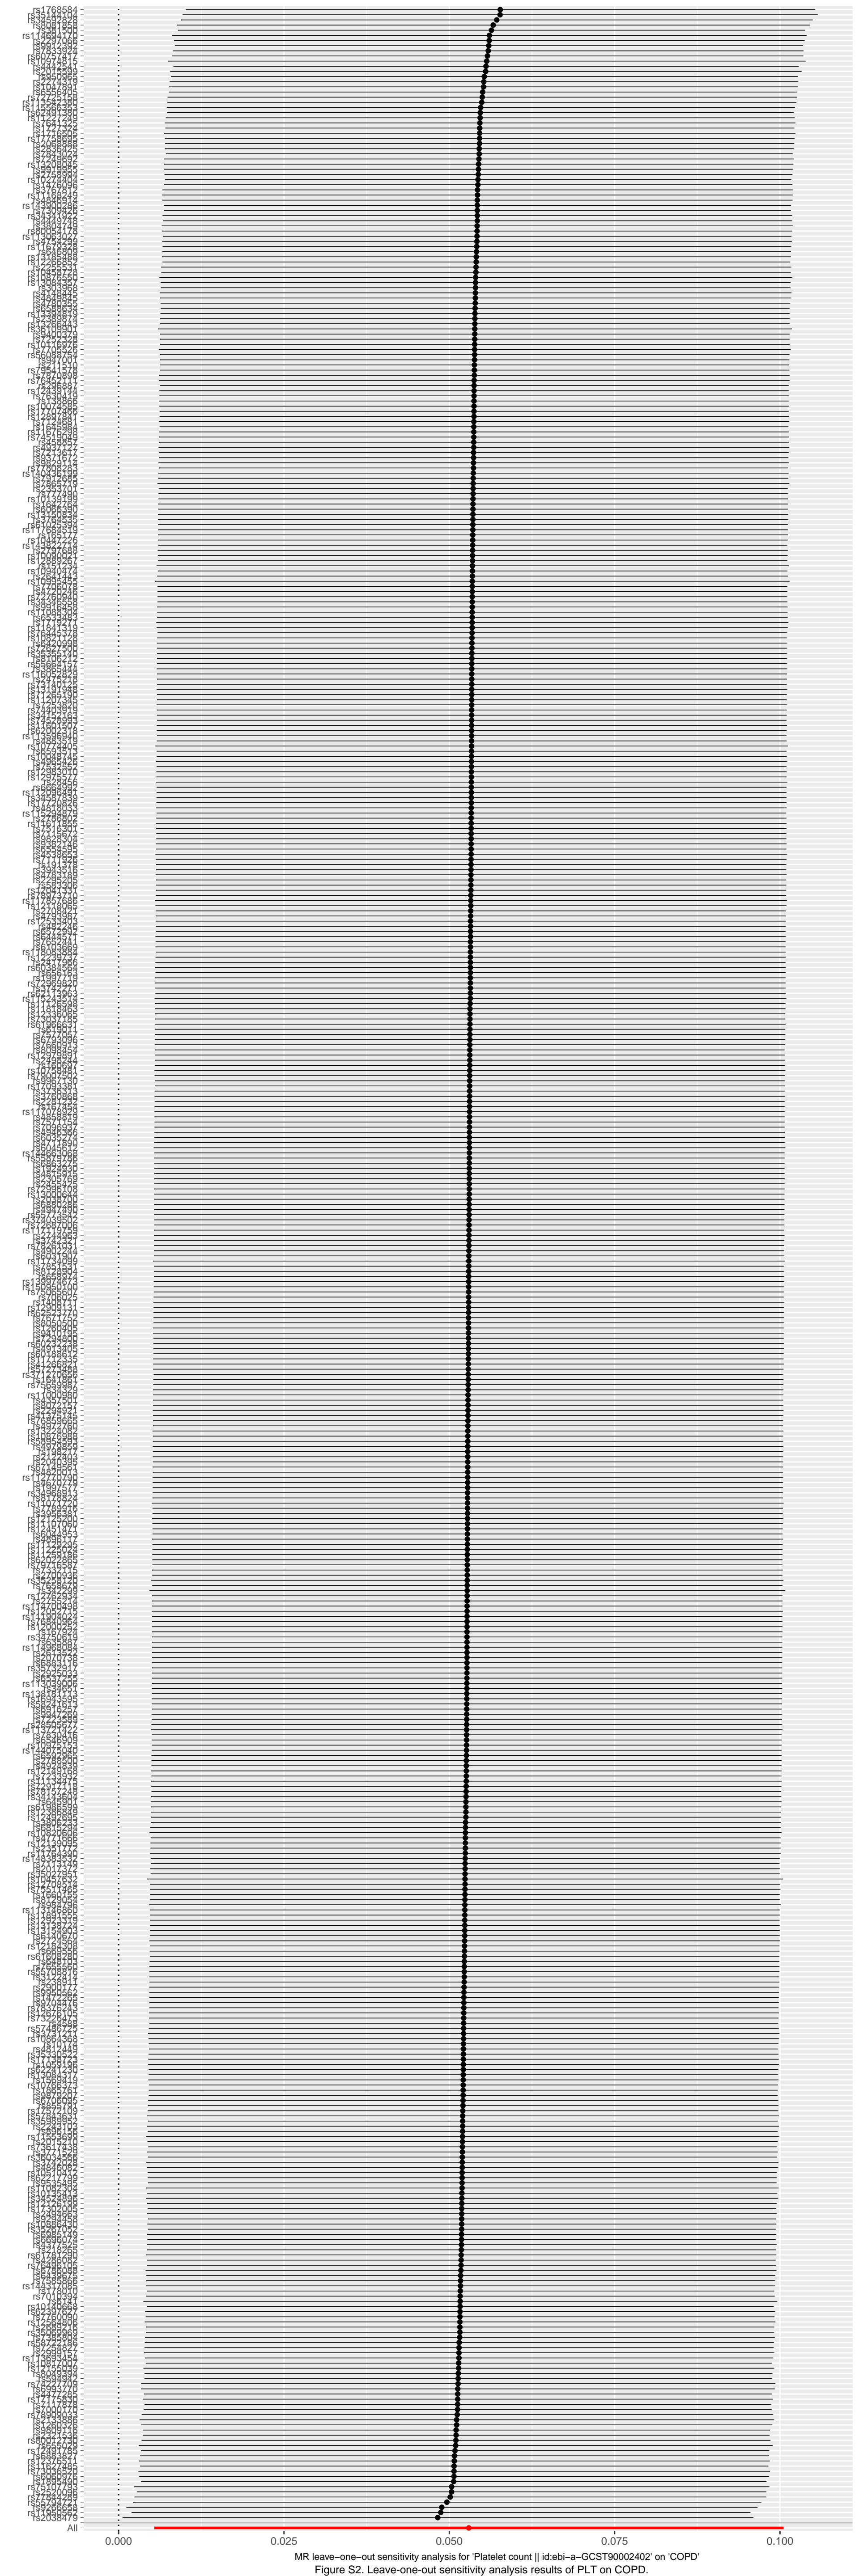

MR leave-one-out sensitivity analysis for 'Platelet count || id:ebi-a-GCST90002402' on 'COPD'

Figure S2. Leave-one-out sensitivity analysis results of PLT on COPD.
